# Supplementary material
Source: PubMed Central journal article supplement (PMC11221913)
Supplement: NIHMS1995308-supplement-Expression_Data.pdf [file NIHMS1995308-supplement-Expression_Data.pdf]

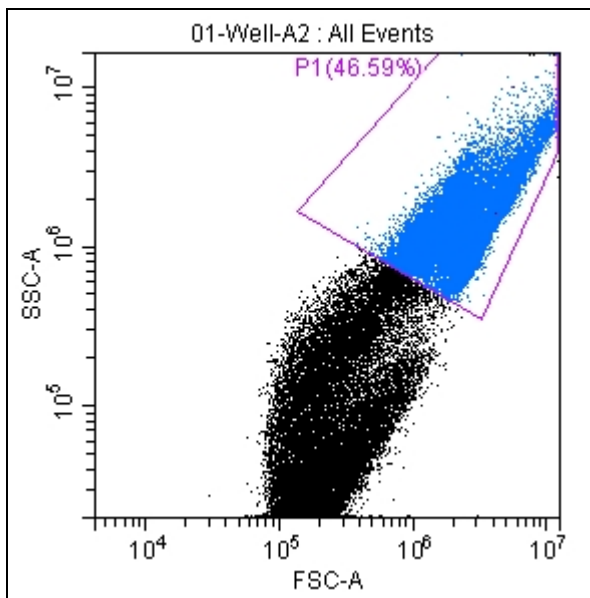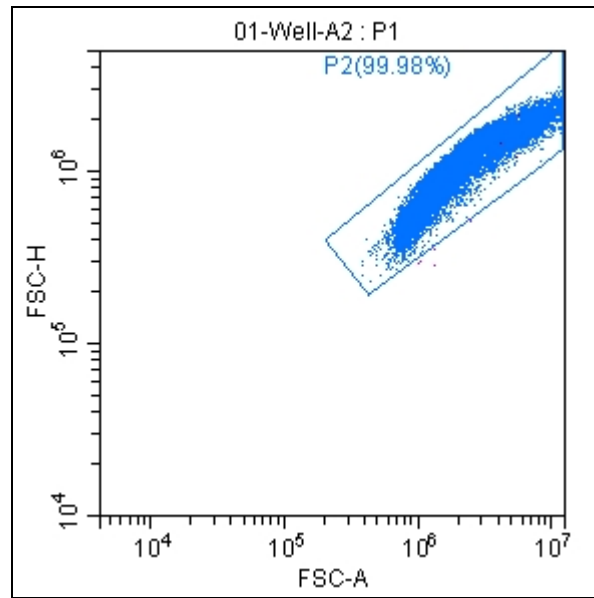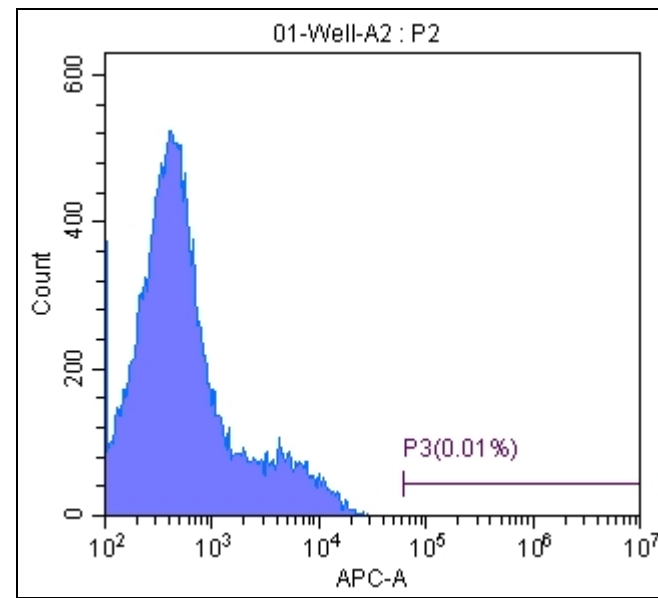

Tube Name: 01-Well-A2

Sample ID:

Record Time: 2023-03-06 12:06:37

| Population   | Events | % Total | % Parent | Mean APC-A | Median APC-A | rSD APC-A |
|--------------|--------|---------|----------|------------|--------------|-----------|
| ● All Events | 50000  | 100.00% | 100.00%  | 684.6      | 190.8        | 306.3     |
| ● P3         | 3      | 0.01%   | 0.01%    | 233928.3   | 193414.9     | 194773.6  |
| ● P2         | 23290  | 46.58%  | 99.98%   | 1290.0     | 418.2        | 351.2     |
| ● P1         | 23295  | 46.59%  | 46.59%   | 1289.8     | 418.2        | 351.2     |

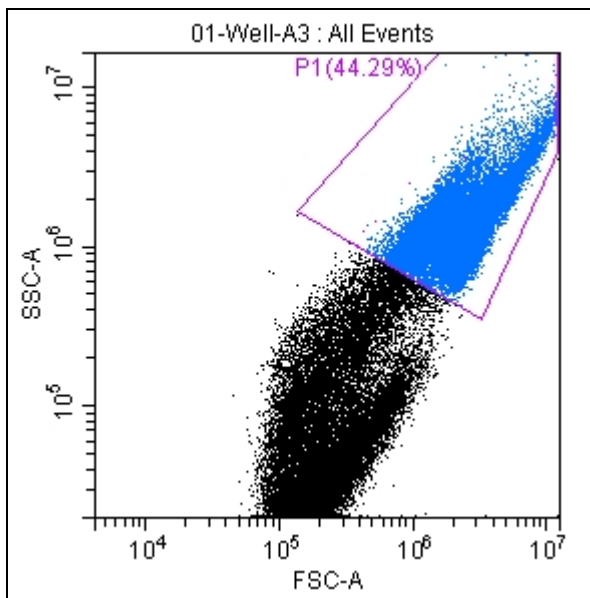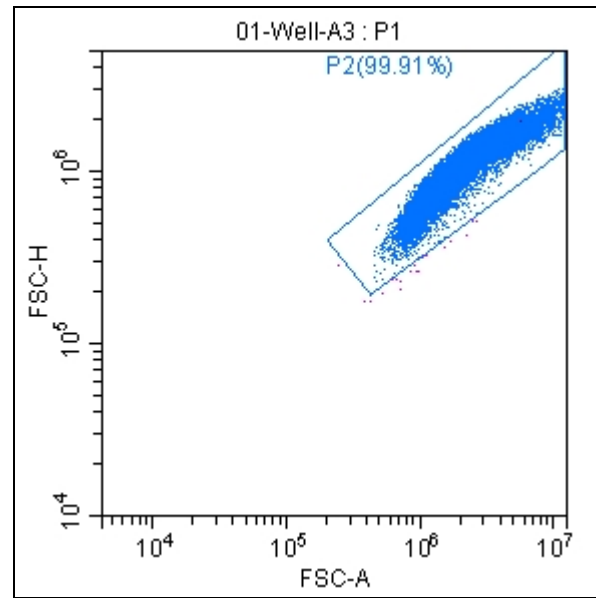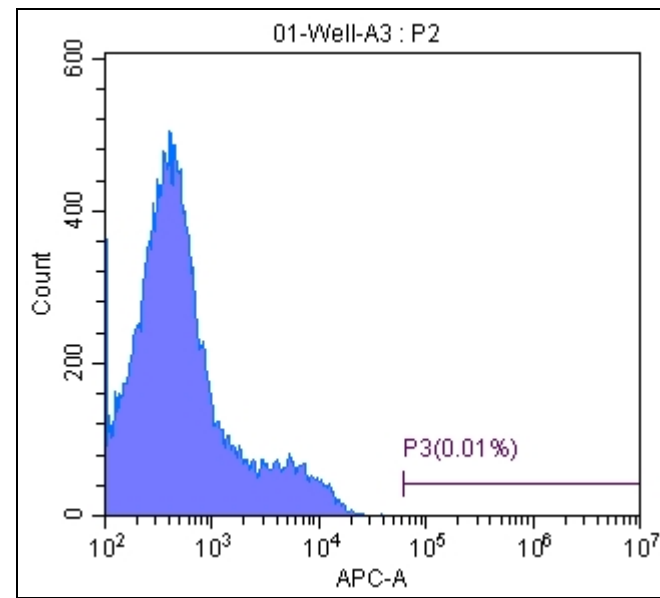

Tube Name: 01-Well-A3

Sample ID:

Record Time: 2023-03-06 12:07:16

| Population   | Events | % Total | % Parent | Mean APC-A | Median APC-A | rSD APC-A |
|--------------|--------|---------|----------|------------|--------------|-----------|
| ● All Events | 50000  | 100.00% | 100.00%  | 620.3      | 169.1        | 289.0     |
| ● P3         | 2      | 0.00%   | 0.01%    | 74516.0    | 74516.0      | 2227.5    |
| ● P2         | 22122  | 44.24%  | 99.91%   | 1210.0     | 399.3        | 344.5     |
| ● P1         | 22143  | 44.29%  | 44.29%   | 1209.9     | 399.3        | 344.4     |

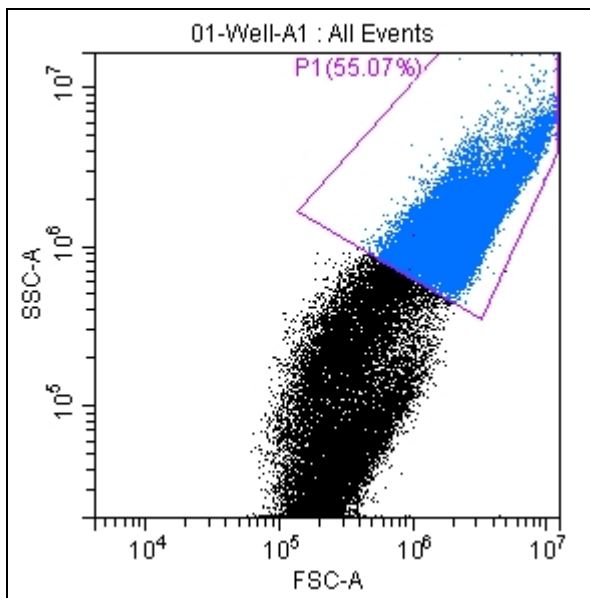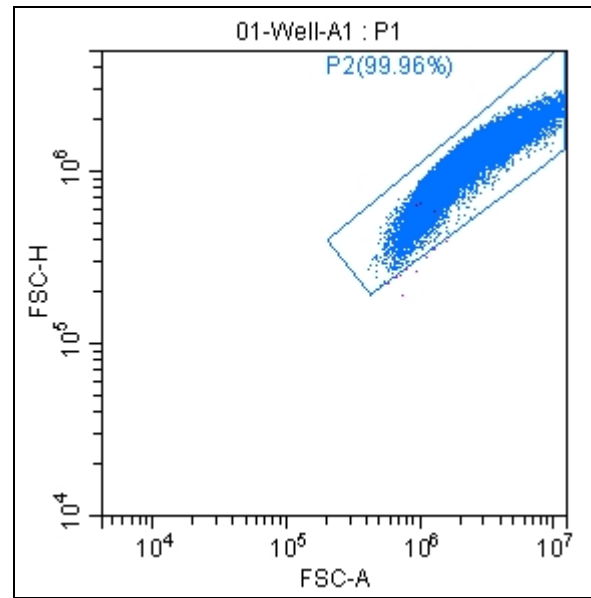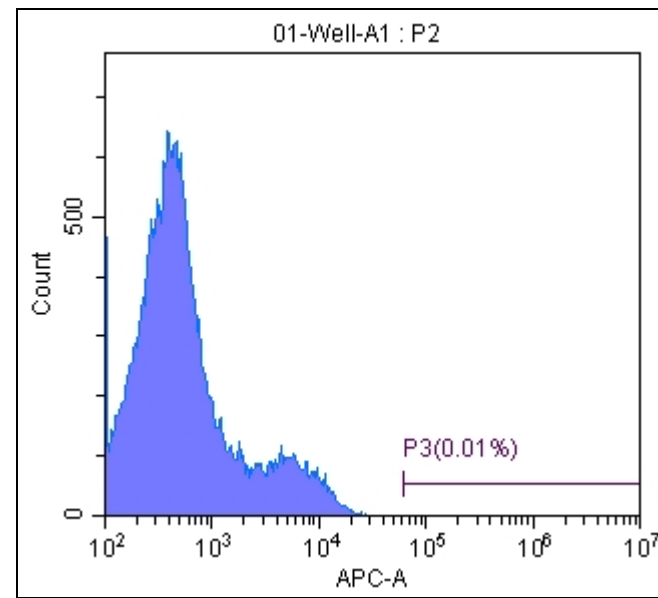

Tube Name: 01-Well-A1

Sample ID:

Record Time: 2023-03-06 12:05:59

| Population   | Events | % Total | % Parent | Mean APC-A | Median APC-A | rSD APC-A |
|--------------|--------|---------|----------|------------|--------------|-----------|
| ● All Events | 50000  | 100.00% | 100.00%  | 817.1      | 232.5        | 325.3     |
| ● P3         | 4      | 0.01%   | 0.01%    | 241253.4   | 145393.4     | 116347.7  |
| ● P2         | 27527  | 55.05%  | 99.96%   | 1312.7     | 411.0        | 344.7     |
| ● P1         | 27537  | 55.07%  | 55.07%   | 1312.8     | 411.0        | 344.7     |

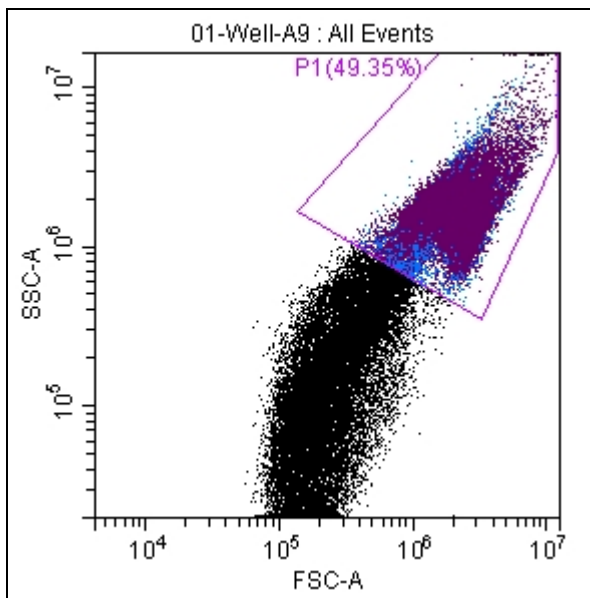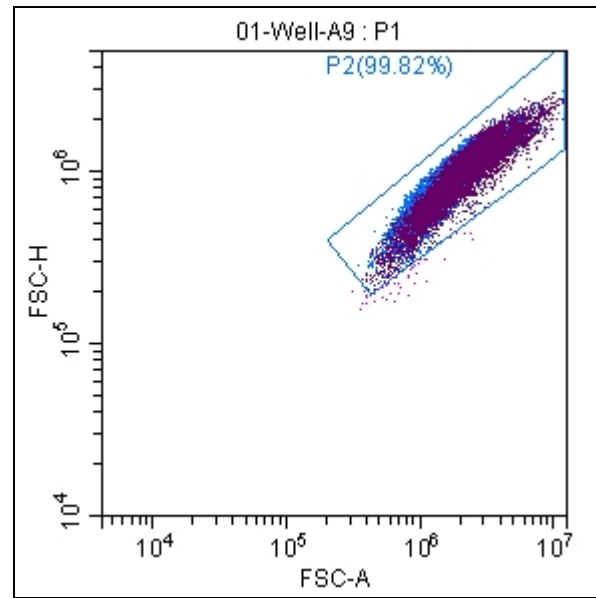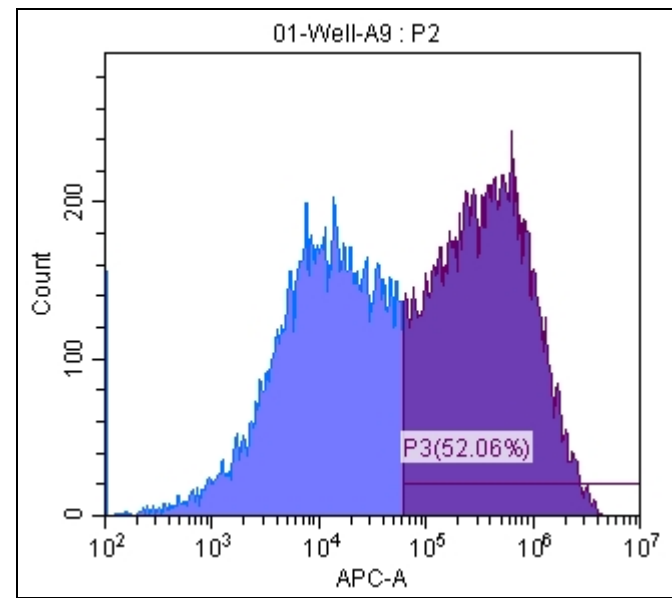

Tube Name: 01-Well-A9

Sample ID:

Record Time: 2023-03-06 12:11:06

| Population   | Events | % Total | % Parent | Mean APC-A | Median APC-A | rSD APC-A |
|--------------|--------|---------|----------|------------|--------------|-----------|
| ● All Events | 50000  | 100.00% | 100.00%  | 145847.5   | 9617.6       | 14953.9   |
| ● P3         | 12822  | 25.64%  | 52.06%   | 531424.2   | 349269.4     | 331512.6  |
| ● P2         | 24629  | 49.26%  | 99.82%   | 284397.8   | 71789.4      | 101376.0  |
| ● P1         | 24673  | 49.35%  | 49.35%   | 284184.2   | 71880.0      | 101503.1  |

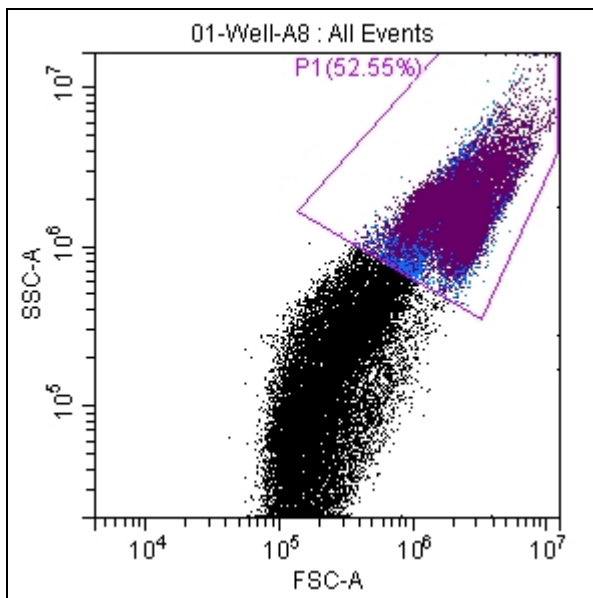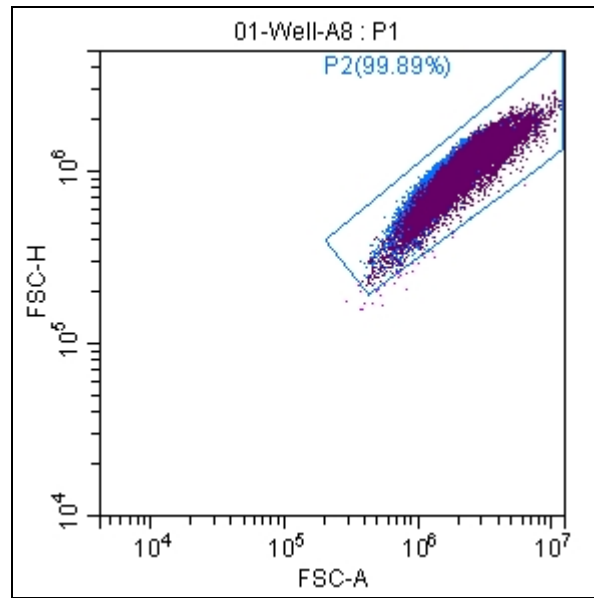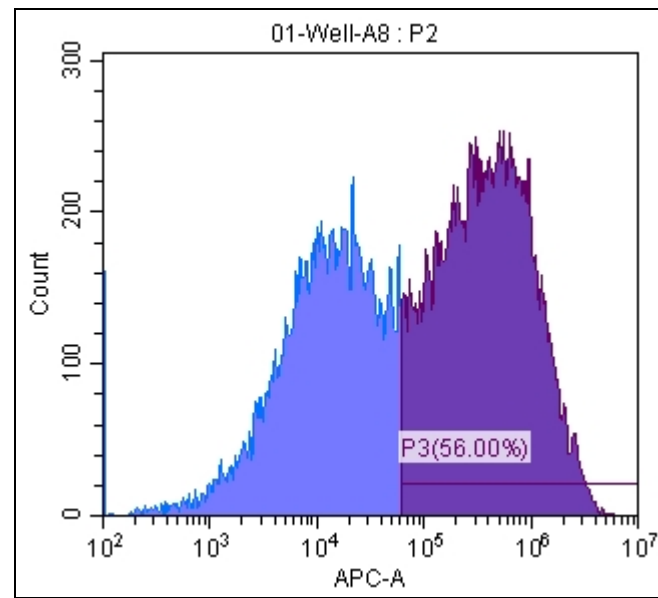

Tube Name: 01-Well-A8

Sample ID:

Record Time: 2023-03-06 12:10:25

| Population   | Events | % Total | % Parent | Mean APC-A | Median APC-A | rSD APC-A |
|--------------|--------|---------|----------|------------|--------------|-----------|
| ● All Events | 50000  | 100.00% | 100.00%  | 179216.7   | 13286.9      | 20169.0   |
| ● P3         | 14699  | 29.40%  | 56.00%   | 576010.6   | 373666.3     | 359622.9  |
| ● P2         | 26249  | 52.50%  | 99.89%   | 330035.5   | 99698.6      | 140576.9  |
| ● P1         | 26277  | 52.55%  | 52.55%   | 329894.9   | 99786.9      | 140687.8  |

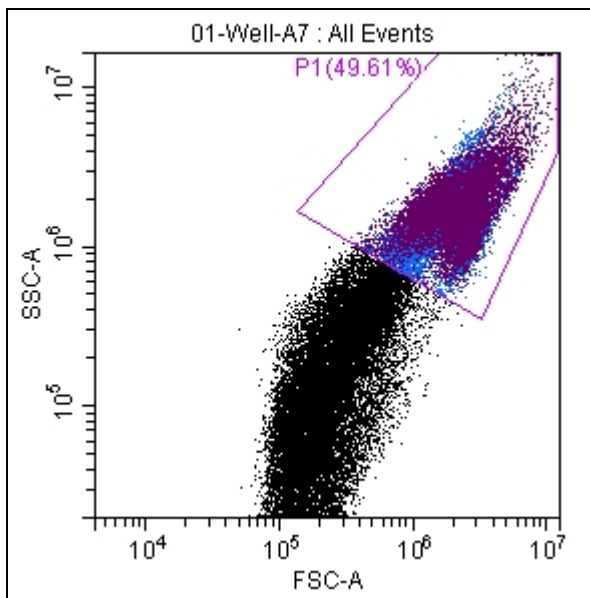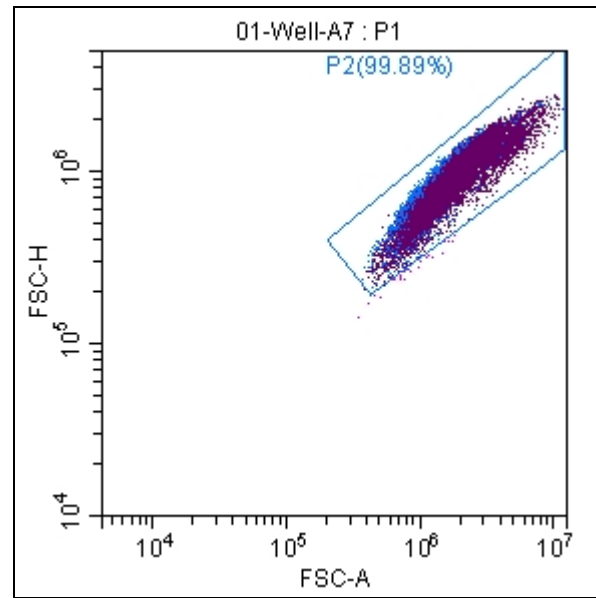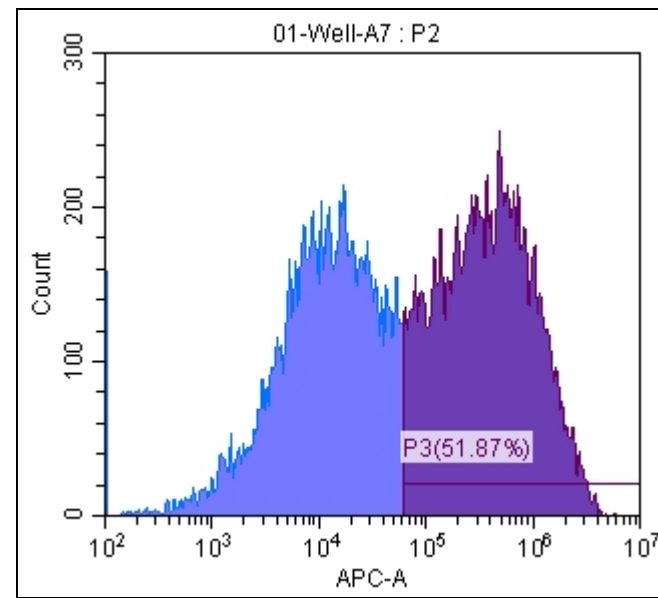

Tube Name: 01-Well-A7

Sample ID:

Record Time: 2023-03-06 12:09:48

| Population   | Events | % Total | % Parent | Mean APC-A | Median APC-A | rSD APC-A |
|--------------|--------|---------|----------|------------|--------------|-----------|
| ● All Events | 50000  | 100.00% | 100.00%  | 156721.8   | 10030.3      | 15678.8   |
| ● P3         | 12853  | 25.71%  | 51.87%   | 570146.6   | 362386.2     | 351920.2  |
| ● P2         | 24778  | 49.56%  | 99.89%   | 303486.4   | 70685.3      | 99628.0   |
| ● P1         | 24805  | 49.61%  | 49.61%   | 303395.9   | 70694.5      | 99645.0   |

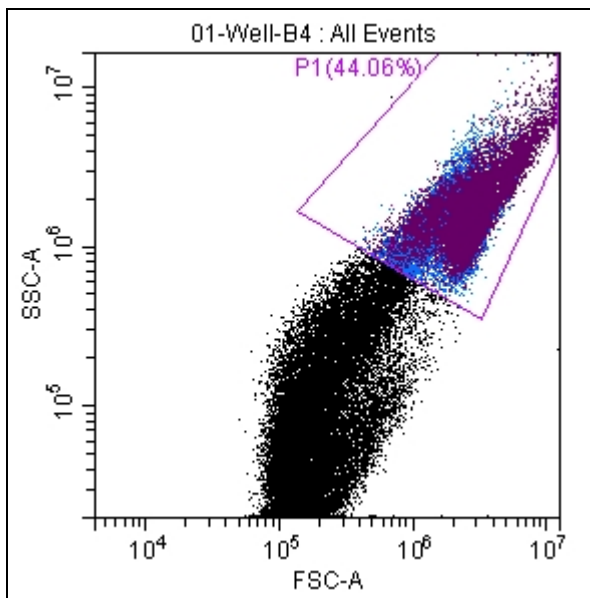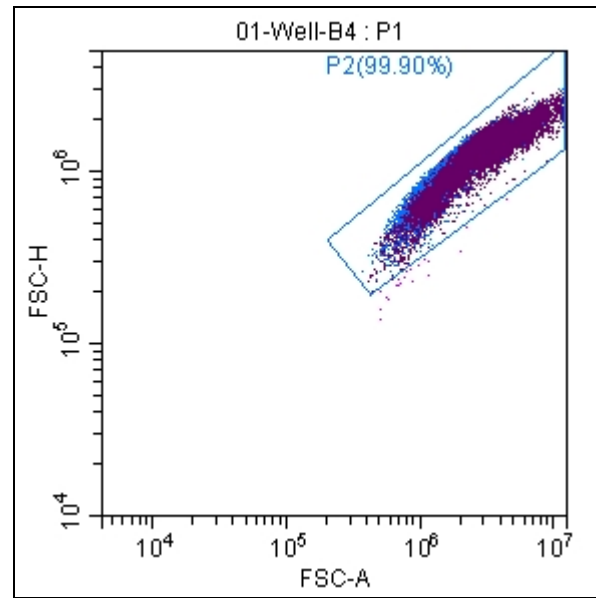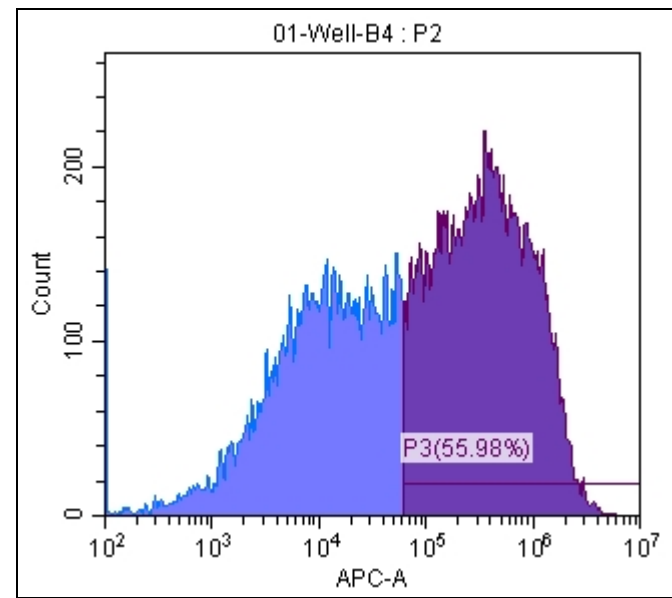

Tube Name: 01-Well-B4

Sample ID:

Record Time: 2023-03-06 12:15:39

| Population   | Events | % Total | % Parent | Mean APC-A | Median APC-A | rSD APC-A |
|--------------|--------|---------|----------|------------|--------------|-----------|
| ● All Events | 50000  | 100.00% | 100.00%  | 144162.1   | 10178.3      | 15438.7   |
| ● P3         | 12321  | 24.64%  | 55.98%   | 542290.7   | 347519.9     | 336554.4  |
| ● P2         | 22008  | 44.02%  | 99.90%   | 310763.2   | 92572.2      | 131700.1  |
| ● P1         | 22031  | 44.06%  | 44.06%   | 310610.5   | 92652.7      | 131798.7  |

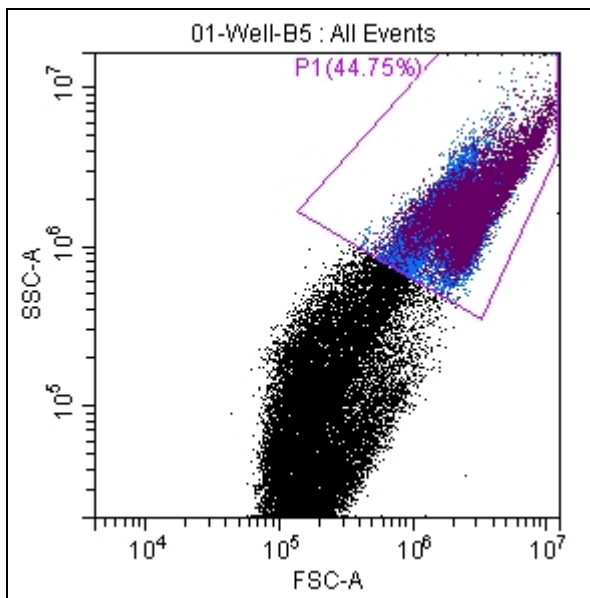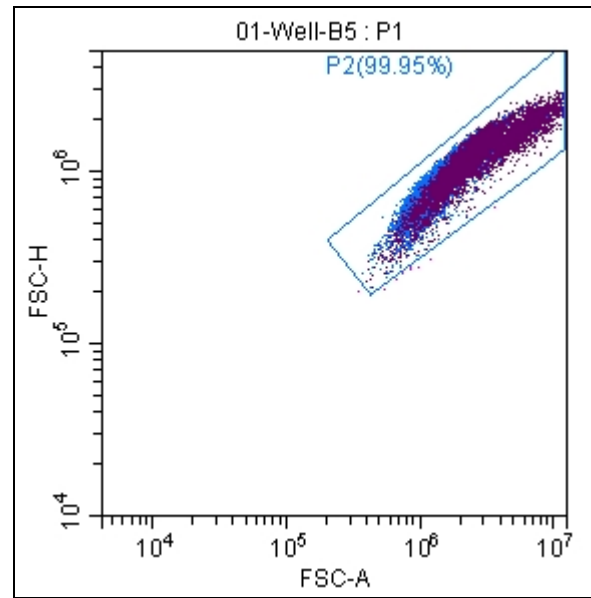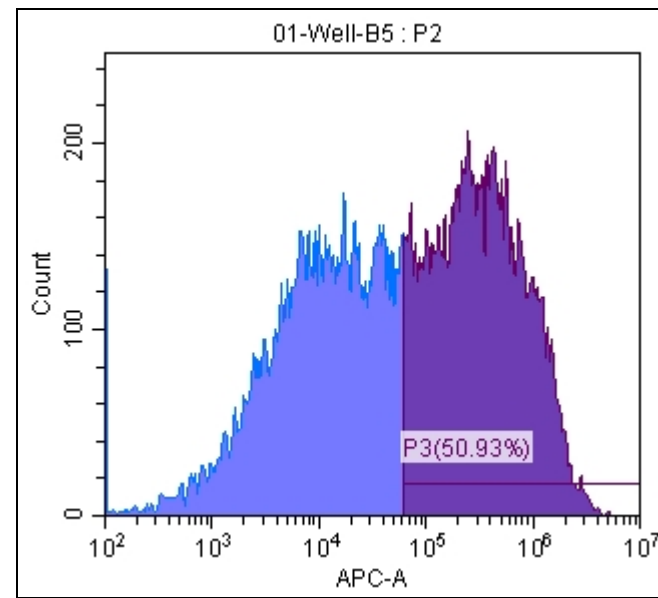

Tube Name: 01-Well-B5

Sample ID:

Record Time: 2023-03-06 12:16:17

| Population   | Events | % Total | % Parent | Mean APC-A | Median APC-A | rSD APC-A |
|--------------|--------|---------|----------|------------|--------------|-----------|
| ● All Events | 50000  | 100.00% | 100.00%  | 124512.5   | 8179.0       | 12474.9   |
| ● P3         | 11390  | 22.78%  | 50.93%   | 500318.0   | 307858.4     | 290496.9  |
| ● P2         | 22363  | 44.73%  | 99.95%   | 262669.3   | 64103.2      | 90984.8   |
| ● P1         | 22374  | 44.75%  | 44.75%   | 262681.0   | 64151.8      | 91048.6   |



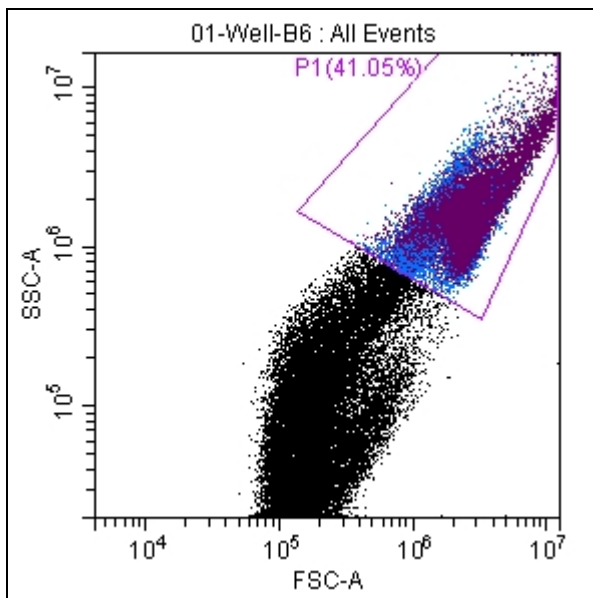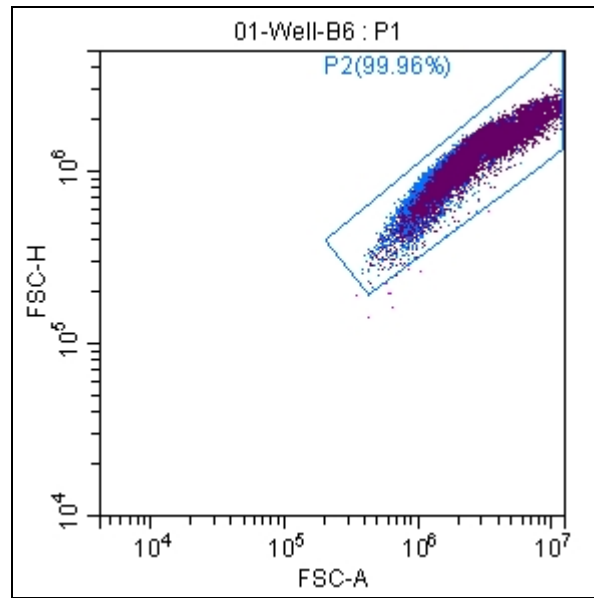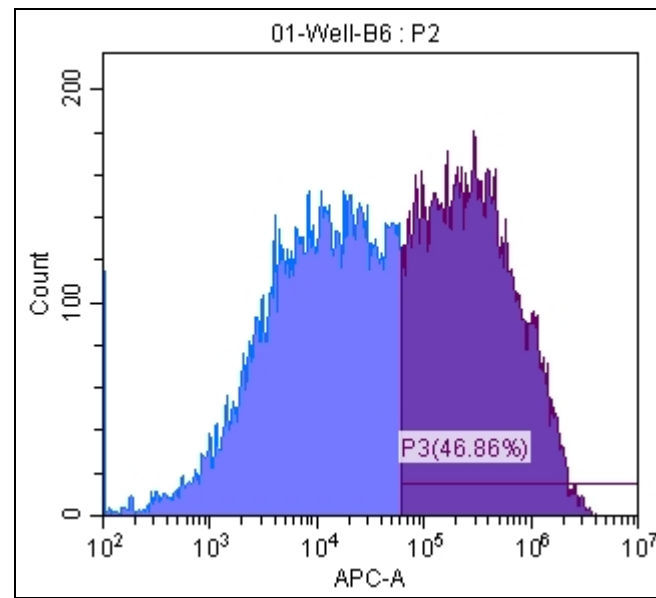

Tube Name: 01-Well-B6

Sample ID:

Record Time: 2023-03-06 12:16:55

| Population   | Events | % Total | % Parent | Mean APC-A | Median APC-A | rSD APC-A |
|--------------|--------|---------|----------|------------|--------------|-----------|
| ● All Events | 50000  | 100.00% | 100.00%  | 94103.5    | 6550.9       | 9895.2    |
| ● P3         | 9614   | 19.23%  | 46.86%   | 437805.3   | 268648.8     | 245275.6  |
| ● P2         | 20515  | 41.03%  | 99.96%   | 213512.6   | 48703.7      | 68356.6   |
| ● P1         | 20524  | 41.05%  | 41.05%   | 213470.8   | 48711.9      | 68367.1   |

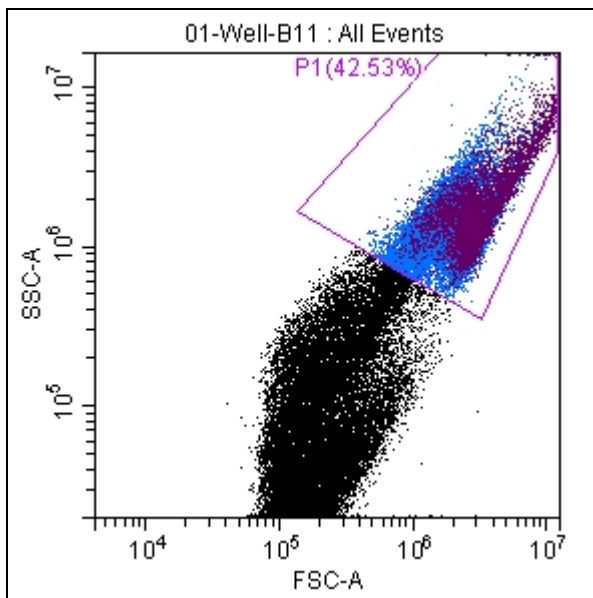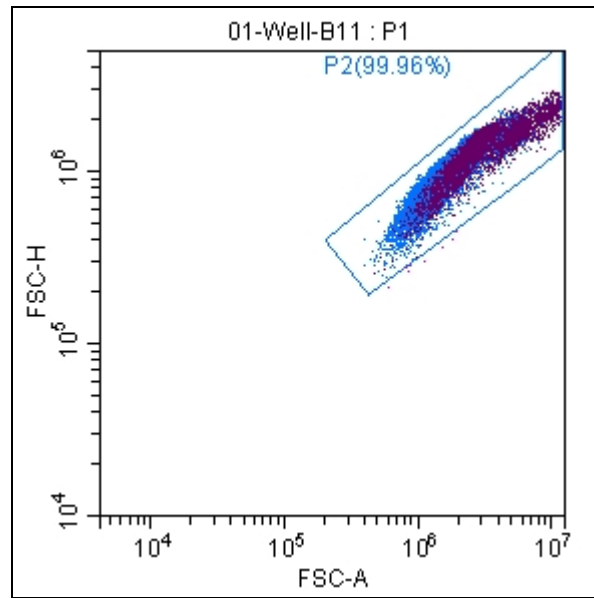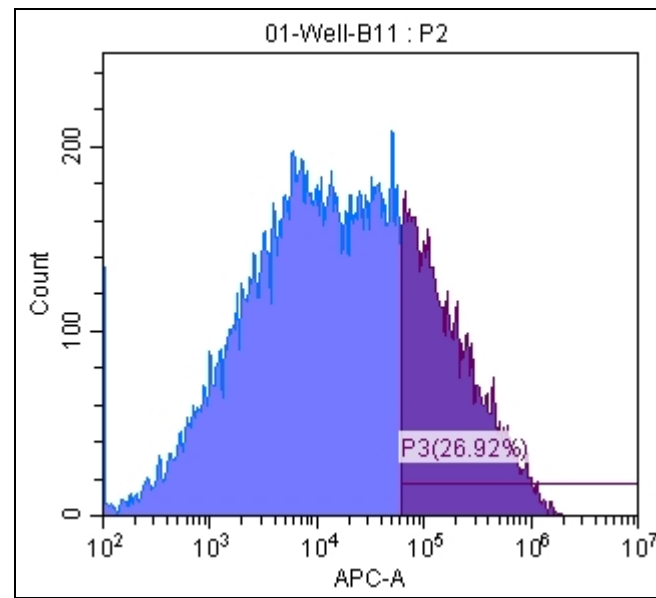

Tube Name: 01-Well-B11

Sample ID:

Record Time: 2023-03-06 12:20:01

| Population   | Events | % Total | % Parent | Mean APC-A | Median APC-A | rSD APC-A |
|--------------|--------|---------|----------|------------|--------------|-----------|
| ● All Events | 50000  | 100.00% | 100.00%  | 34173.7    | 2757.5       | 4063.8    |
| ● P3         | 5722   | 11.44%  | 26.92%   | 240292.6   | 146040.8     | 102009.7  |
| ● P2         | 21256  | 42.51%  | 99.96%   | 75053.1    | 16016.6      | 21697.3   |
| ● P1         | 21264  | 42.53%  | 42.53%   | 75033.9    | 16016.6      | 21696.5   |

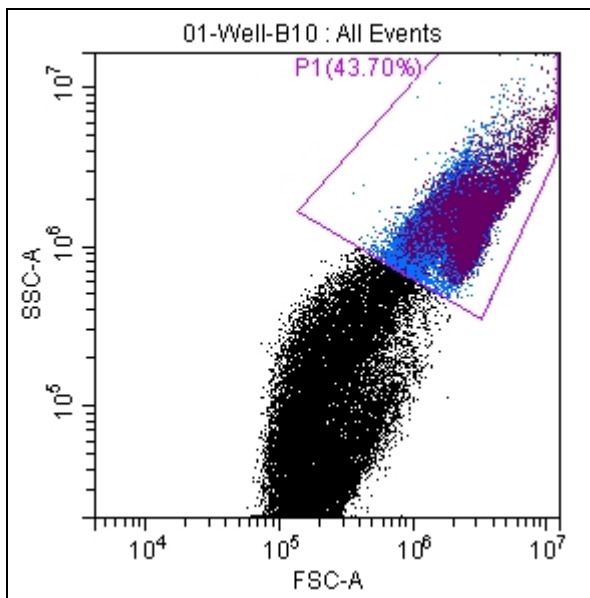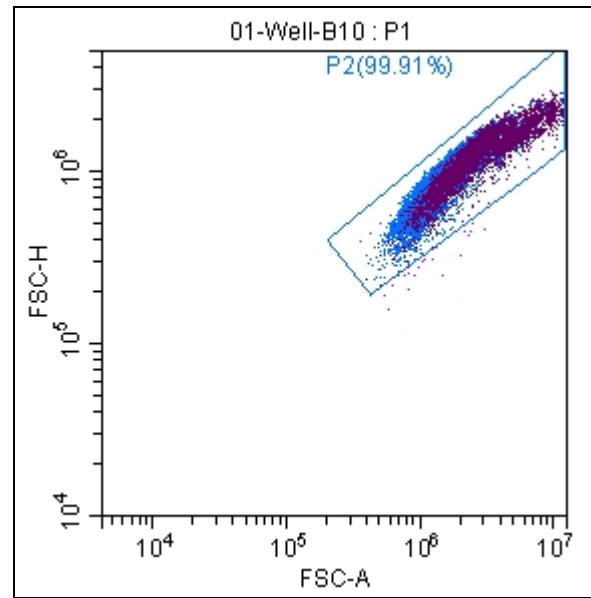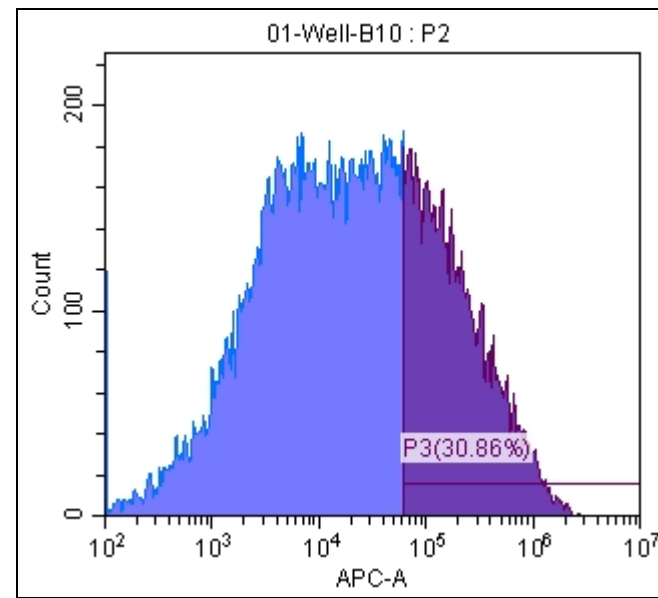

Tube Name: 01-Well-B10

Sample ID:

Record Time: 2023-03-06 12:19:24

| Population   | Events | % Total | % Parent | Mean APC-A | Median APC-A | rSD APC-A |
|--------------|--------|---------|----------|------------|--------------|-----------|
| ● All Events | 50000  | 100.00% | 100.00%  | 43769.6    | 3751.5       | 5578.9    |
| ● P3         | 6736   | 13.47%  | 30.86%   | 270549.5   | 160856.2     | 119192.4  |
| ● P2         | 21828  | 43.66%  | 99.91%   | 93618.6    | 20052.8      | 27279.8   |
| ● P1         | 21848  | 43.70%  | 43.70%   | 93597.0    | 20086.3      | 27329.5   |

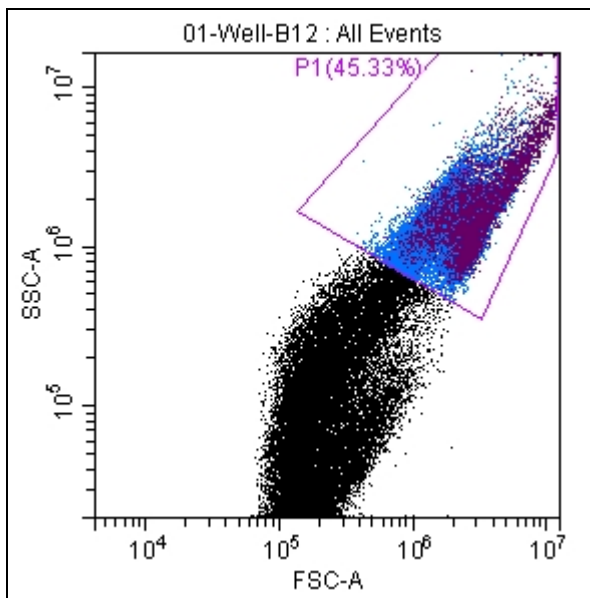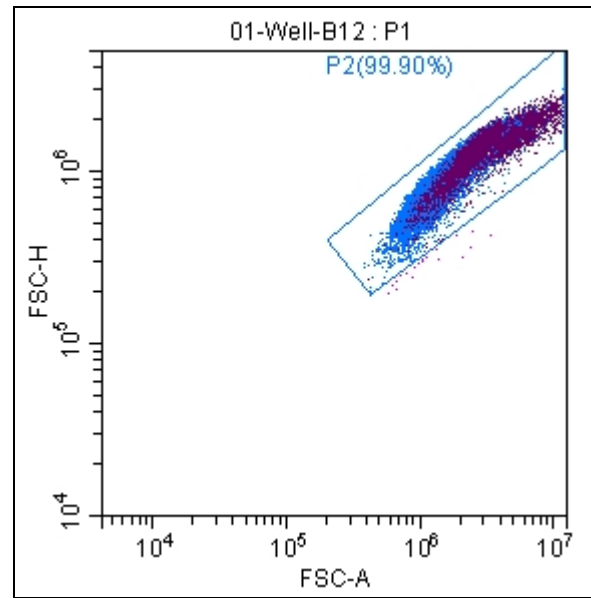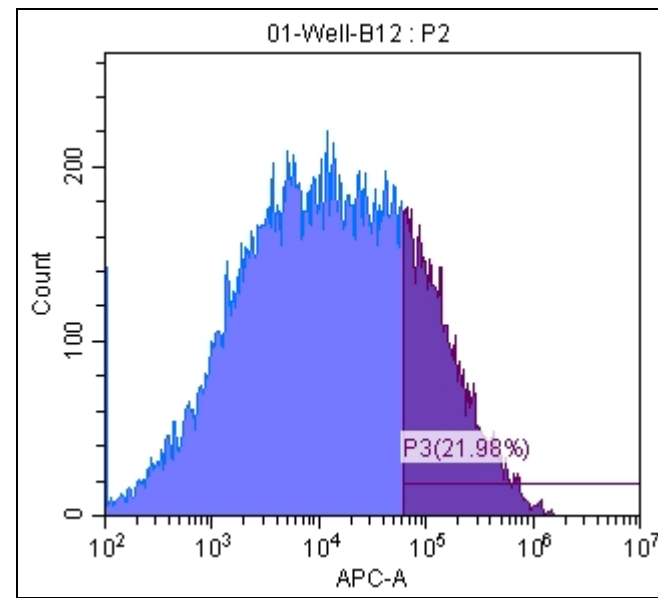

Tube Name: 01-Well-B12

Sample ID:

Record Time: 2023-03-06 12:20:40

| Population   | Events | % Total | % Parent | Mean APC-A | Median APC-A | rSD APC-A |
|--------------|--------|---------|----------|------------|--------------|-----------|
| ● All Events | 50000  | 100.00% | 100.00%  | 25717.3    | 2430.1       | 3601.8    |
| ● P3         | 4977   | 9.95%   | 21.98%   | 192719.6   | 126280.4     | 76615.7   |
| ● P2         | 22644  | 45.29%  | 99.90%   | 52675.1    | 12199.3      | 16396.0   |
| ● P1         | 22667  | 45.33%  | 45.33%   | 52659.2    | 12217.2      | 16422.9   |

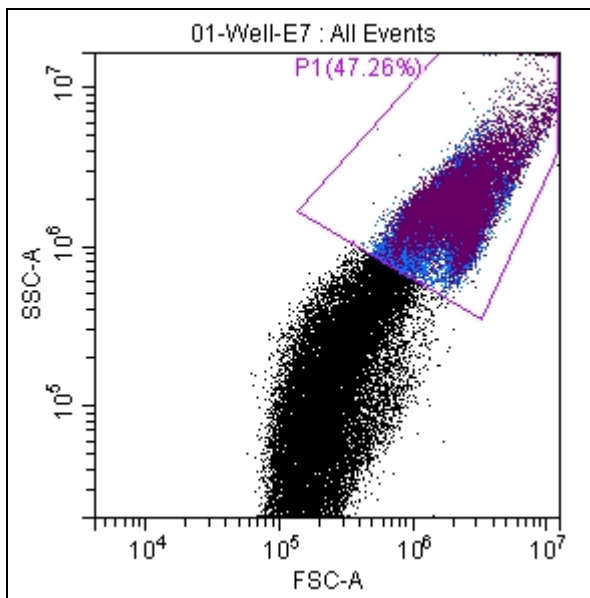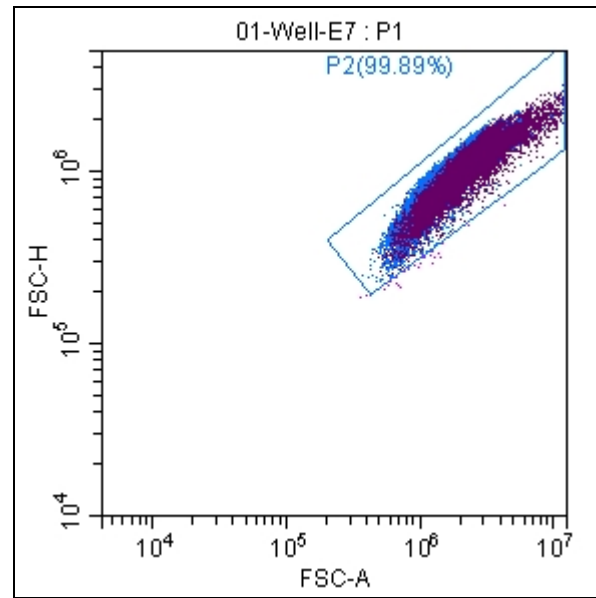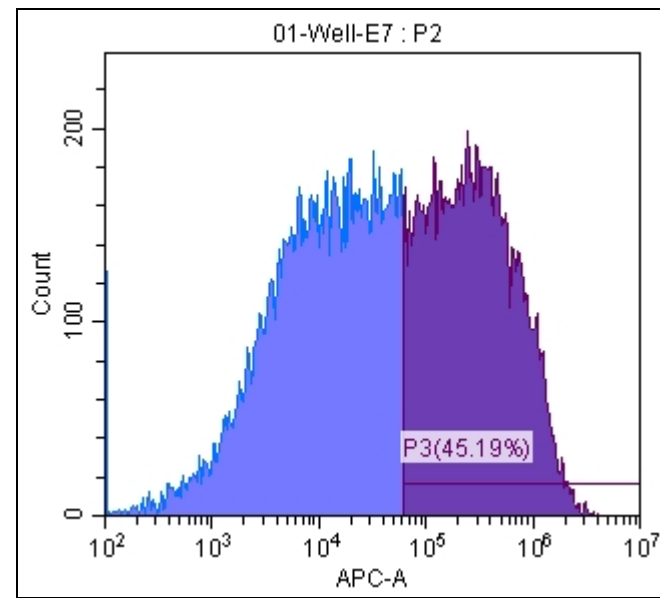

Tube Name: 01-Well-E7

Sample ID:

Record Time: 2023-03-06 12:40:42

| Population   | Events | % Total | % Parent | Mean APC-A | Median APC-A | rSD APC-A |
|--------------|--------|---------|----------|------------|--------------|-----------|
| ● All Events | 50000  | 100.00% | 100.00%  | 96681.6    | 6578.5       | 10472.9   |
| ● P3         | 10667  | 21.33%  | 45.19%   | 407628.7   | 262056.2     | 235158.0  |
| ● P2         | 23605  | 47.21%  | 99.89%   | 192971.0   | 44310.5      | 62019.1   |
| ● P1         | 23632  | 47.26%  | 47.26%   | 192862.8   | 44320.8      | 62032.9   |

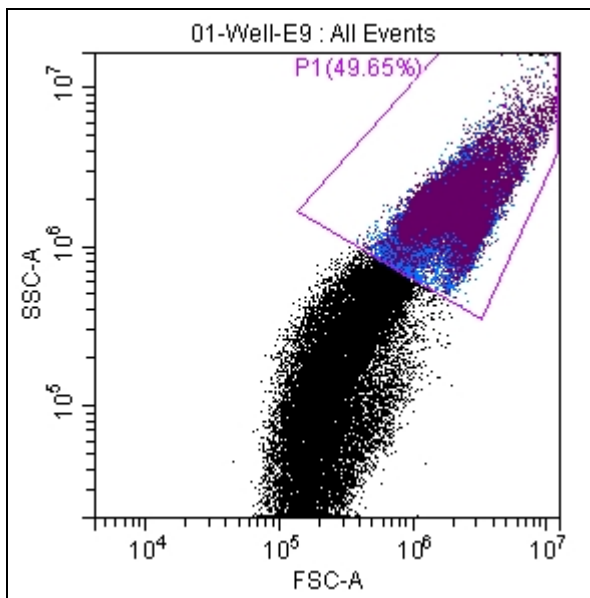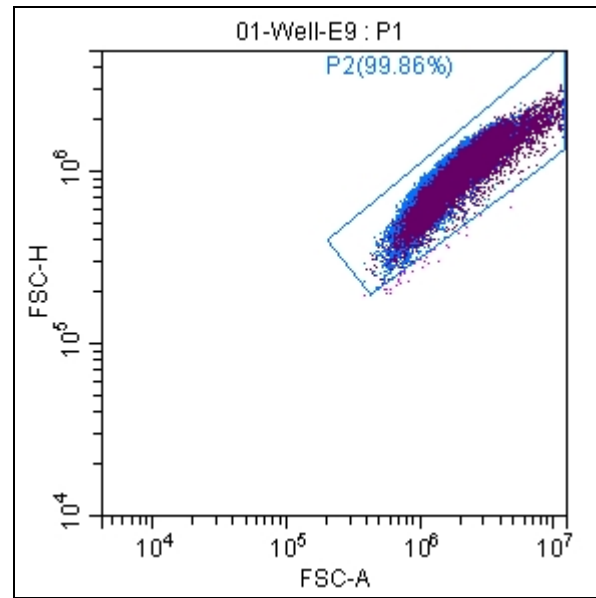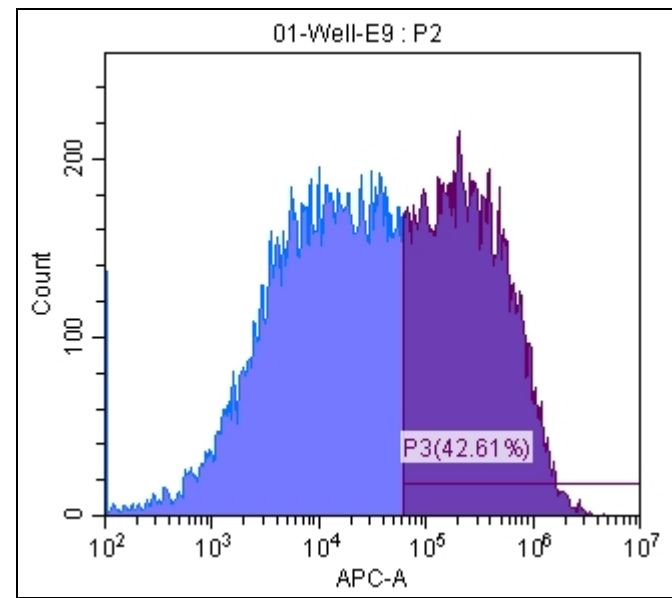

Tube Name: 01-Well-E9

Sample ID:

Record Time: 2023-03-06 12:41:59

| Population   | Events | % Total | % Parent | Mean APC-A | Median APC-A | rSD APC-A |
|--------------|--------|---------|----------|------------|--------------|-----------|
| ● All Events | 50000  | 100.00% | 100.00%  | 85477.5    | 6528.6       | 10301.1   |
| ● P3         | 10564  | 21.13%  | 42.61%   | 358104.3   | 232293.8     | 200864.4  |
| ● P2         | 24791  | 49.58%  | 99.86%   | 161362.4   | 36778.9      | 51382.9   |
| ● P1         | 24826  | 49.65%  | 49.65%   | 161313.7   | 36885.6      | 51525.6   |

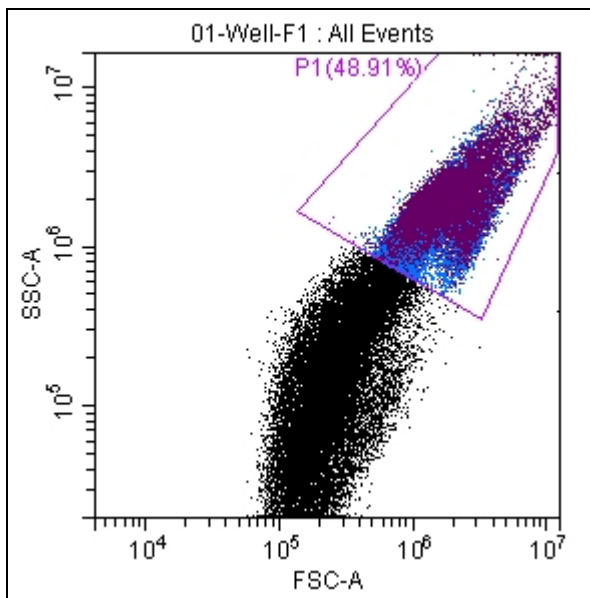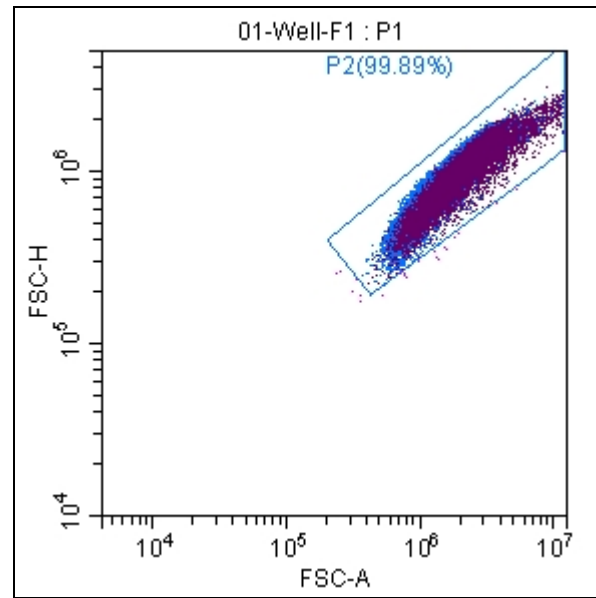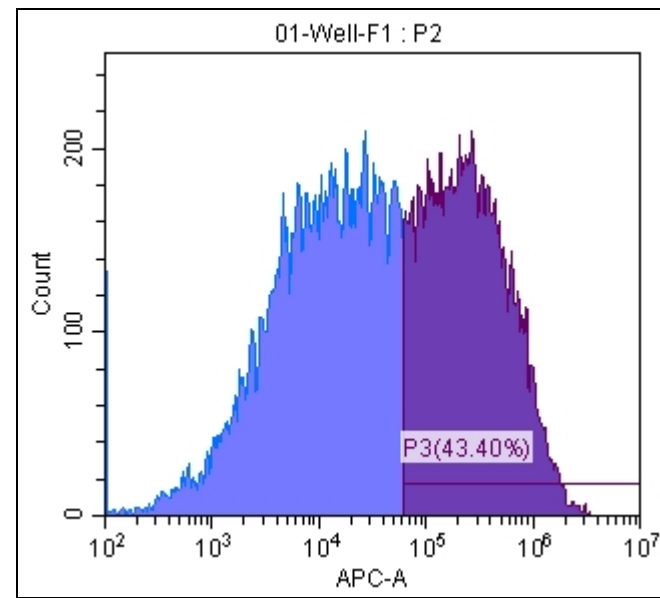

Tube Name: 01-Well-F1

Sample ID:

Record Time: 2023-03-06 12:44:33

| Population   | Events | % Total | % Parent | Mean APC-A | Median APC-A | rSD APC-A |
|--------------|--------|---------|----------|------------|--------------|-----------|
| ● All Events | 50000  | 100.00% | 100.00%  | 85276.8    | 6029.2       | 9656.7    |
| ● P3         | 10603  | 21.21%  | 43.40%   | 359301.8   | 233844.8     | 198500.7  |
| ● P2         | 24429  | 48.86%  | 99.89%   | 164971.8   | 39200.4      | 54562.5   |
| ● P1         | 24456  | 48.91%  | 48.91%   | 165065.4   | 39216.3      | 54584.3   |

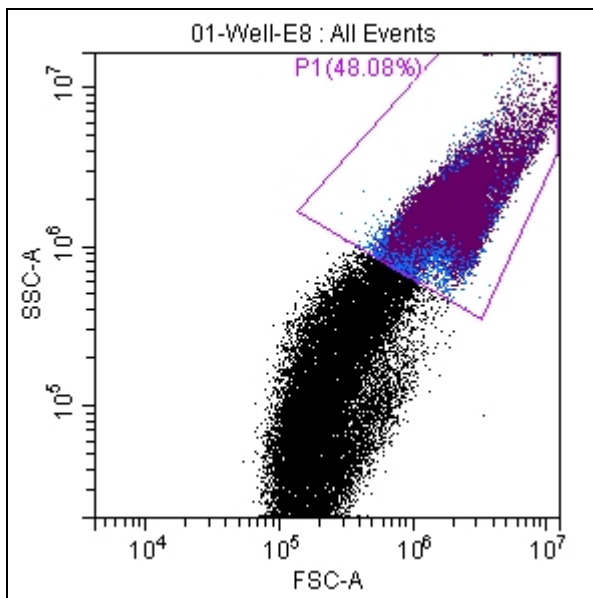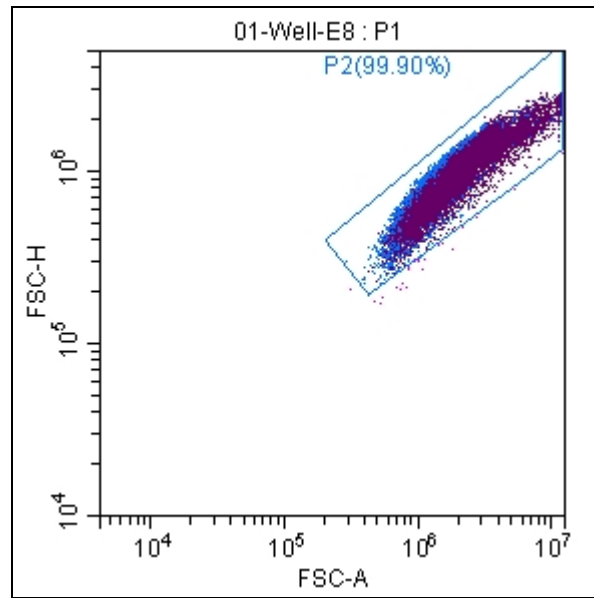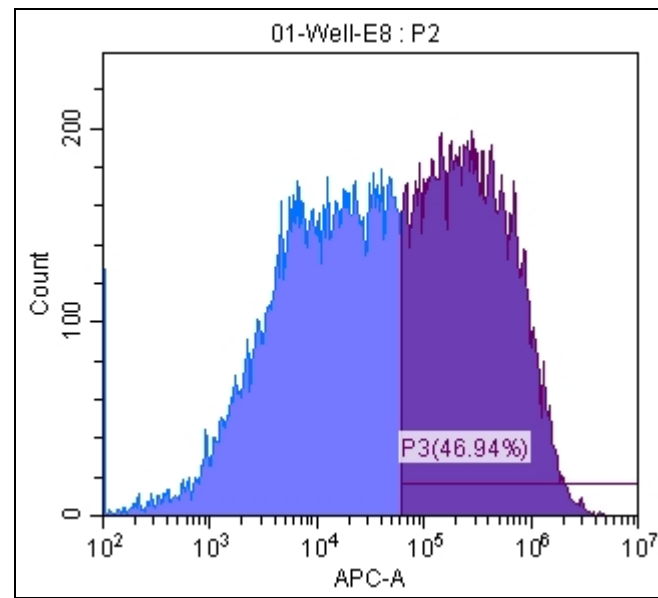

Tube Name: 01-Well-E8

Sample ID:

Record Time: 2023-03-06 12:41:20

| Population   | Events | % Total | % Parent | Mean APC-A | Median APC-A | rSD APC-A |
|--------------|--------|---------|----------|------------|--------------|-----------|
| ● All Events | 50000  | 100.00% | 100.00%  | 101858.1   | 7293.0       | 11474.2   |
| ● P3         | 11272  | 22.54%  | 46.94%   | 406560.6   | 258279.3     | 232350.0  |
| ● P2         | 24016  | 48.03%  | 99.90%   | 199289.8   | 48901.0      | 68774.0   |
| ● P1         | 24040  | 48.08%  | 48.08%   | 199347.9   | 48916.5      | 68788.1   |



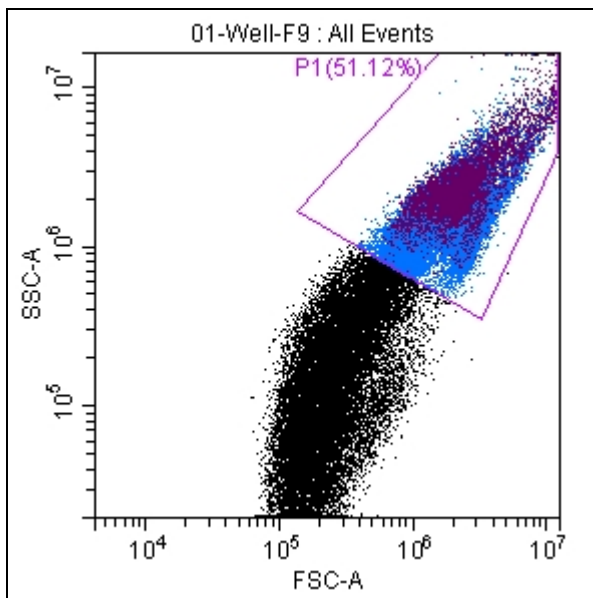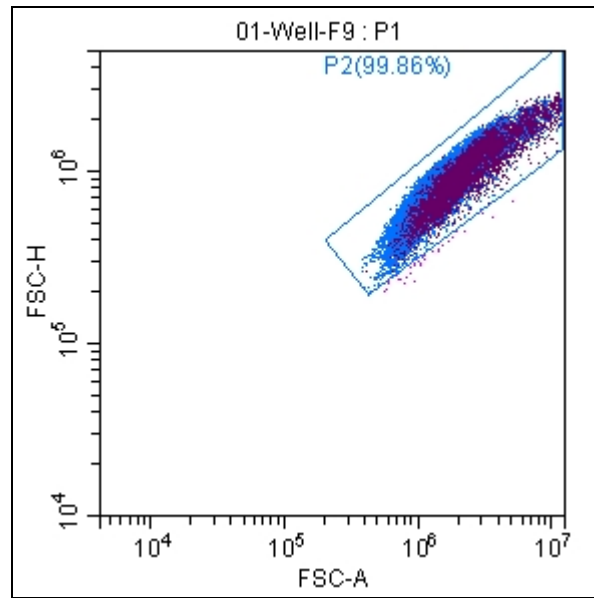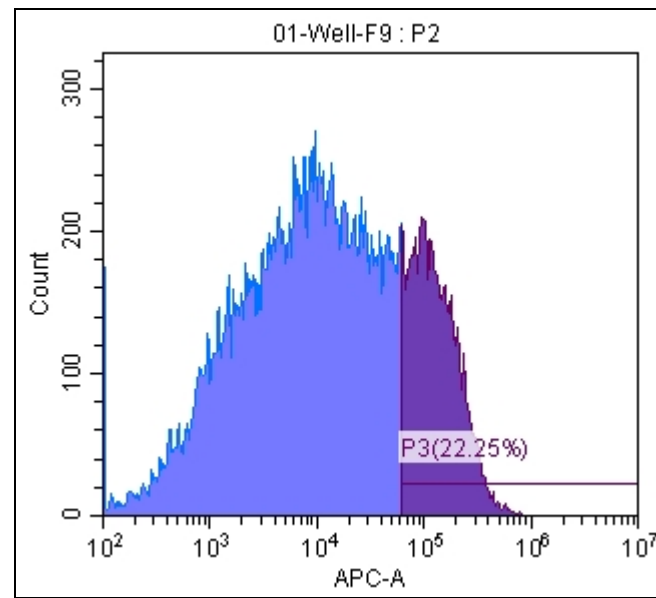

Tube Name: 01-Well-F9

Sample ID:

Record Time: 2023-03-06 12:49:50

| Population   | Events | % Total | % Parent | Mean APC-A | Median APC-A | rSD APC-A |
|--------------|--------|---------|----------|------------|--------------|-----------|
| ● All Events | 50000  | 100.00% | 100.00%  | 23358.0    | 2301.5       | 3582.7    |
| ● P3         | 5680   | 11.36%  | 22.25%   | 146419.3   | 118812.2     | 59769.5   |
| ● P2         | 25525  | 51.05%  | 99.86%   | 42687.9    | 12003.7      | 16084.7   |
| ● P1         | 25560  | 51.12%  | 51.12%   | 42711.8    | 12023.7      | 16112.6   |

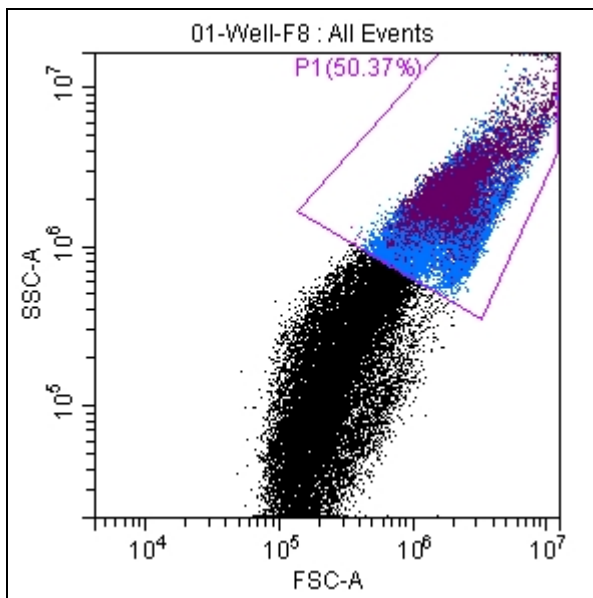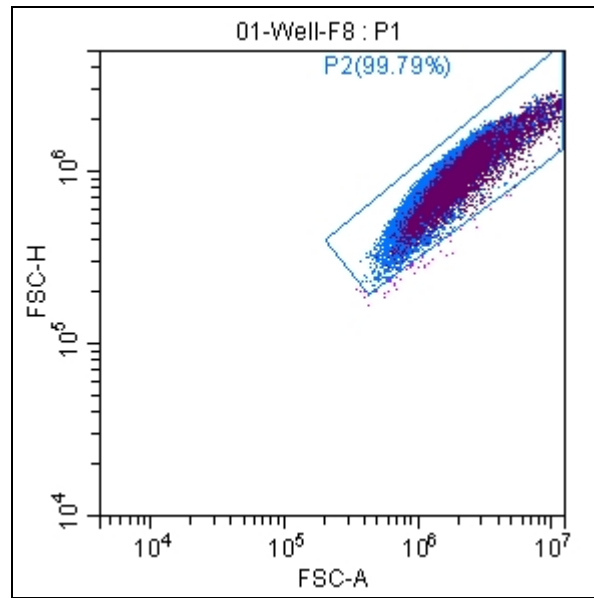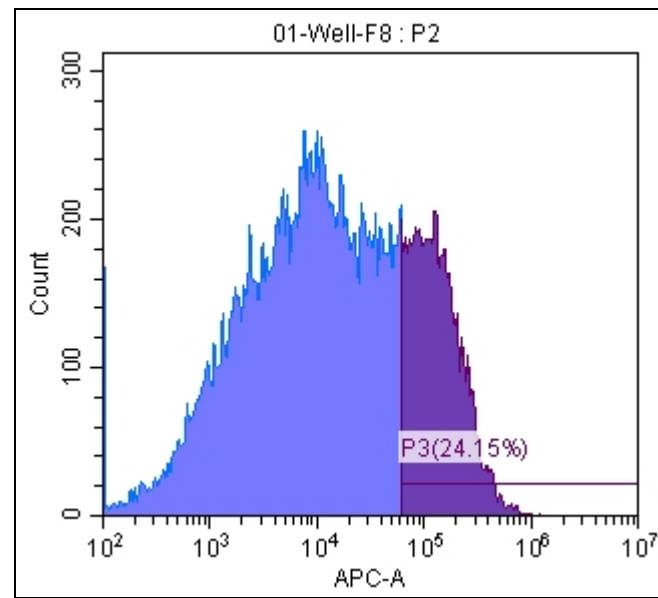

Tube Name: 01-Well-F8

Sample ID:

Record Time: 2023-03-06 12:49:10

| Population   | Events | % Total | % Parent | Mean APC-A | Median APC-A | rSD APC-A |
|--------------|--------|---------|----------|------------|--------------|-----------|
| ● All Events | 50000  | 100.00% | 100.00%  | 25960.6    | 2623.5       | 4024.4    |
| ● P3         | 6069   | 12.14%  | 24.15%   | 156676.7   | 124767.4     | 65407.1   |
| ● P2         | 25130  | 50.26%  | 99.79%   | 47967.5    | 13104.9      | 17589.5   |
| ● P1         | 25183  | 50.37%  | 50.37%   | 47987.7    | 13125.3      | 17618.0   |

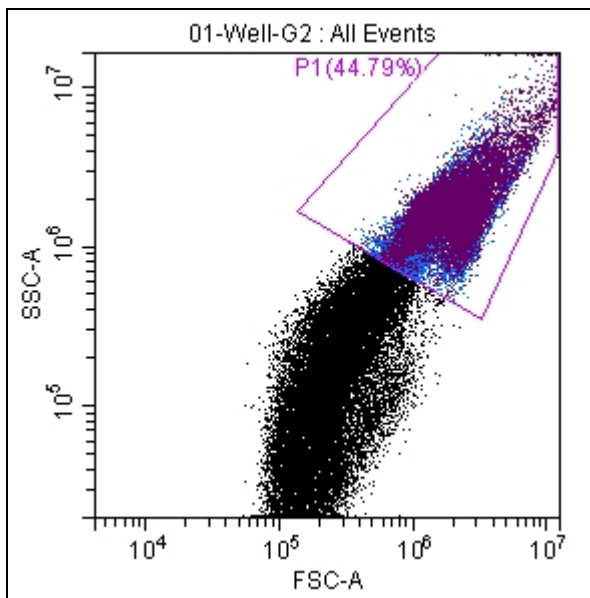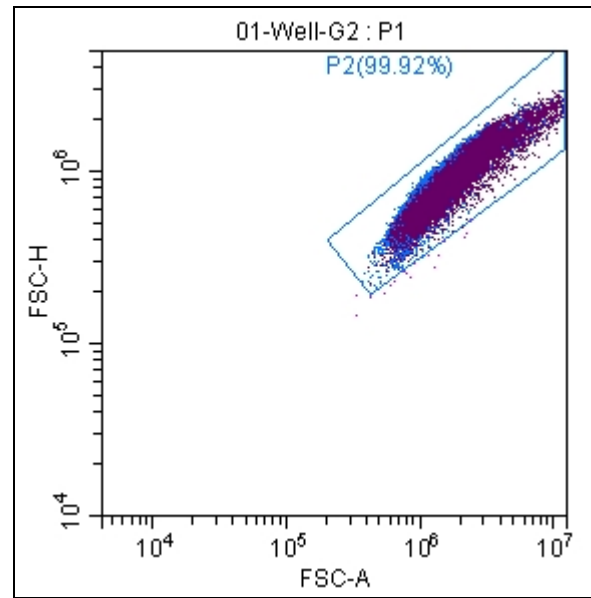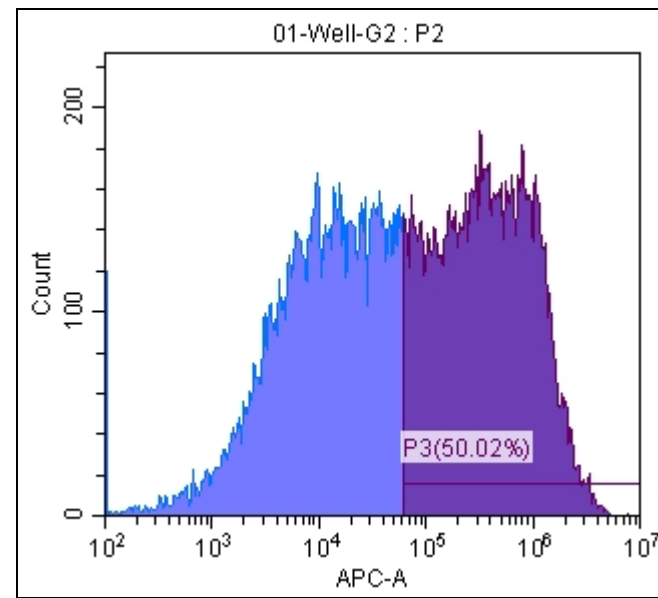

Tube Name: 01-Well-G2

Sample ID:

Record Time: 2023-03-06 12:53:09

| Population   | Events | % Total | % Parent | Mean APC-A | Median APC-A | rSD APC-A |
|--------------|--------|---------|----------|------------|--------------|-----------|
| ● All Events | 50000  | 100.00% | 100.00%  | 141133.3   | 7090.5       | 11957.2   |
| ● P3         | 11194  | 22.39%  | 50.02%   | 564186.2   | 349380.1     | 354726.9  |
| ● P2         | 22377  | 44.75%  | 99.92%   | 290271.5   | 60358.7      | 85673.5   |
| ● P1         | 22395  | 44.79%  | 44.79%   | 290160.2   | 60380.7      | 85705.0   |

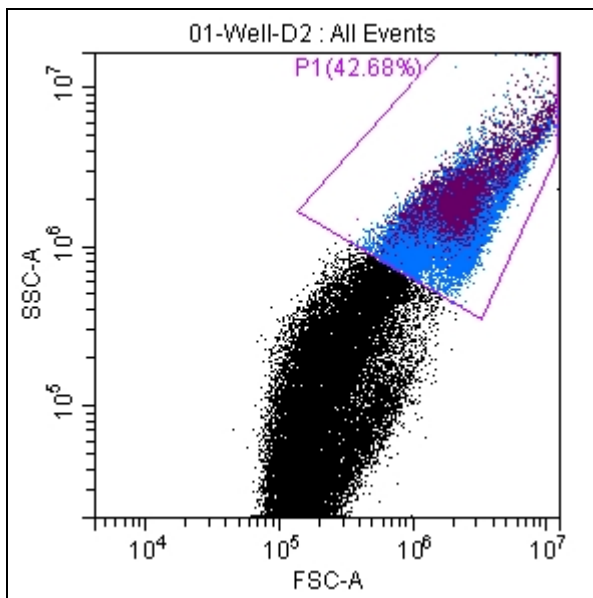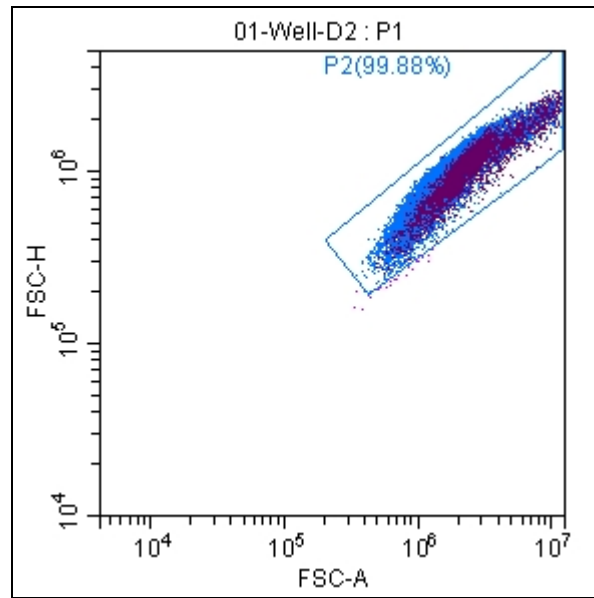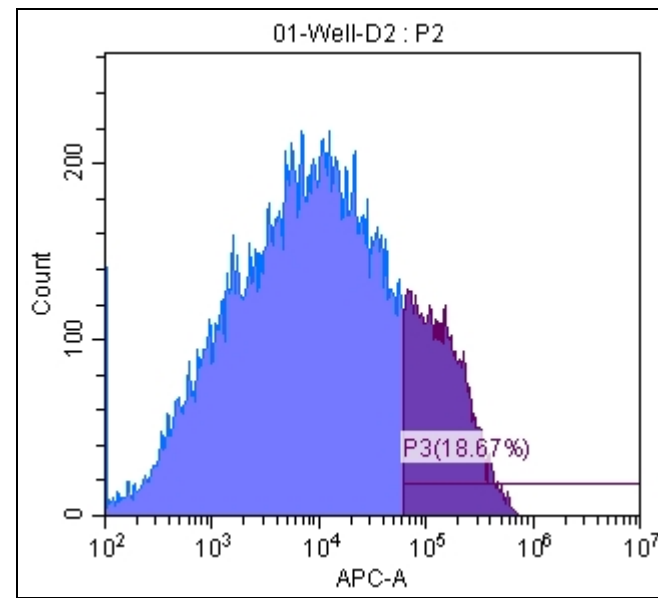

Tube Name: 01-Well-D2

Sample ID:

Record Time: 2023-03-06 12:29:39

| Population   | Events | % Total | % Parent | Mean APC-A | Median APC-A | rSD APC-A |
|--------------|--------|---------|----------|------------|--------------|-----------|
| ● All Events | 50000  | 100.00% | 100.00%  | 18578.0    | 1276.9       | 2078.0    |
| ● P3         | 3979   | 7.96%   | 18.67%   | 163030.5   | 130756.7     | 75734.8   |
| ● P2         | 21315  | 42.63%  | 99.88%   | 40170.7    | 9959.7       | 13193.5   |
| ● P1         | 21341  | 42.68%  | 42.68%   | 40227.6    | 9974.0       | 13215.2   |

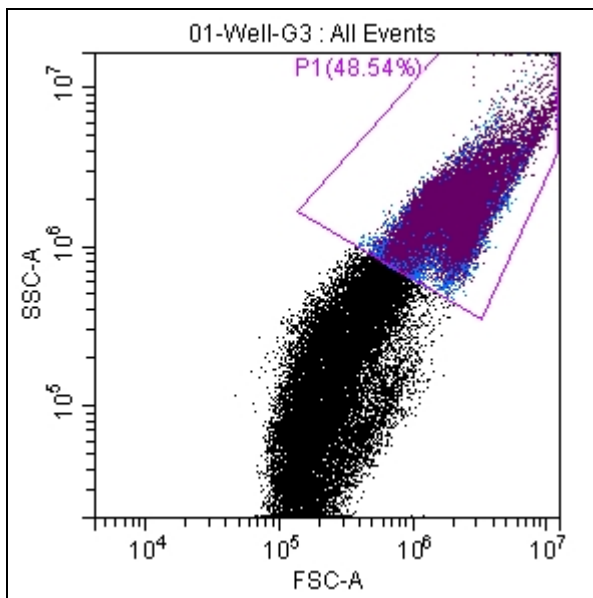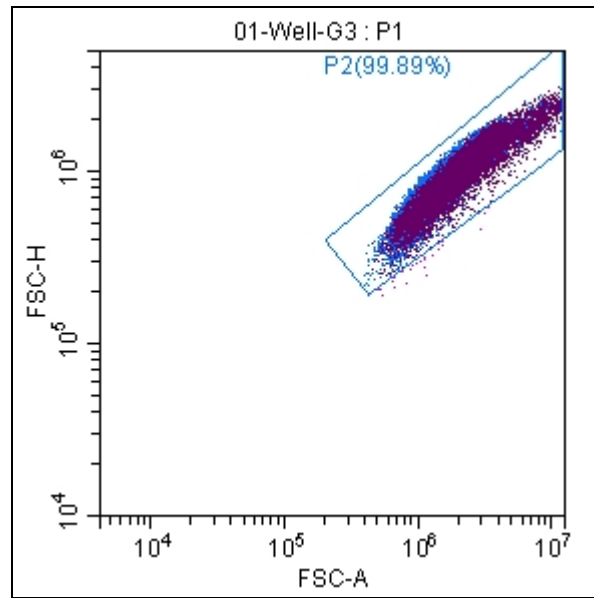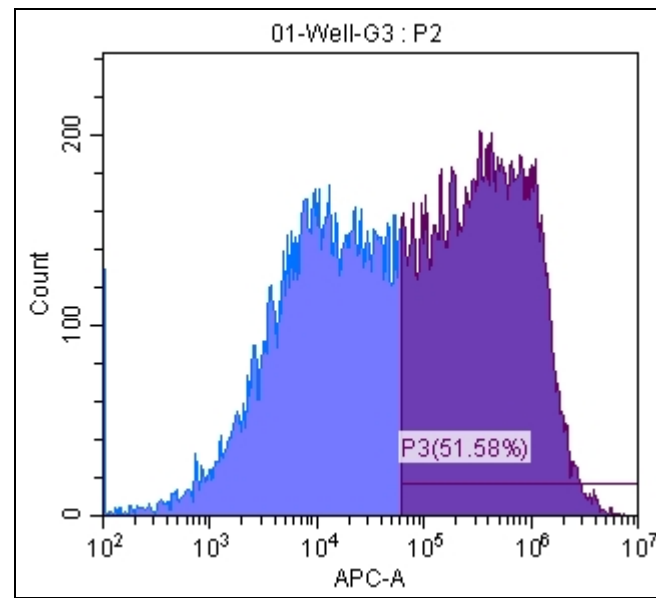

Tube Name: 01-Well-G3

Sample ID:

Record Time: 2023-03-06 12:53:49

| Population   | Events | % Total | % Parent | Mean APC-A | Median APC-A | rSD APC-A |
|--------------|--------|---------|----------|------------|--------------|-----------|
| ● All Events | 50000  | 100.00% | 100.00%  | 155219.6   | 9628.1       | 15356.7   |
| ● P3         | 12504  | 25.01%  | 51.58%   | 563027.8   | 358698.1     | 359765.6  |
| ● P2         | 24243  | 48.49%  | 99.89%   | 297992.5   | 67704.5      | 96545.7   |
| ● P1         | 24269  | 48.54%  | 48.54%   | 297940.3   | 67767.6      | 96630.5   |

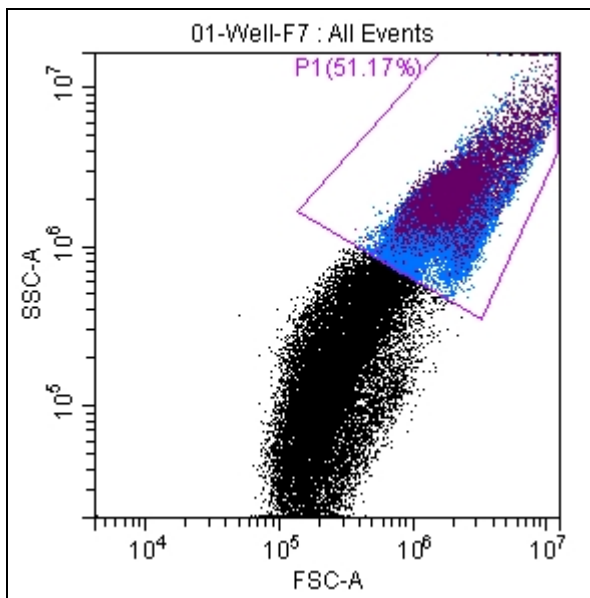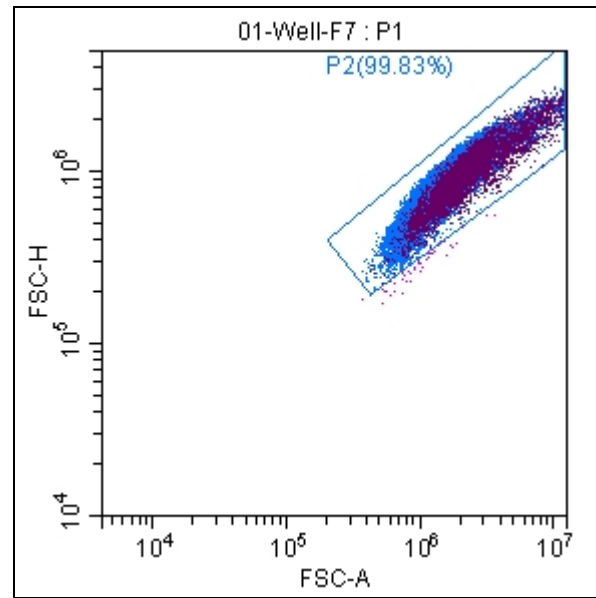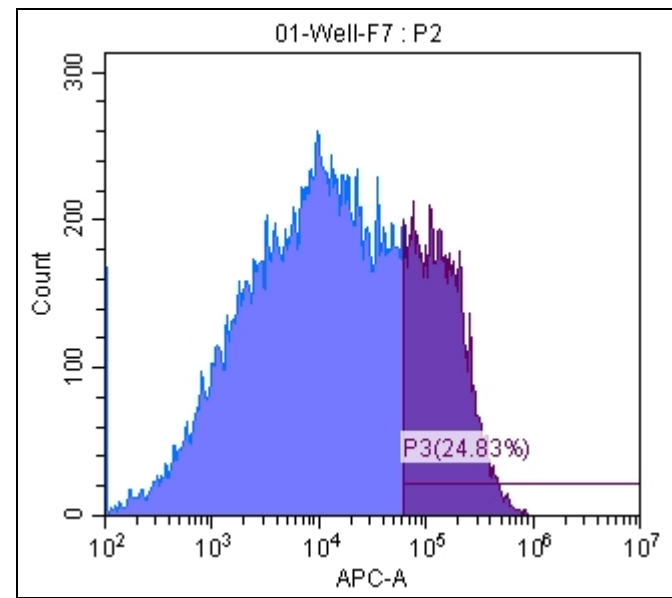

Tube Name: 01-Well-F7

Sample ID:

Record Time: 2023-03-06 12:48:31

| Population   | Events | % Total | % Parent | Mean APC-A | Median APC-A | rSD APC-A |
|--------------|--------|---------|----------|------------|--------------|-----------|
| ● All Events | 50000  | 100.00% | 100.00%  | 27671.1    | 2906.3       | 4439.4    |
| ● P3         | 6343   | 12.69%  | 24.83%   | 161616.3   | 130386.8     | 73565.0   |
| ● P2         | 25541  | 51.08%  | 99.83%   | 50241.2    | 13921.1      | 18598.2   |
| ● P1         | 25584  | 51.17%  | 51.17%   | 50238.3    | 13937.7      | 18622.6   |

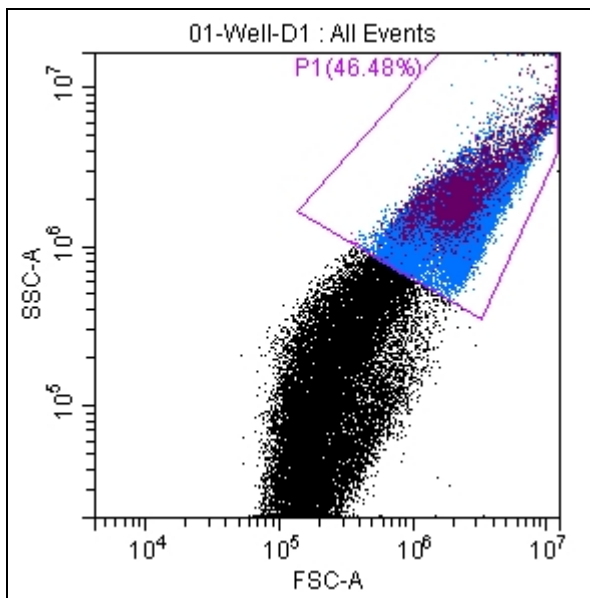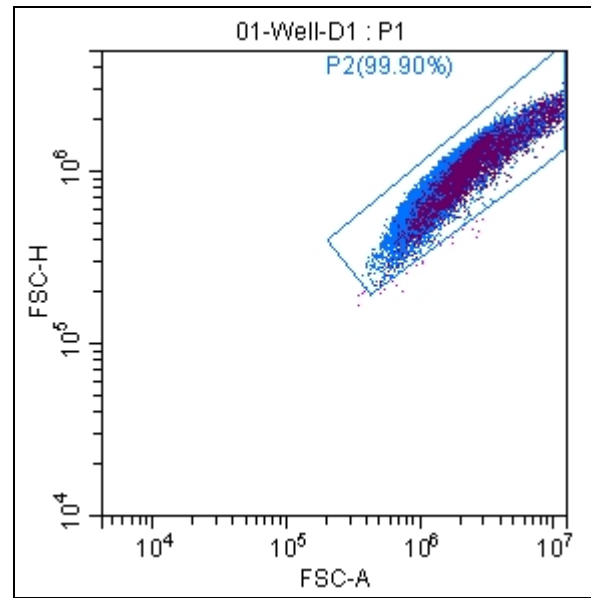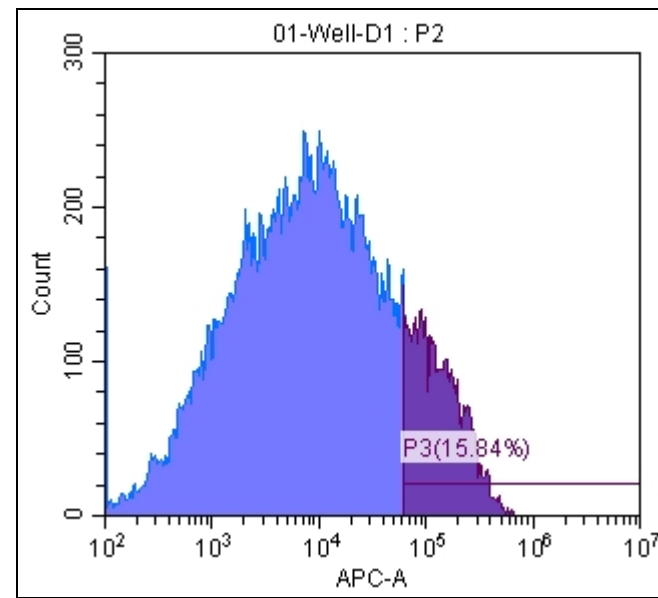

Tube Name: 01-Well-D1

Sample ID:

Record Time: 2023-03-06 12:29:02

| Population   | Events | % Total | % Parent | Mean APC-A | Median APC-A | rSD APC-A |
|--------------|--------|---------|----------|------------|--------------|-----------|
| ● All Events | 50000  | 100.00% | 100.00%  | 16885.8    | 1534.9       | 2425.9    |
| ● P3         | 3678   | 7.36%   | 15.84%   | 150618.2   | 120455.8     | 64941.1   |
| ● P2         | 23217  | 46.43%  | 99.90%   | 33639.1    | 8677.5       | 11297.6   |
| ● P1         | 23241  | 46.48%  | 46.48%   | 33658.4    | 8688.7       | 11313.7   |

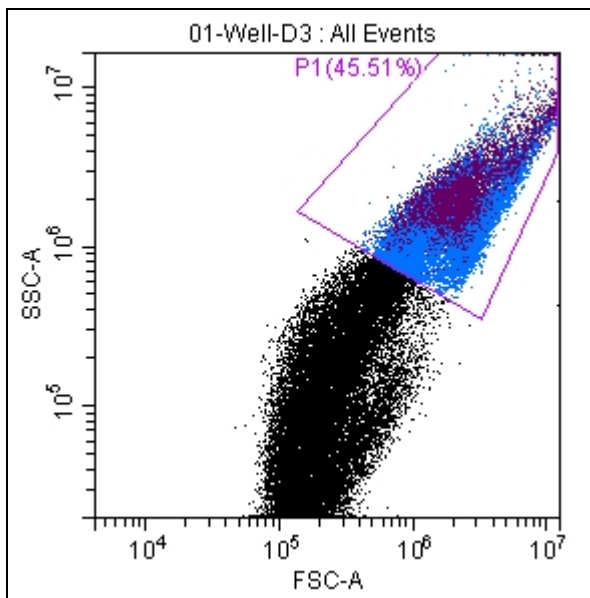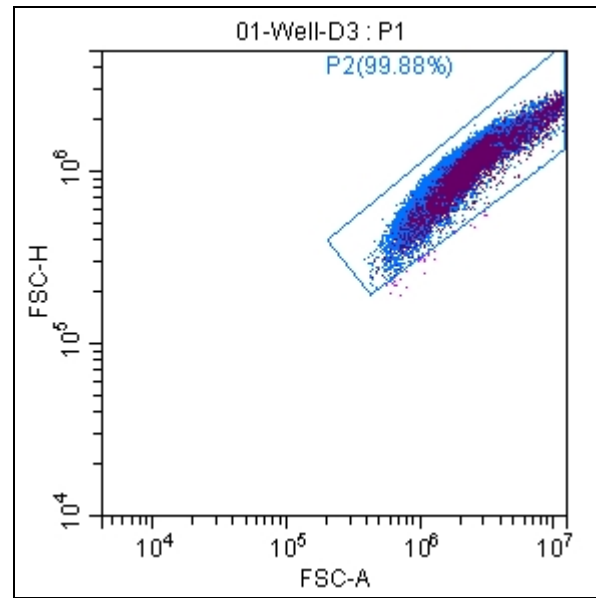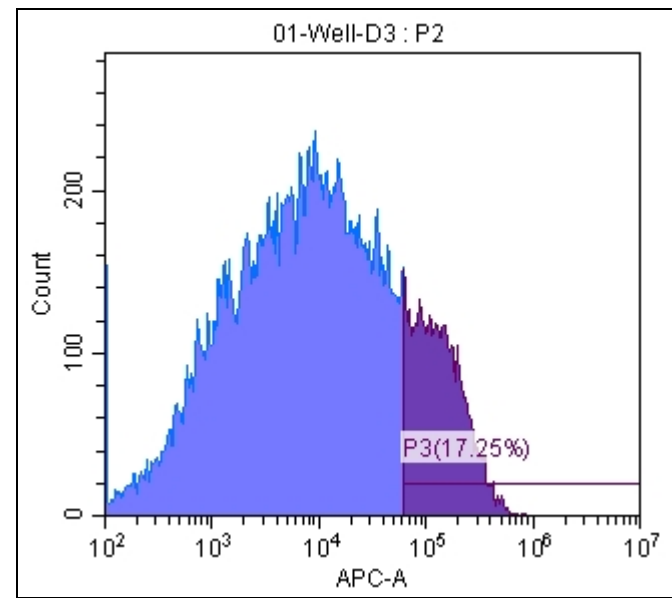

Tube Name: 01-Well-D3

Sample ID:

Record Time: 2023-03-06 12:30:20

| Population   | Events | % Total | % Parent | Mean APC-A | Median APC-A | rSD APC-A |
|--------------|--------|---------|----------|------------|--------------|-----------|
| ● All Events | 50000  | 100.00% | 100.00%  | 17650.9    | 1396.8       | 2250.3    |
| ● P3         | 3920   | 7.84%   | 17.25%   | 153365.3   | 125063.0     | 67375.3   |
| ● P2         | 22725  | 45.45%  | 99.88%   | 36147.1    | 8932.0       | 11879.0   |
| ● P1         | 22753  | 45.51%  | 45.51%   | 36169.1    | 8932.0       | 11878.6   |



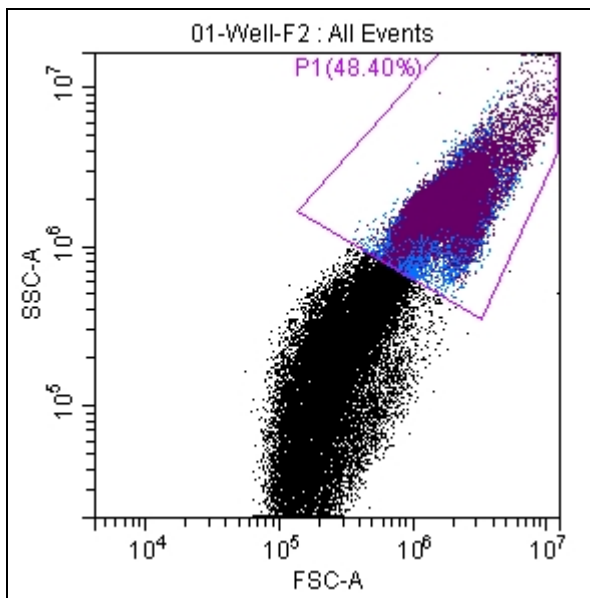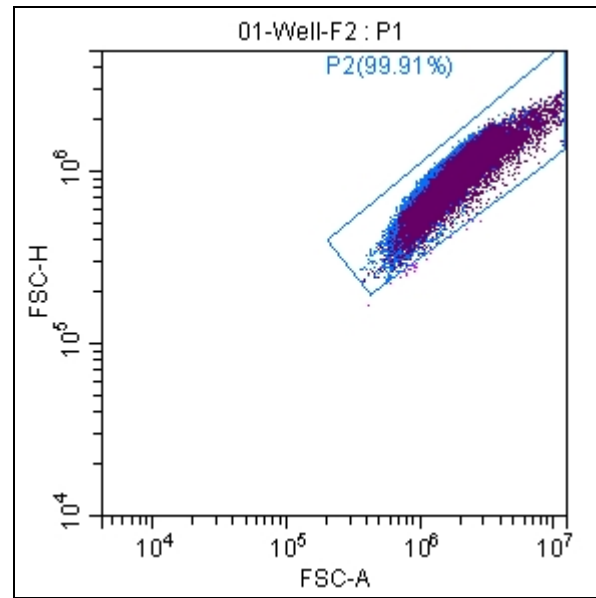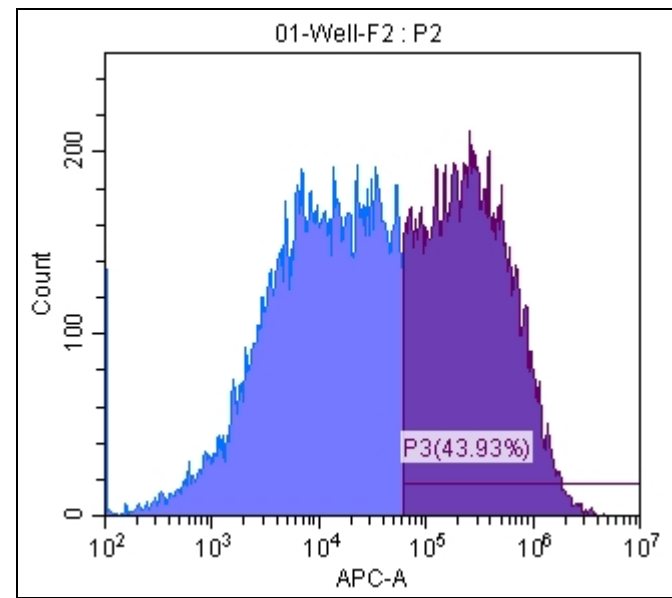

Tube Name: 01-Well-F2

Sample ID:

Record Time: 2023-03-06 12:45:14

| Population   | Events | % Total | % Parent | Mean APC-A | Median APC-A | rSD APC-A |
|--------------|--------|---------|----------|------------|--------------|-----------|
| ● All Events | 50000  | 100.00% | 100.00%  | 88869.9    | 5838.6       | 9417.7    |
| ● P3         | 10622  | 21.24%  | 43.93%   | 376275.6   | 246557.0     | 213385.2  |
| ● P2         | 24180  | 48.36%  | 99.91%   | 173937.0   | 39392.9      | 55054.8   |
| ● P1         | 24201  | 48.40%  | 48.40%   | 173889.9   | 39395.5      | 55048.6   |

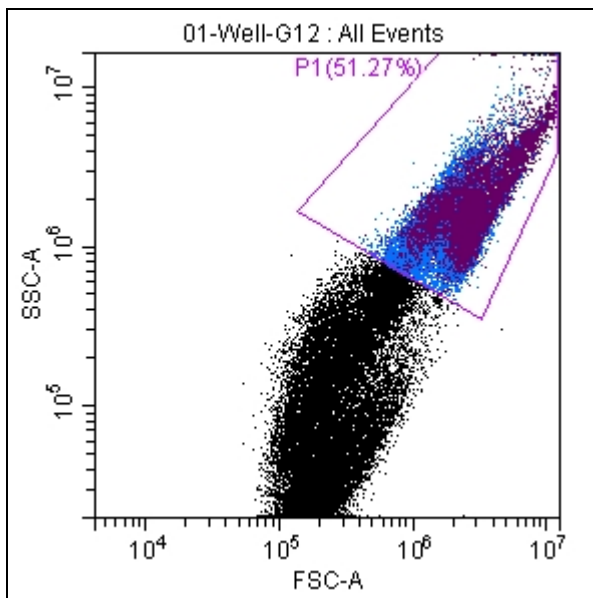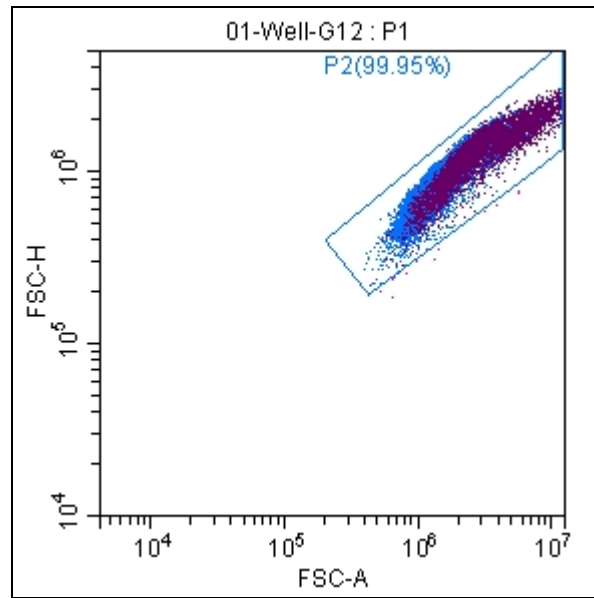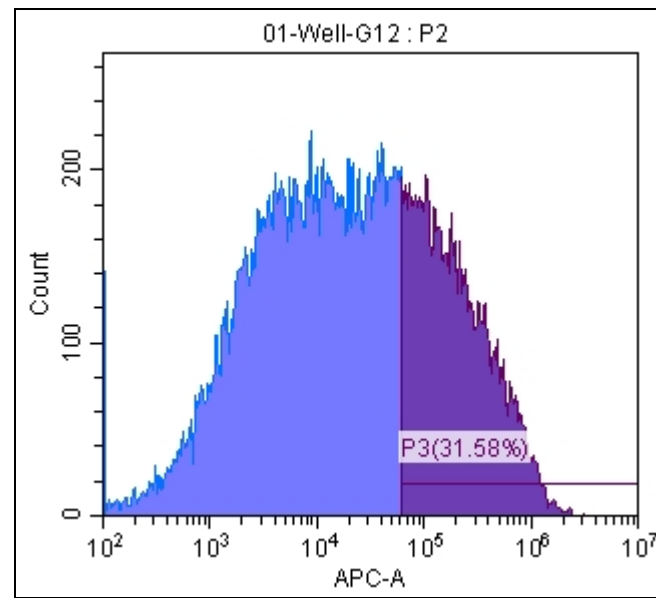

Tube Name: 01-Well-G12

Sample ID:

Record Time: 2023-03-06 12:59:35

| Population   | Events | % Total | % Parent | Mean APC-A | Median APC-A | rSD APC-A |
|--------------|--------|---------|----------|------------|--------------|-----------|
| ● All Events | 50000  | 100.00% | 100.00%  | 52963.6    | 4286.0       | 6446.9    |
| ● P3         | 8093   | 16.19%  | 31.58%   | 276058.7   | 171981.1     | 131923.7  |
| ● P2         | 25623  | 51.25%  | 99.95%   | 96889.0    | 19702.4      | 27158.1   |
| ● P1         | 25637  | 51.27%  | 51.27%   | 96892.6    | 19717.4      | 27178.3   |

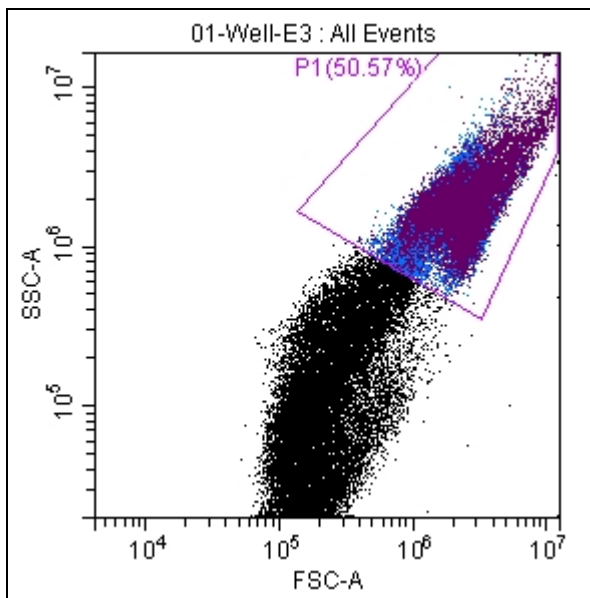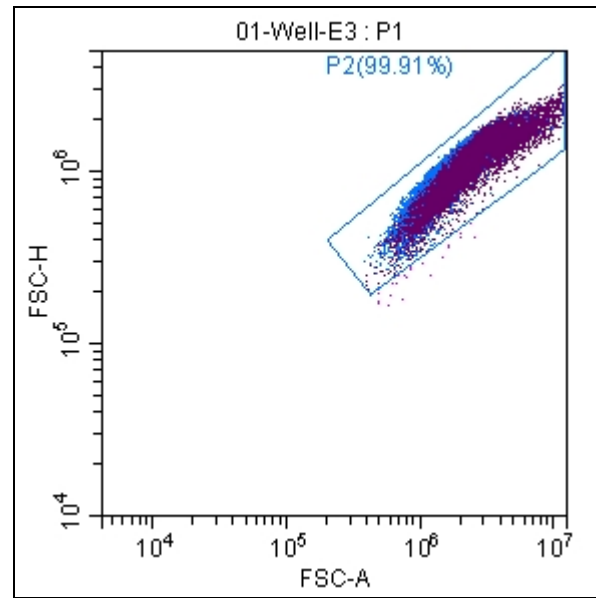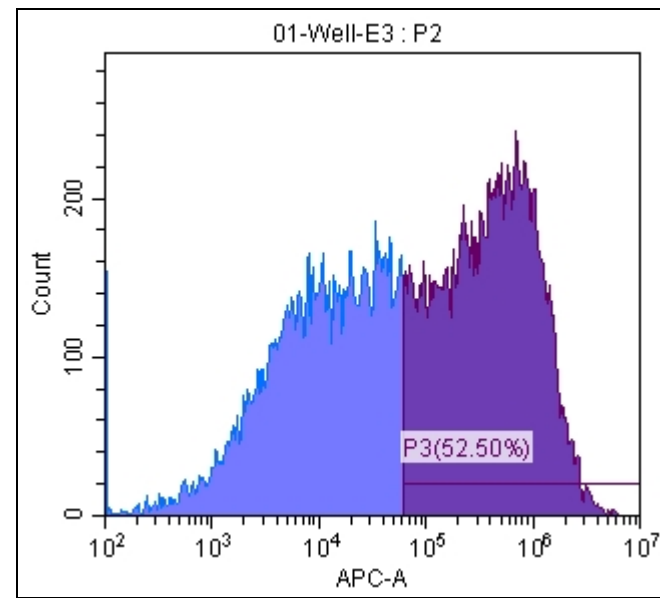

Tube Name: 01-Well-E3

Sample ID:

Record Time: 2023-03-06 12:38:10

| Population   | Events | % Total | % Parent | Mean APC-A | Median APC-A | rSD APC-A |
|--------------|--------|---------|----------|------------|--------------|-----------|
| ● All Events | 50000  | 100.00% | 100.00%  | 169552.7   | 10220.7      | 16136.9   |
| ● P3         | 13262  | 26.52%  | 52.50%   | 591210.9   | 398380.6     | 401426.6  |
| ● P2         | 25260  | 50.52%  | 99.91%   | 317910.5   | 72712.4      | 104709.2  |
| ● P1         | 25284  | 50.57%  | 50.57%   | 317726.8   | 72760.5      | 104768.7  |

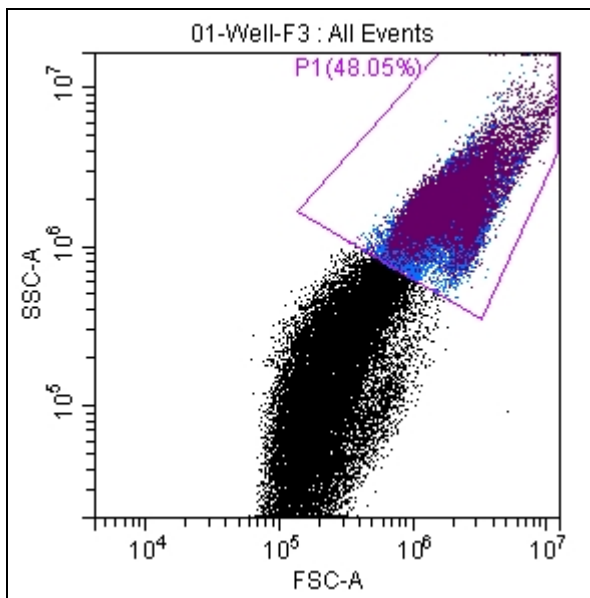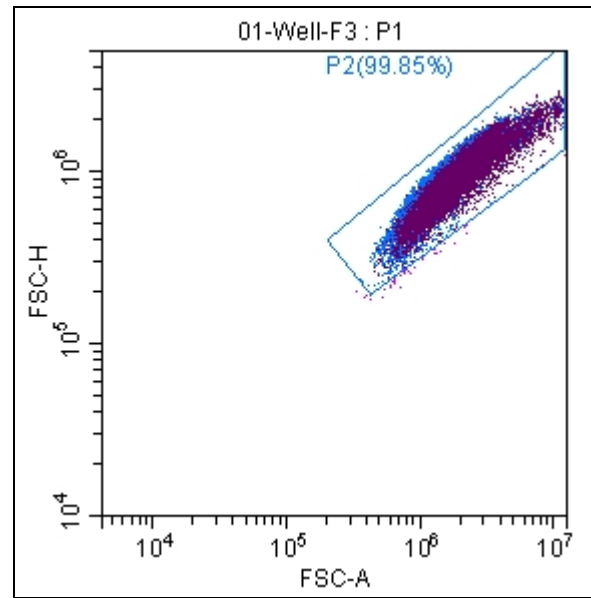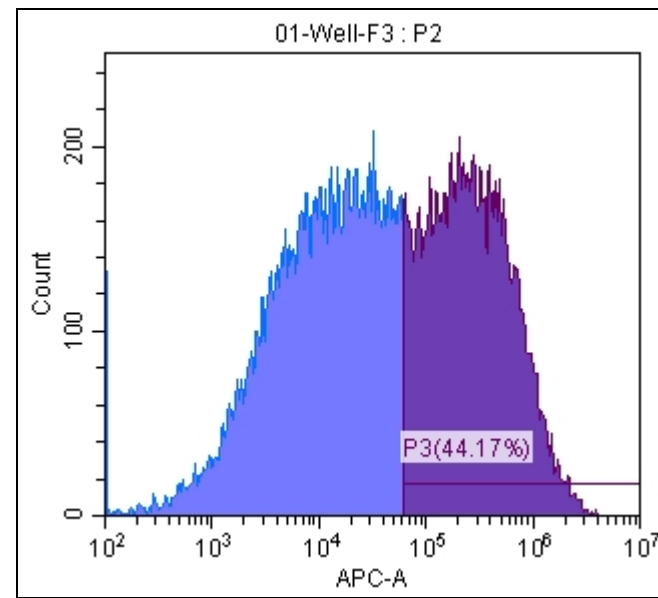

Tube Name: 01-Well-F3

Sample ID:

Record Time: 2023-03-06 12:45:55

| Population   | Events | % Total | % Parent | Mean APC-A | Median APC-A | rSD APC-A |
|--------------|--------|---------|----------|------------|--------------|-----------|
| ● All Events | 50000  | 100.00% | 100.00%  | 91207.6    | 5933.5       | 9565.7    |
| ● P3         | 10595  | 21.19%  | 44.17%   | 386017.9   | 248946.5     | 217956.6  |
| ● P2         | 23988  | 47.98%  | 99.85%   | 179509.3   | 41338.9      | 57420.2   |
| ● P1         | 24024  | 48.05%  | 48.05%   | 179414.5   | 41303.9      | 57365.1   |

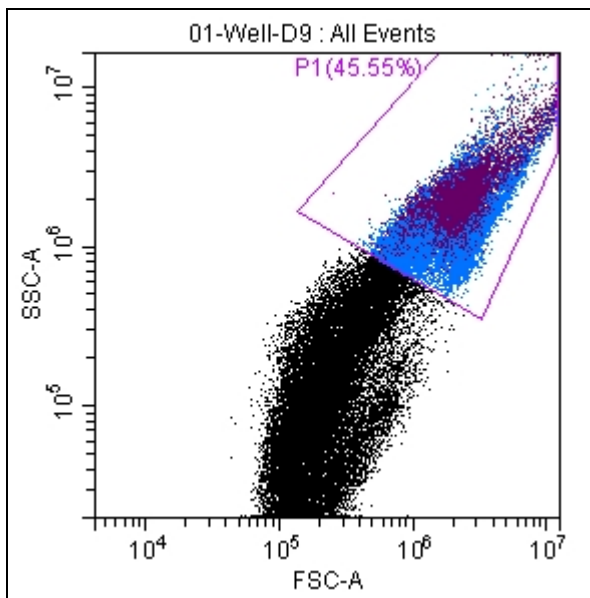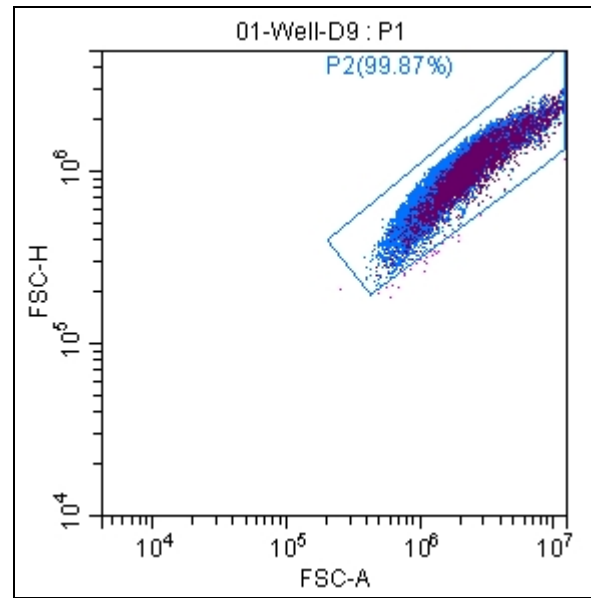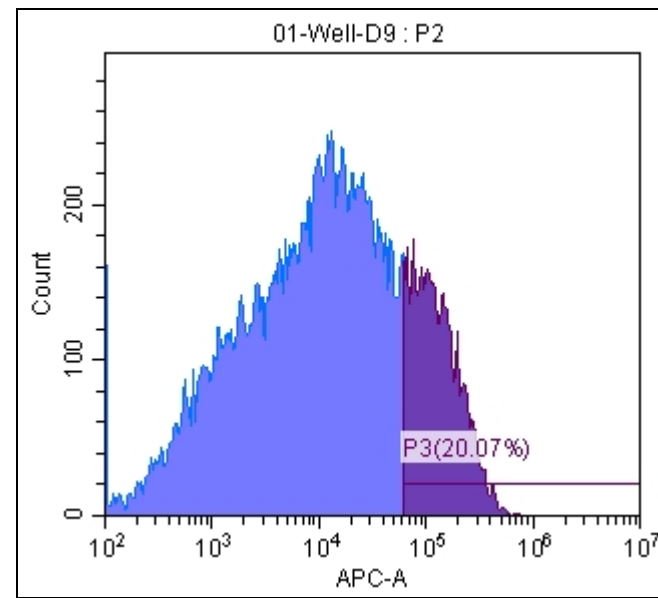

Tube Name: 01-Well-D9

Sample ID:

Record Time: 2023-03-06 12:34:13

| Population   | Events | % Total | % Parent | Mean APC-A | Median APC-A | rSD APC-A |
|--------------|--------|---------|----------|------------|--------------|-----------|
| ● All Events | 50000  | 100.00% | 100.00%  | 19379.4    | 1759.6       | 2717.0    |
| ● P3         | 4566   | 9.13%   | 20.07%   | 144152.8   | 117795.6     | 59594.9   |
| ● P2         | 22746  | 45.49%  | 99.87%   | 39593.6    | 12479.9      | 16685.1   |
| ● P1         | 22775  | 45.55%  | 45.55%   | 39584.1    | 12481.1      | 16684.4   |

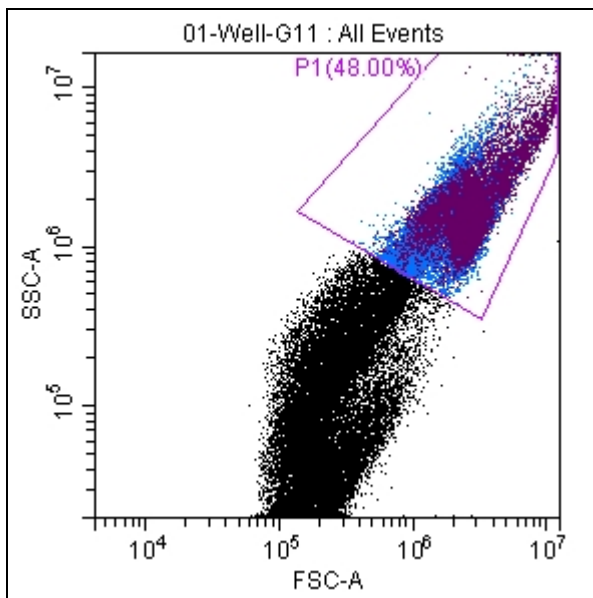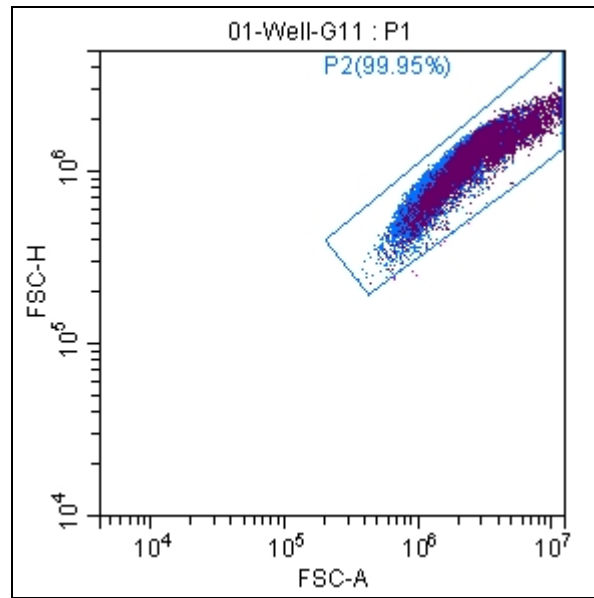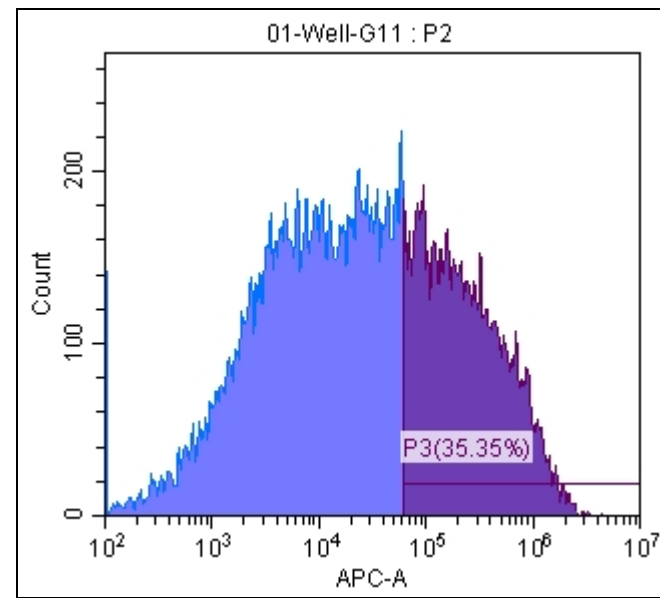

Tube Name: 01-Well-G11

Sample ID:

Record Time: 2023-03-06 12:58:56

| Population   | Events | % Total | % Parent | Mean APC-A | Median APC-A | rSD APC-A |
|--------------|--------|---------|----------|------------|--------------|-----------|
| ● All Events | 50000  | 100.00% | 100.00%  | 71516.1    | 4756.6       | 7227.7    |
| ● P3         | 8480   | 16.96%  | 35.35%   | 350293.8   | 206951.3     | 177341.3  |
| ● P2         | 23989  | 47.98%  | 99.95%   | 133328.9   | 24748.7      | 34358.2   |
| ● P1         | 24000  | 48.00%  | 48.00%   | 133586.1   | 24777.1      | 34388.9   |

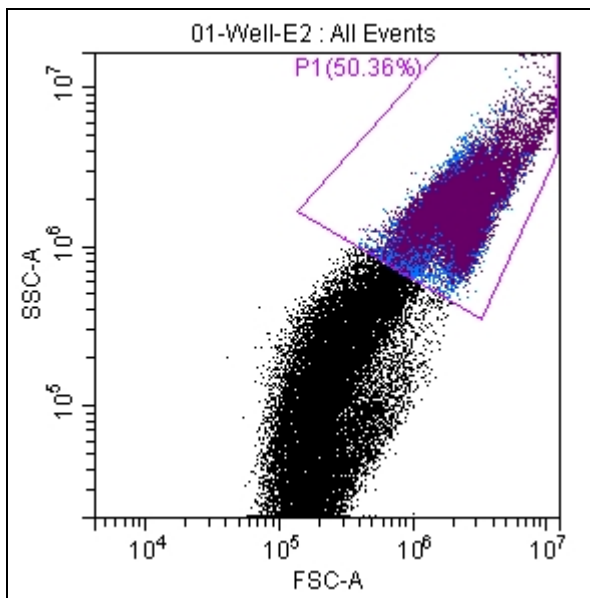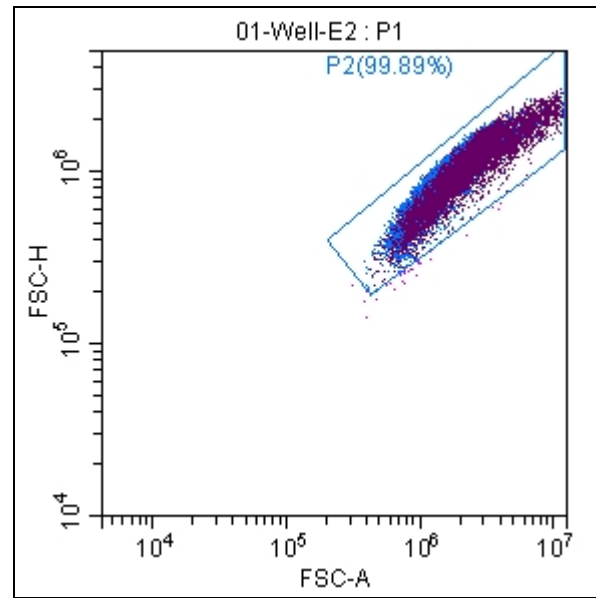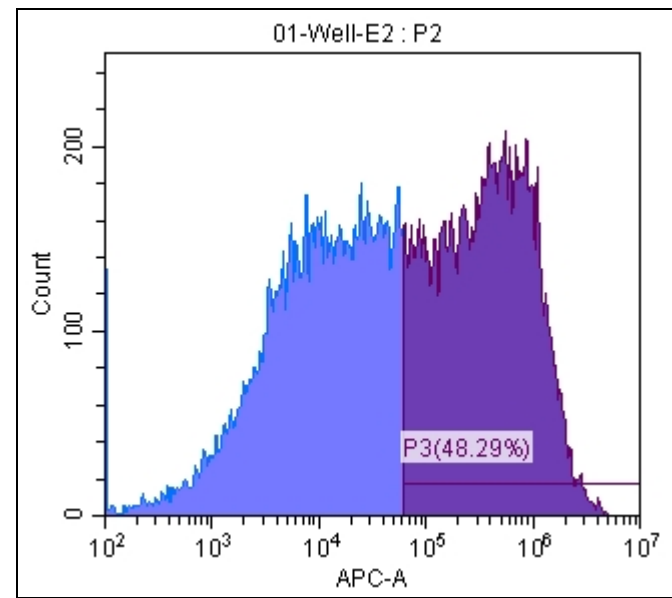

Tube Name: 01-Well-E2

Sample ID:

Record Time: 2023-03-06 12:37:31

| Population   | Events | % Total | % Parent | Mean APC-A | Median APC-A | rSD APC-A |
|--------------|--------|---------|----------|------------|--------------|-----------|
| ● All Events | 50000  | 100.00% | 100.00%  | 144130.8   | 8736.5       | 14118.7   |
| ● P3         | 12147  | 24.29%  | 48.29%   | 542593.8   | 360998.2     | 359222.1  |
| ● P2         | 25155  | 50.31%  | 99.89%   | 269847.4   | 53461.6      | 76874.6   |
| ● P1         | 25182  | 50.36%  | 50.36%   | 269685.8   | 53462.0      | 76871.2   |

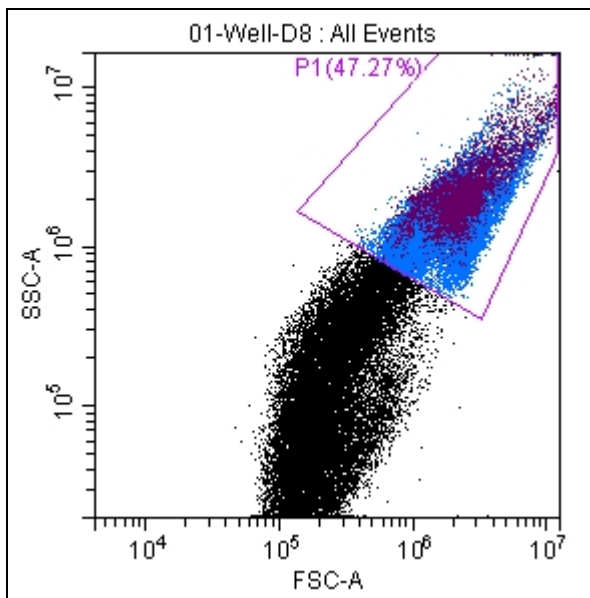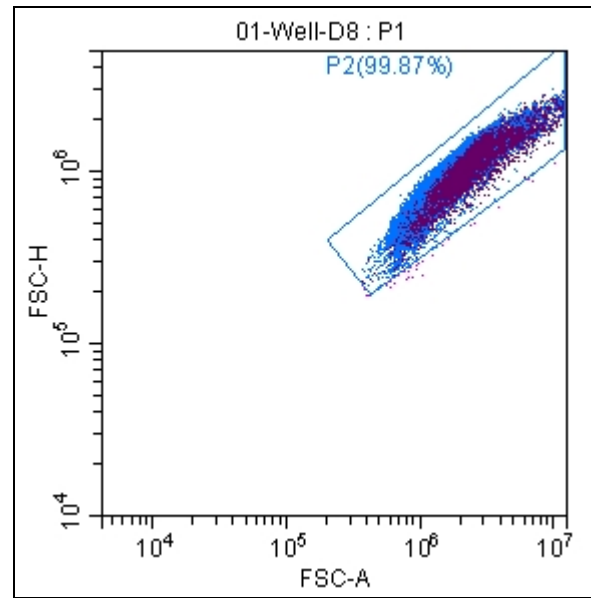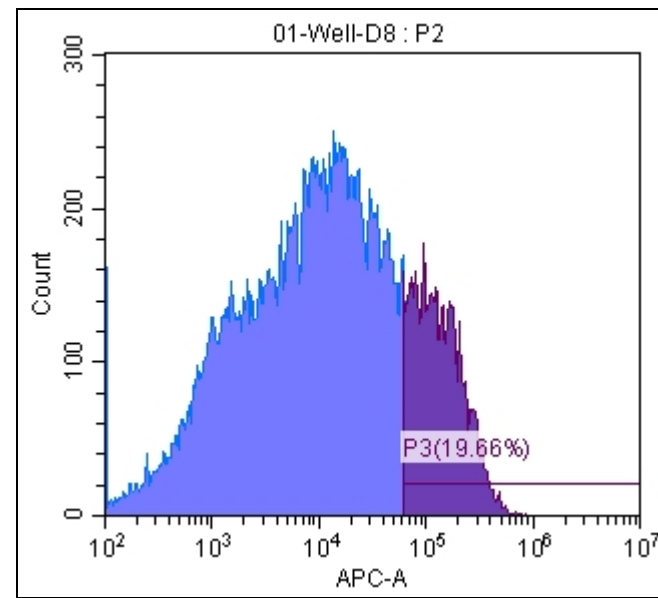

Tube Name: 01-Well-D8

Sample ID:

Record Time: 2023-03-06 12:33:34

| Population   | Events | % Total | % Parent | Mean APC-A | Median APC-A | rSD APC-A |
|--------------|--------|---------|----------|------------|--------------|-----------|
| ● All Events | 50000  | 100.00% | 100.00%  | 20456.8    | 1951.3       | 3063.7    |
| ● P3         | 4641   | 9.28%   | 19.66%   | 152659.9   | 124265.1     | 67050.0   |
| ● P2         | 23603  | 47.21%  | 99.87%   | 40433.8    | 11805.8      | 15757.8   |
| ● P1         | 23634  | 47.27%  | 47.27%   | 40439.3    | 11820.7      | 15778.9   |



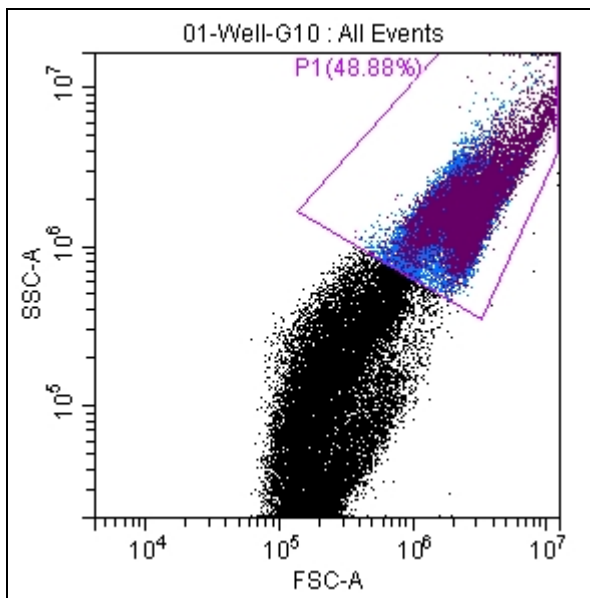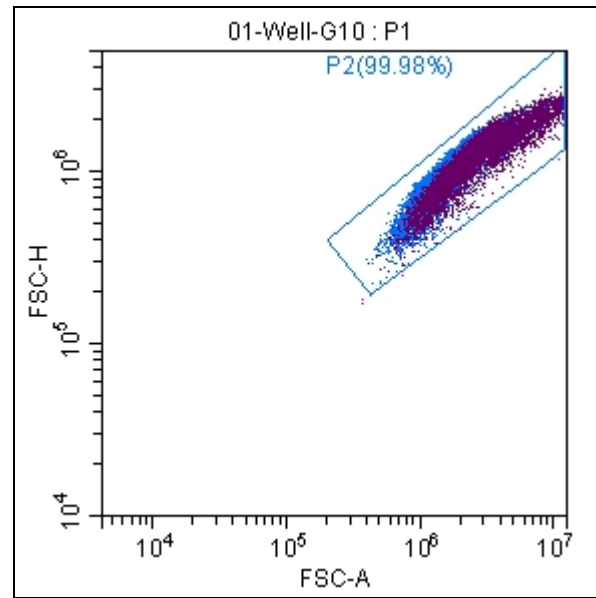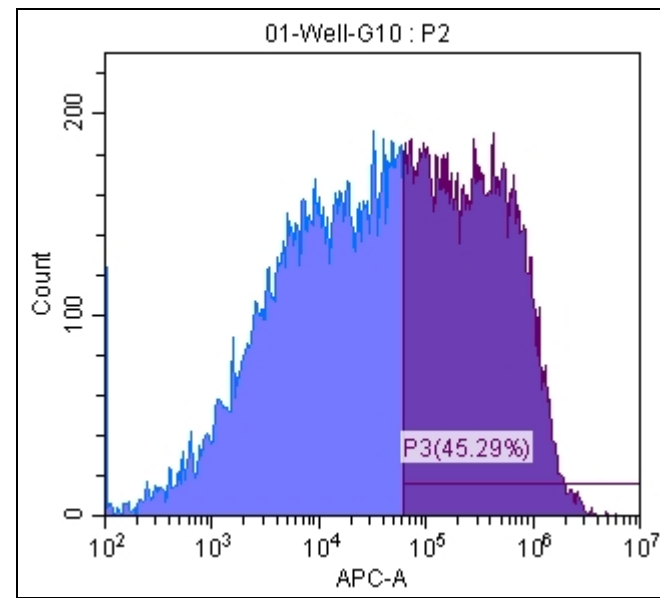

Tube Name: 01-Well-G10

Sample ID:

Record Time: 2023-03-06 12:58:18

| Population   | Events | % Total | % Parent | Mean APC-A | Median APC-A | rSD APC-A |
|--------------|--------|---------|----------|------------|--------------|-----------|
| ● All Events | 50000  | 100.00% | 100.00%  | 102097.1   | 7105.6       | 11004.0   |
| ● P3         | 11065  | 22.13%  | 45.29%   | 408315.3   | 263603.0     | 248762.5  |
| ● P2         | 24433  | 48.87%  | 99.98%   | 193420.2   | 44910.5      | 63515.2   |
| ● P1         | 24439  | 48.88%  | 48.88%   | 193485.3   | 44933.2      | 63546.0   |

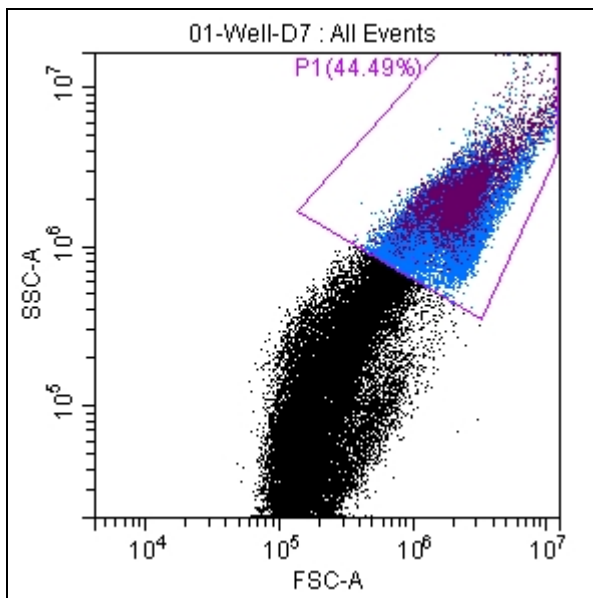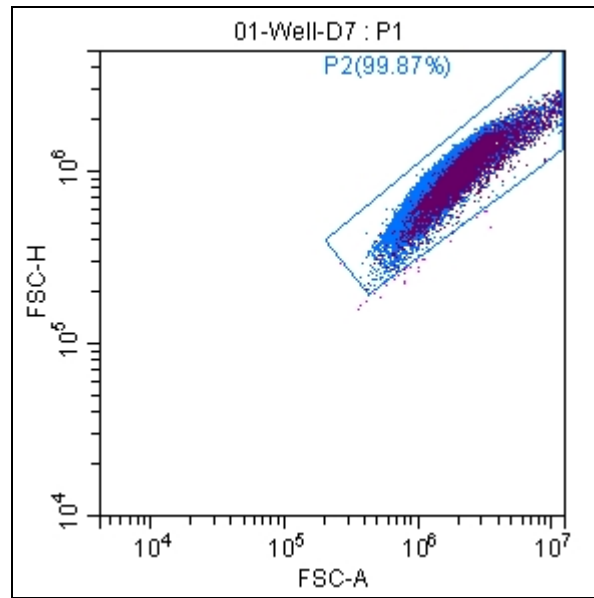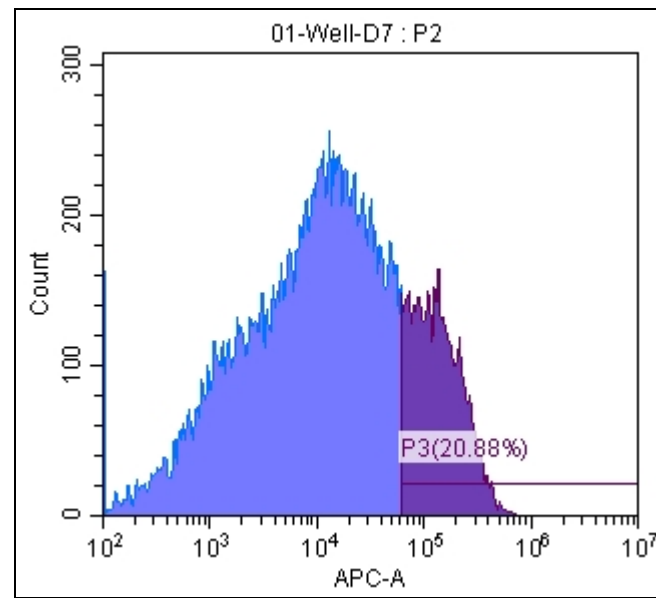

Tube Name: 01-Well-D7

Sample ID:

Record Time: 2023-03-06 12:32:54

| Population   | Events | % Total | % Parent | Mean APC-A | Median APC-A | rSD APC-A |
|--------------|--------|---------|----------|------------|--------------|-----------|
| ● All Events | 50000  | 100.00% | 100.00%  | 20458.9    | 1882.1       | 2929.9    |
| ● P3         | 4640   | 9.28%   | 20.88%   | 153573.7   | 127163.8     | 69074.0   |
| ● P2         | 22218  | 44.44%  | 99.87%   | 43020.9    | 13519.6      | 17852.4   |
| ● P1         | 22247  | 44.49%  | 44.49%   | 43007.3    | 13527.8      | 17861.0   |

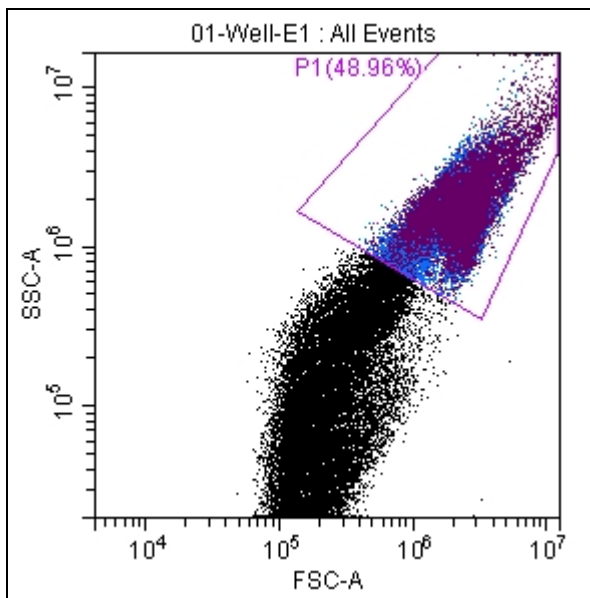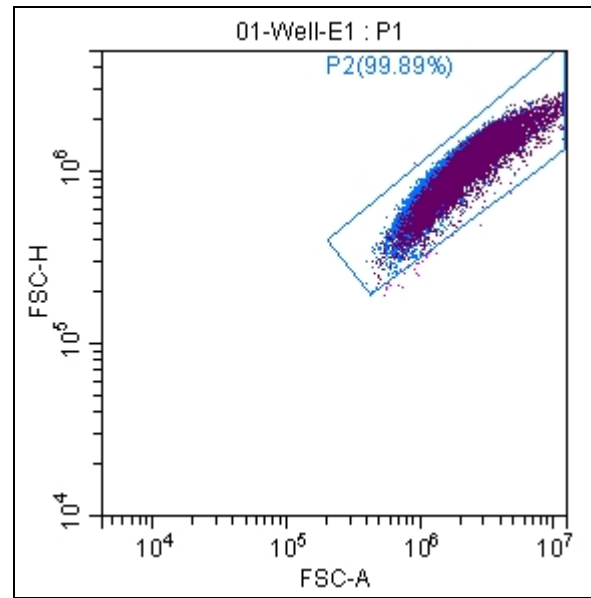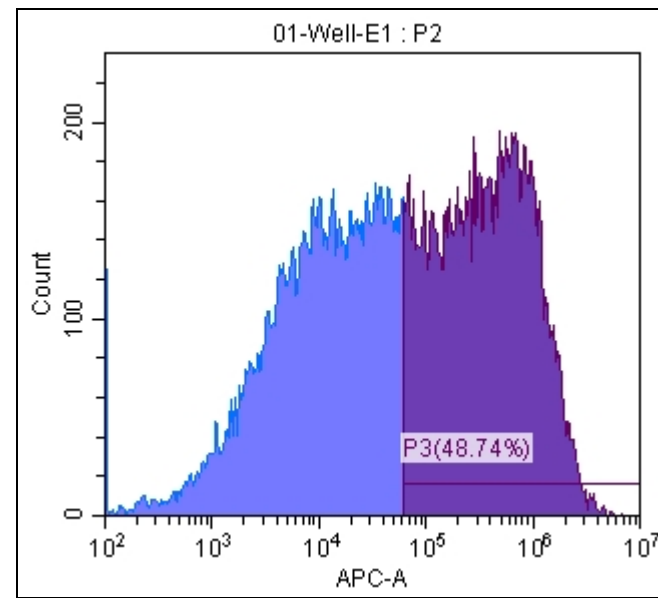

Tube Name: 01-Well-E1

Sample ID:

Record Time: 2023-03-06 12:36:51

| Population   | Events | % Total | % Parent | Mean APC-A | Median APC-A | rSD APC-A |
|--------------|--------|---------|----------|------------|--------------|-----------|
| ● All Events | 50000  | 100.00% | 100.00%  | 145187.4   | 8336.6       | 13687.3   |
| ● P3         | 11917  | 23.83%  | 48.74%   | 552799.8   | 355140.6     | 361414.6  |
| ● P2         | 24452  | 48.90%  | 99.89%   | 277760.0   | 55243.1      | 79323.4   |
| ● P1         | 24480  | 48.96%  | 48.96%   | 277843.0   | 55152.5      | 79188.4   |

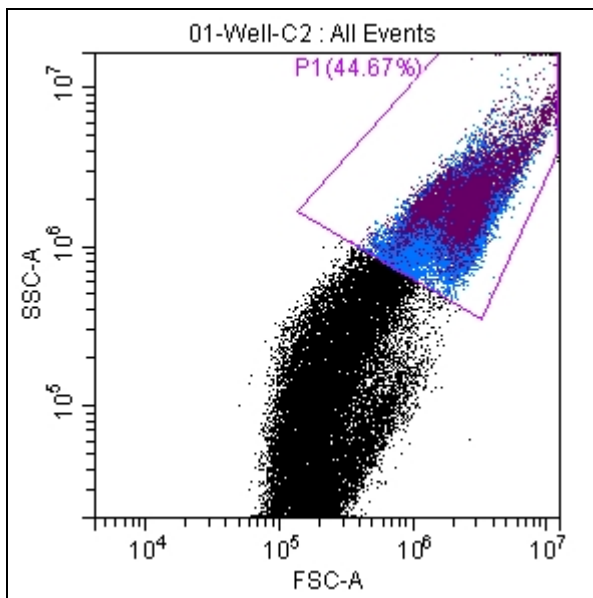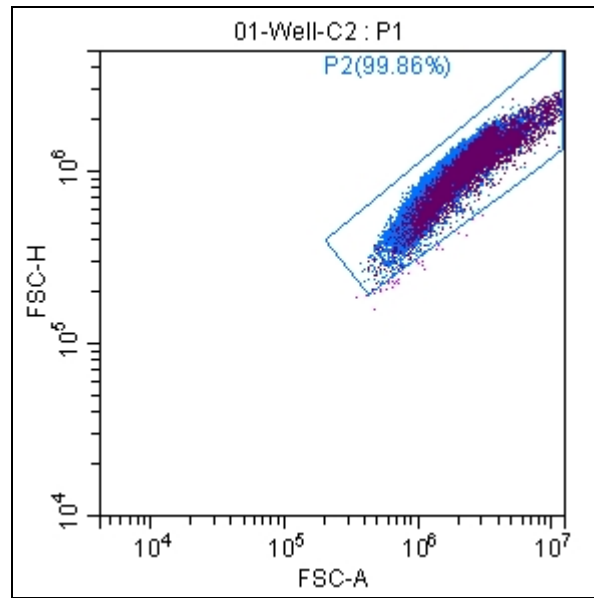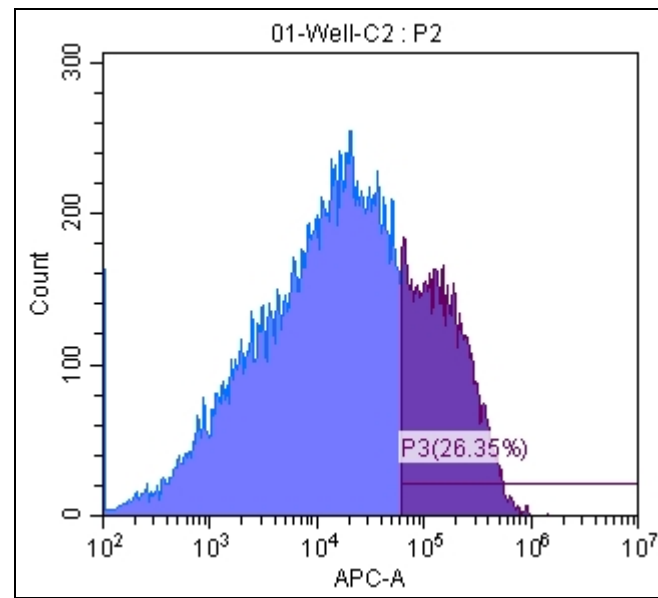

Tube Name: 01-Well-C2

Sample ID:

Record Time: 2023-03-06 12:21:55

| Population   | Events | % Total | % Parent | Mean APC-A | Median APC-A | rSD APC-A |
|--------------|--------|---------|----------|------------|--------------|-----------|
| ● All Events | 50000  | 100.00% | 100.00%  | 27830.0    | 2624.8       | 4053.1    |
| ● P3         | 5878   | 11.76%  | 26.35%   | 180310.8   | 140728.9     | 87161.6   |
| ● P2         | 22306  | 44.61%  | 99.86%   | 58861.0    | 18687.8      | 24740.9   |
| ● P1         | 22337  | 44.67%  | 44.67%   | 58829.5    | 18676.6      | 24723.4   |

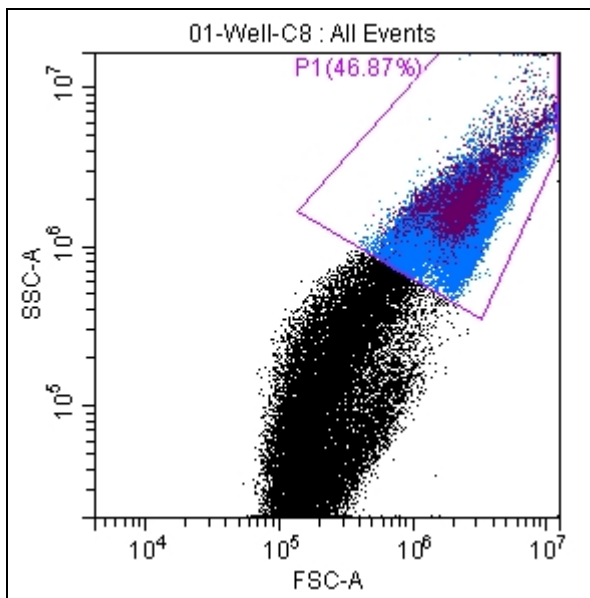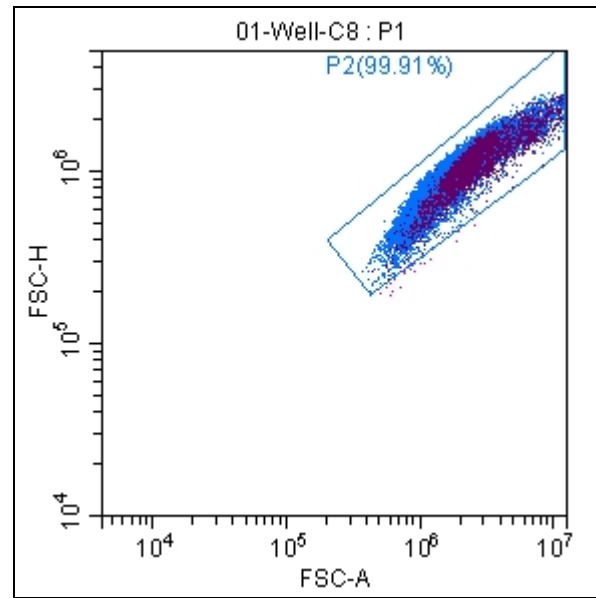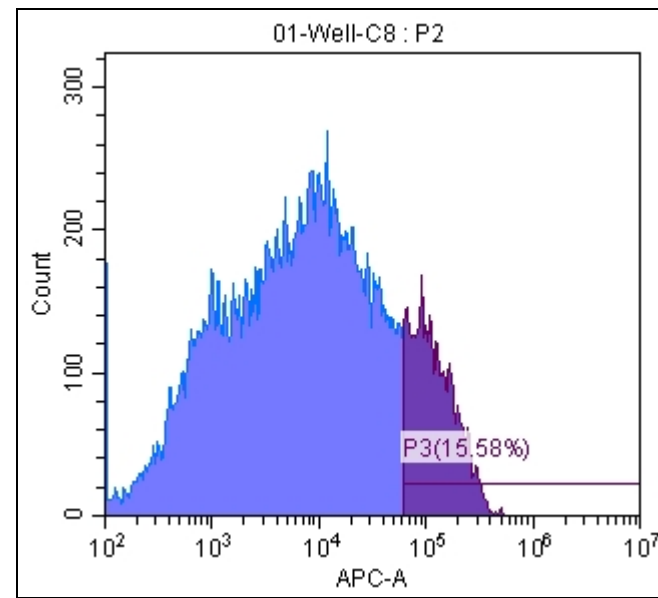

Tube Name: 01-Well-C8

Sample ID:

Record Time: 2023-03-06 12:25:45

| Population   | Events | % Total | % Parent | Mean APC-A | Median APC-A | rSD APC-A |
|--------------|--------|---------|----------|------------|--------------|-----------|
| ● All Events | 50000  | 100.00% | 100.00%  | 14993.8    | 1288.1       | 2019.2    |
| ● P3         | 3648   | 7.30%   | 15.58%   | 133187.0   | 110559.0     | 52854.5   |
| ● P2         | 23413  | 46.83%  | 99.91%   | 30130.6    | 8150.5       | 10846.4   |
| ● P1         | 23435  | 46.87%  | 46.87%   | 30122.4    | 8152.2       | 10847.7   |

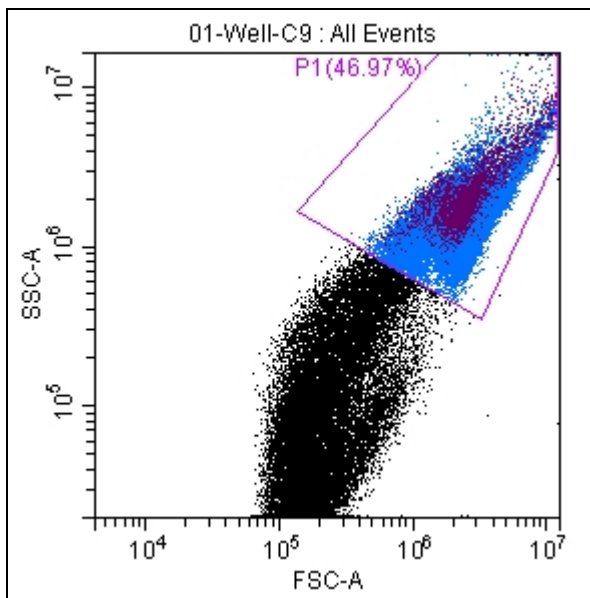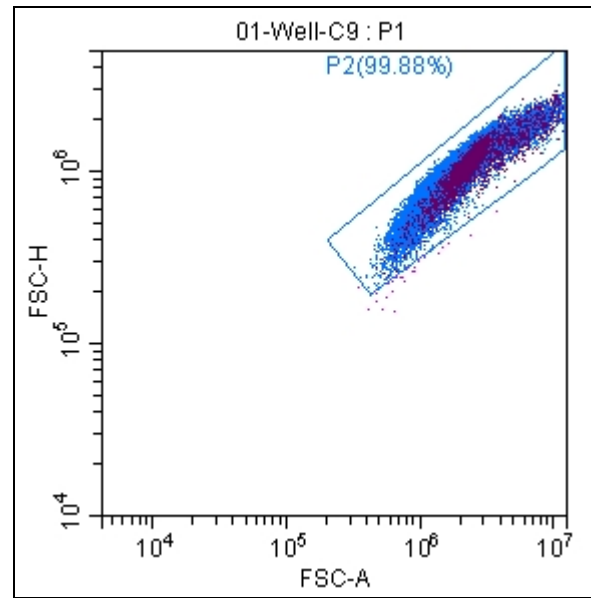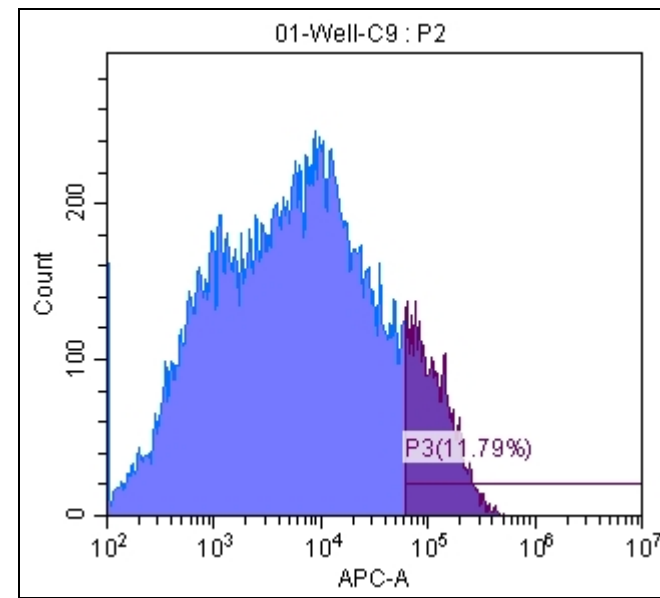

Tube Name: 01-Well-C9

Sample ID:

Record Time: 2023-03-06 12:26:26

| Population   | Events | % Total | % Parent | Mean APC-A | Median APC-A | rSD APC-A |
|--------------|--------|---------|----------|------------|--------------|-----------|
| ● All Events | 50000  | 100.00% | 100.00%  | 11786.3    | 1032.8       | 1634.1    |
| ● P3         | 2765   | 5.53%   | 11.79%   | 125083.3   | 105472.5     | 47579.9   |
| ● P2         | 23454  | 46.91%  | 99.88%   | 23400.9    | 5925.4       | 7853.8    |
| ● P1         | 23483  | 46.97%  | 46.97%   | 23385.6    | 5928.2       | 7857.2    |

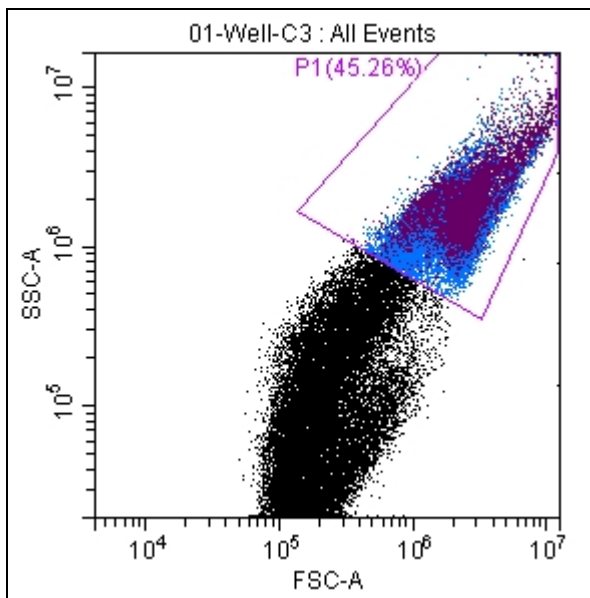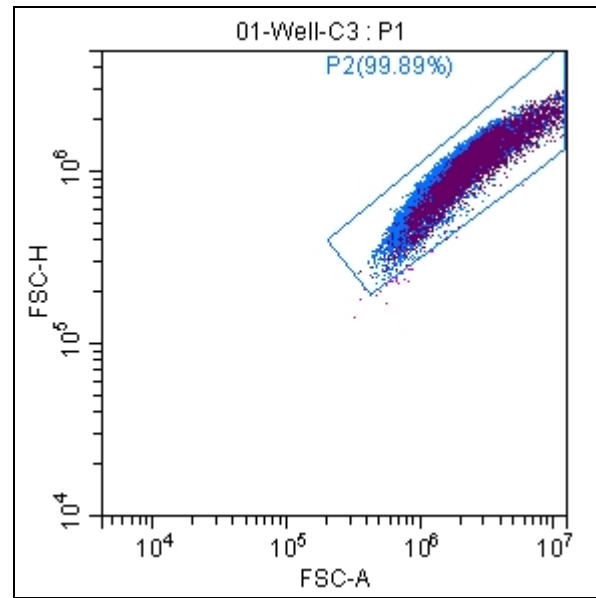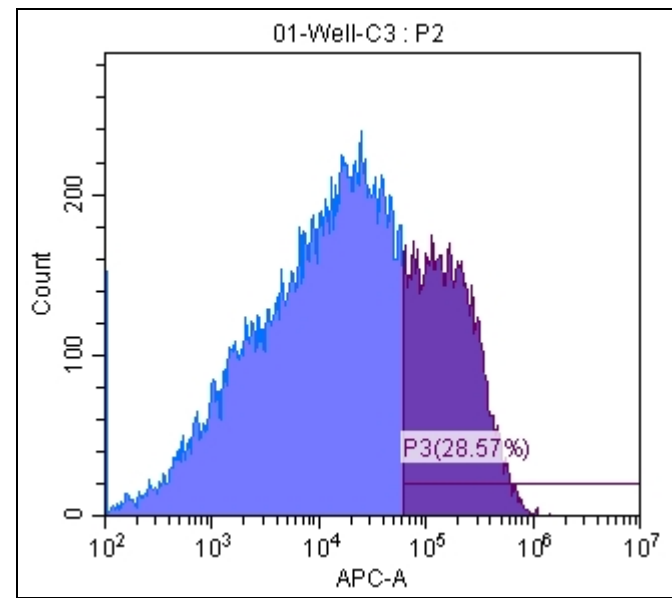

Tube Name: 01-Well-C3

Sample ID:

Record Time: 2023-03-06 12:22:34

| Population   | Events | % Total | % Parent | Mean APC-A | Median APC-A | rSD APC-A |
|--------------|--------|---------|----------|------------|--------------|-----------|
| ● All Events | 50000  | 100.00% | 100.00%  | 31768.3    | 2592.3       | 4028.8    |
| ● P3         | 6459   | 12.92%  | 28.57%   | 194140.7   | 154133.8     | 99808.5   |
| ● P2         | 22606  | 45.21%  | 99.89%   | 66379.6    | 20000.4      | 26948.3   |
| ● P1         | 22630  | 45.26%  | 45.26%   | 66362.5    | 20003.6      | 26953.1   |

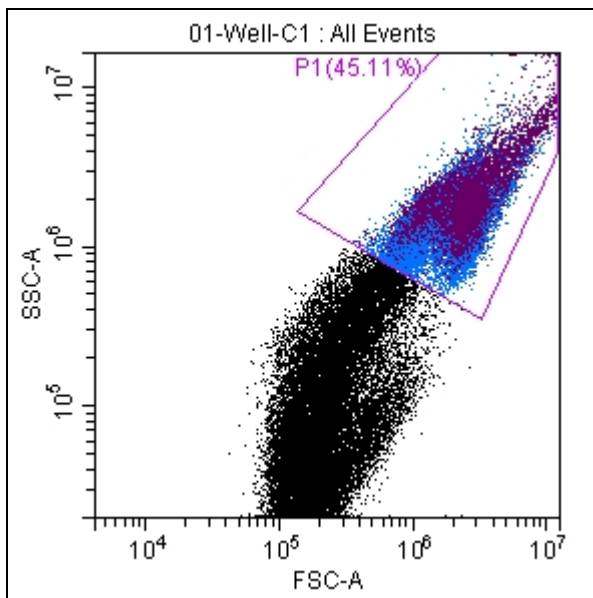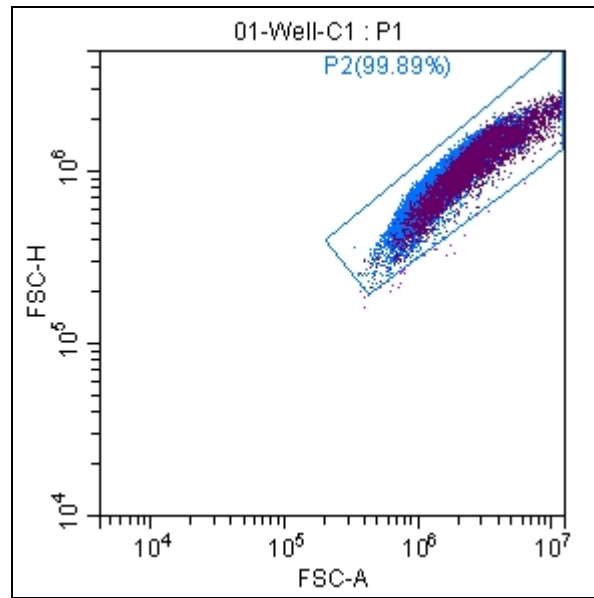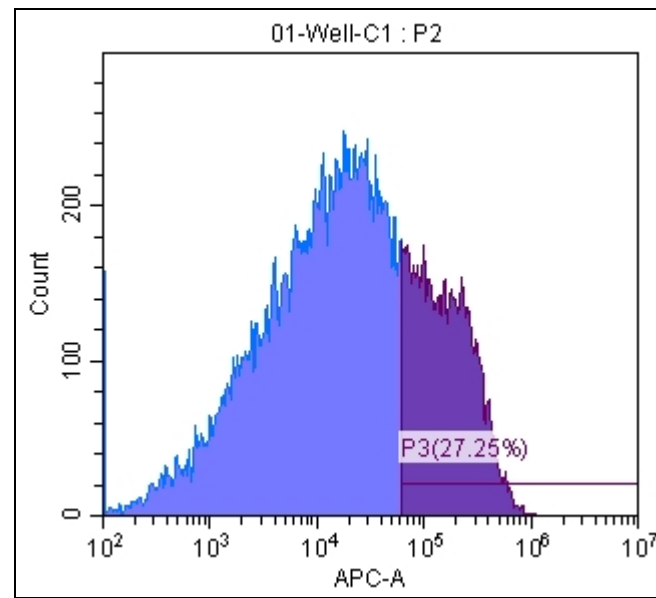

Tube Name: 01-Well-C1

Sample ID:

Record Time: 2023-03-06 12:21:18

| Population   | Events | % Total | % Parent | Mean APC-A | Median APC-A | rSD APC-A |
|--------------|--------|---------|----------|------------|--------------|-----------|
| ● All Events | 50000  | 100.00% | 100.00%  | 29691.5    | 2738.6       | 4235.5    |
| ● P3         | 6140   | 12.28%  | 27.25%   | 187439.5   | 147790.2     | 97412.1   |
| ● P2         | 22532  | 45.06%  | 99.89%   | 62500.9    | 19628.9      | 25642.0   |
| ● P1         | 22556  | 45.11%  | 45.11%   | 62464.5    | 19623.1      | 25629.9   |



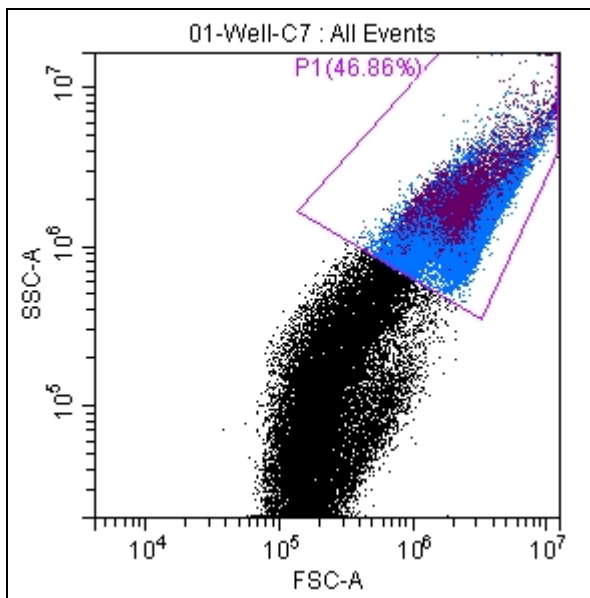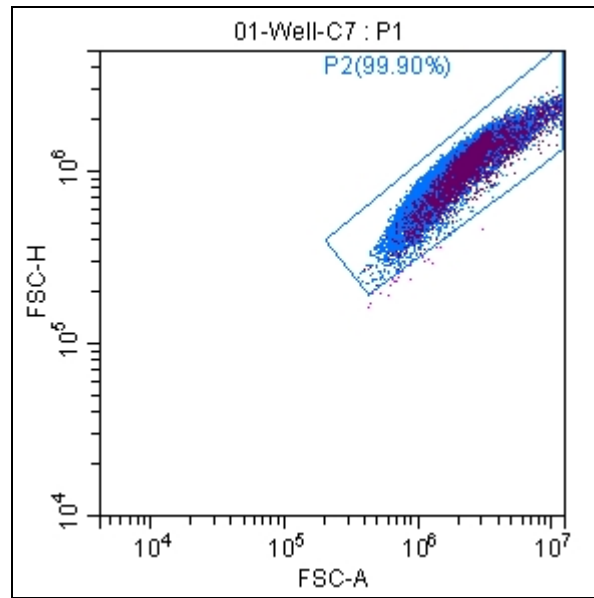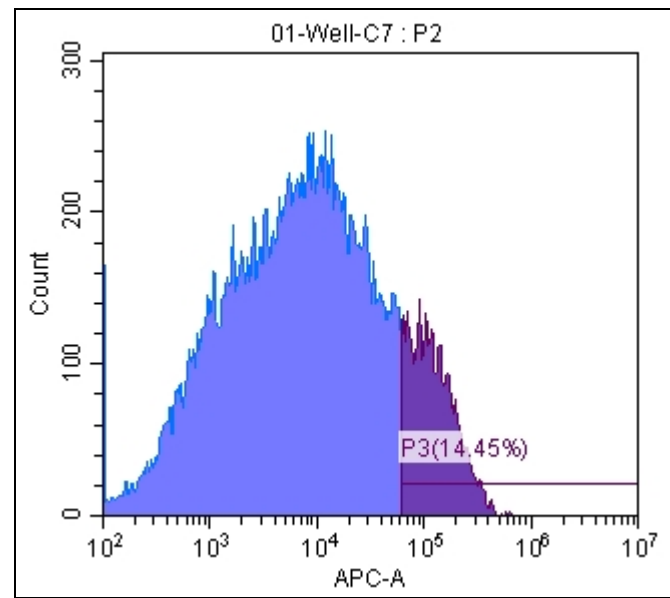

Tube Name: 01-Well-C7

Sample ID:

Record Time: 2023-03-06 12:25:07

| Population   | Events | % Total | % Parent | Mean APC-A | Median APC-A | rSD APC-A |
|--------------|--------|---------|----------|------------|--------------|-----------|
| ● All Events | 50000  | 100.00% | 100.00%  | 14856.4    | 1496.8       | 2309.8    |
| ● P3         | 3383   | 6.77%   | 14.45%   | 137124.8   | 113985.6     | 55769.2   |
| ● P2         | 23406  | 46.81%  | 99.90%   | 29430.5    | 8046.4       | 10536.0   |
| ● P1         | 23430  | 46.86%  | 46.86%   | 29431.9    | 8058.0       | 10550.9   |

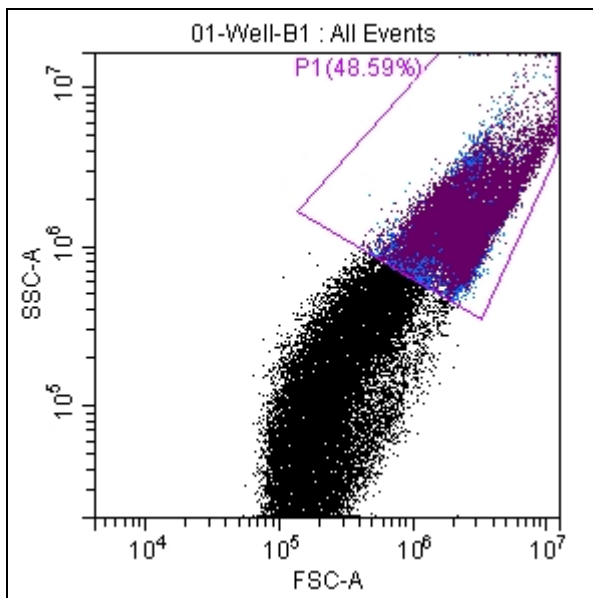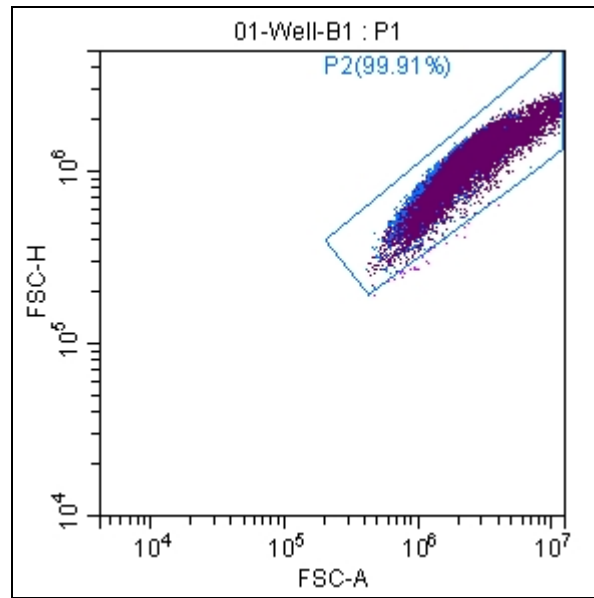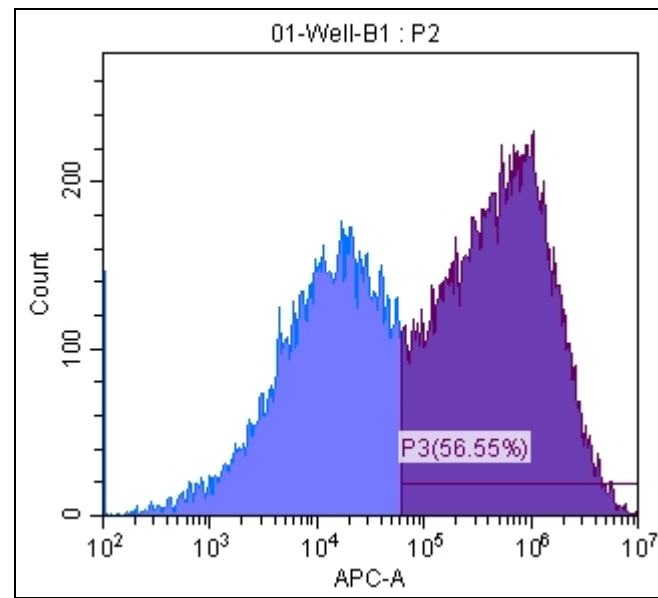

Tube Name: 01-Well-B1

Sample ID:

Record Time: 2022-11-03 13:03:20

| Population   | Events | % Total | % Parent | Mean APC-A | Median APC-A | rCV APC-A | rSD APC-A | CV APC-A | SD APC-A |
|--------------|--------|---------|----------|------------|--------------|-----------|-----------|----------|----------|
| ● All Events | 50000  | 100.00% | 100.00%  | 240560.8   | 12389.6      | 156.72%   | 19416.6   | 260.26%  | 626080.7 |
| ● P3         | 13725  | 27.45%  | 56.55%   | 823515.6   | 513482.6     | 103.34%   | 530632.4  | 115.51%  | 951266.3 |
| ● P2         | 24270  | 48.54%  | 99.91%   | 472758.1   | 115334.1     | 144.15%   | 166252.3  | 173.39%  | 819732.2 |
| ● P1         | 24293  | 48.59%  | 48.59%   | 472652.1   | 115491.6     | 144.15%   | 166483.7  | 173.38%  | 819479.4 |

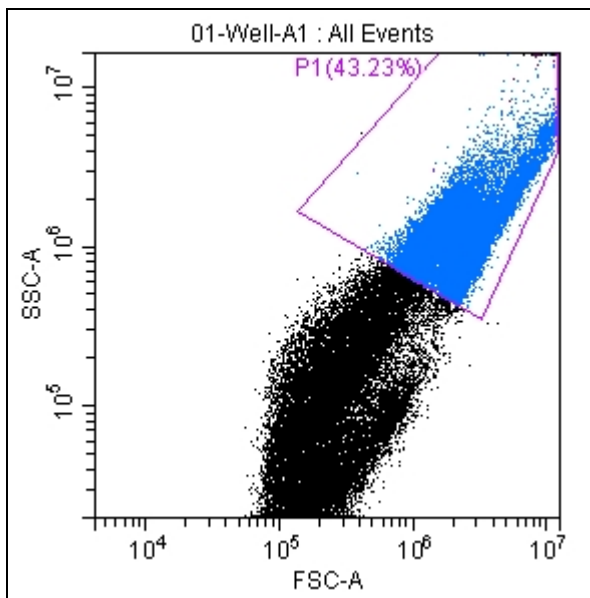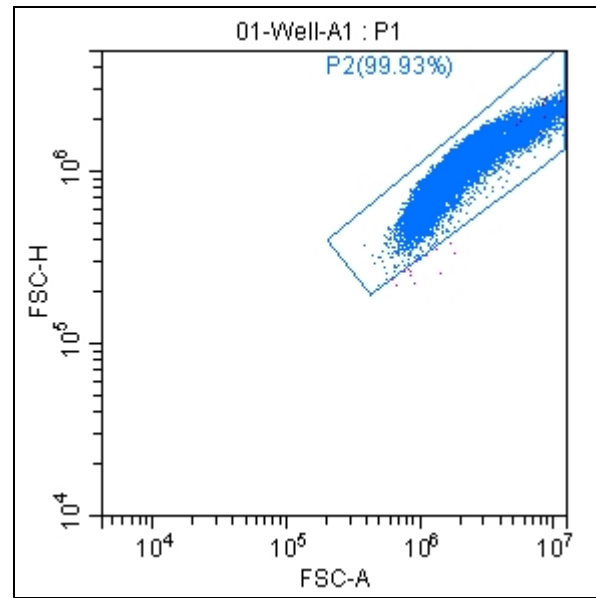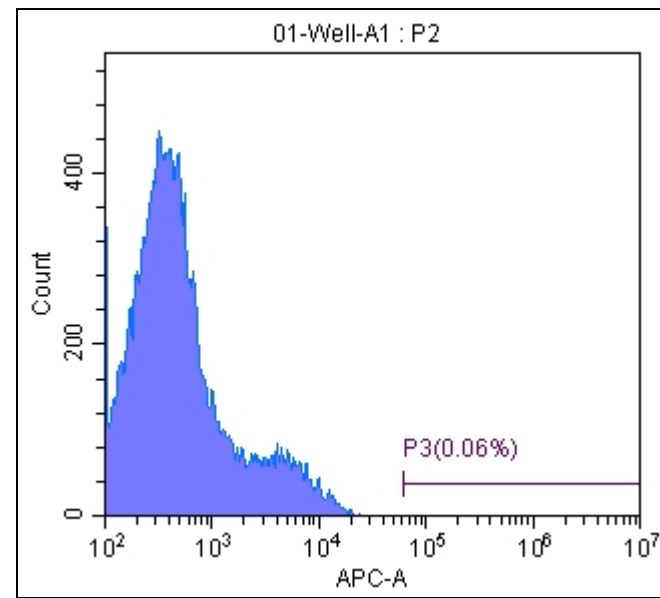

Tube Name: 01-Well-A1

Sample ID:

Record Time: 2022-11-03 13:02:38

| Population   | Events | % Total | % Parent | Mean APC-A | Median APC-A | rCV APC-A | rSD APC-A | CV APC-A | SD APC-A |
|--------------|--------|---------|----------|------------|--------------|-----------|-----------|----------|----------|
| ● All Events | 50000  | 100.00% | 100.00%  | 579.5      | 171.6        | 154.83%   | 265.7     | 436.77%  | 2531.2   |
| ● P3         | 12     | 0.02%   | 0.06%    | 93591.8    | 82808.4      | 17.42%    | 14429.2   | 44.59%   | 41728.3  |
| ● P2         | 21601  | 43.20%  | 99.93%   | 1080.0     | 353.7        | 91.76%    | 324.5     | 307.76%  | 3323.8   |
| ● P1         | 21617  | 43.23%  | 43.23%   | 1080.5     | 353.8        | 91.77%    | 324.7     | 307.59%  | 3323.5   |

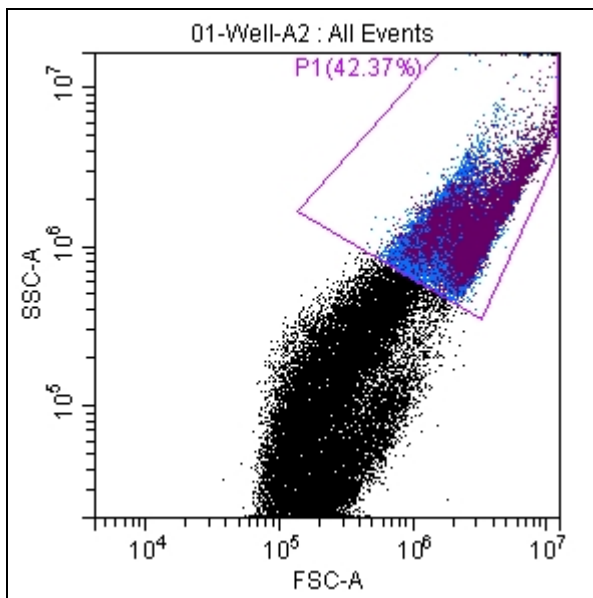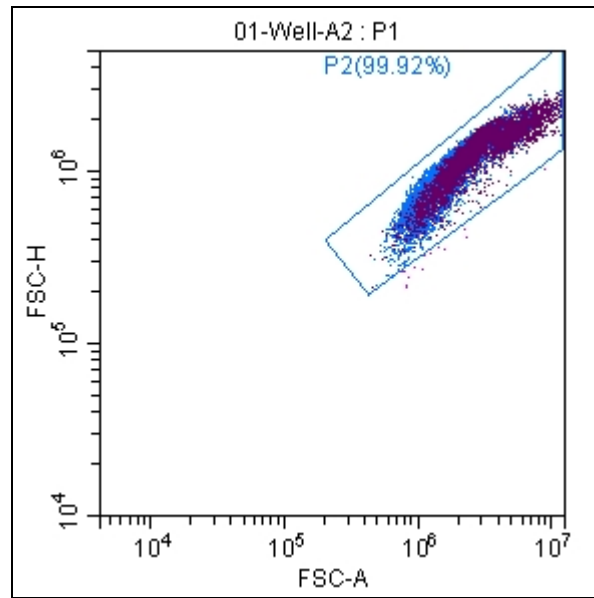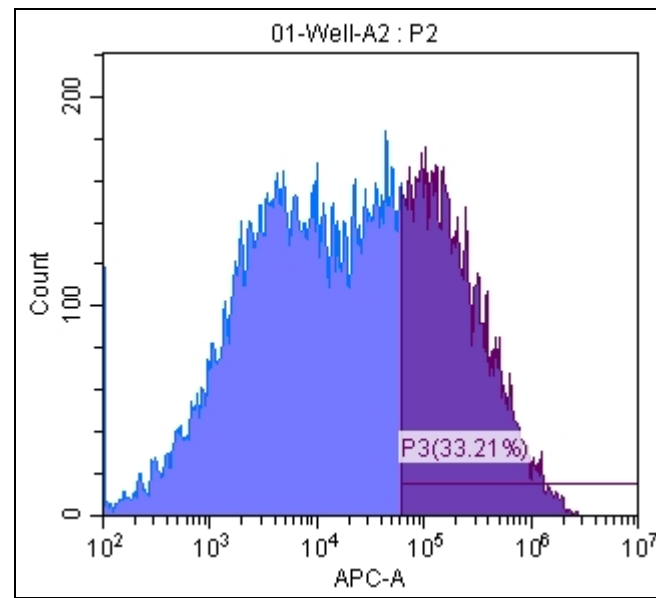

Tube Name: 01-Well-A2

Sample ID:

Record Time: 2022-11-03 13:08:18

| Population   | Events | % Total | % Parent | Mean APC-A | Median APC-A | rCV APC-A | rSD APC-A | CV APC-A | SD APC-A |
|--------------|--------|---------|----------|------------|--------------|-----------|-----------|----------|----------|
| ● All Events | 50000  | 100.00% | 100.00%  | 45744.1    | 3001.2       | 151.97%   | 4561.1    | 325.95%  | 149101.2 |
| ● P3         | 7030   | 14.06%  | 33.21%   | 275669.2   | 166292.1     | 73.09%    | 121547.2  | 110.53%  | 304699.8 |
| ● P2         | 21170  | 42.34%  | 99.92%   | 100536.9   | 20420.6      | 140.22%   | 28633.5   | 213.88%  | 215031.5 |
| ● P1         | 21187  | 42.37%  | 42.37%   | 100606.5   | 20452.6      | 140.23%   | 28680.0   | 213.97%  | 215272.4 |

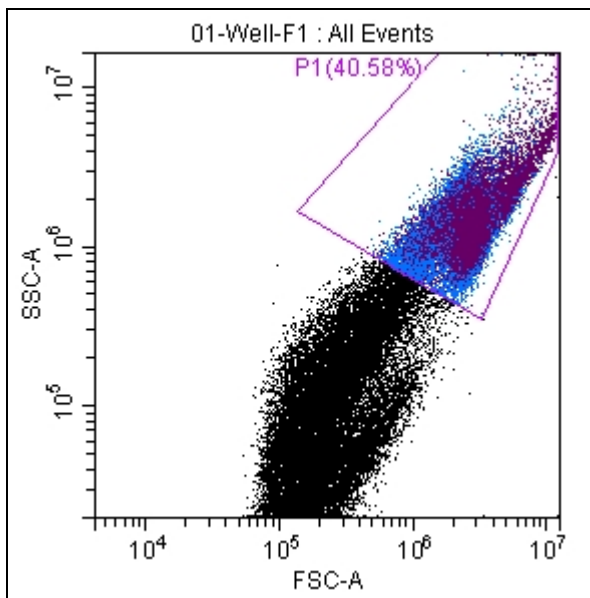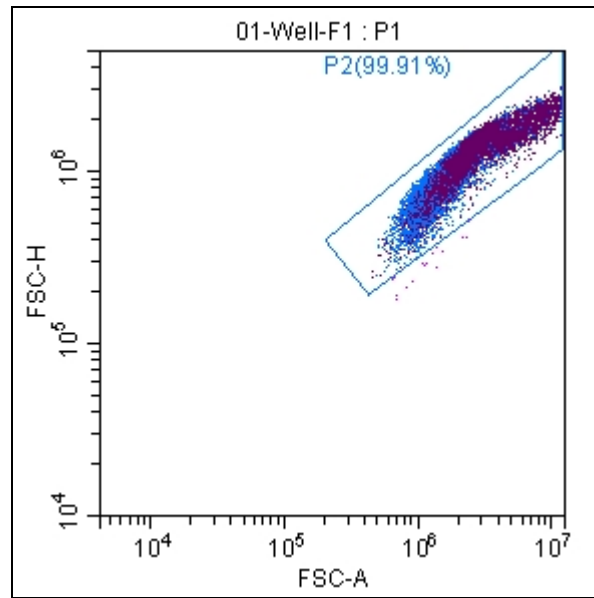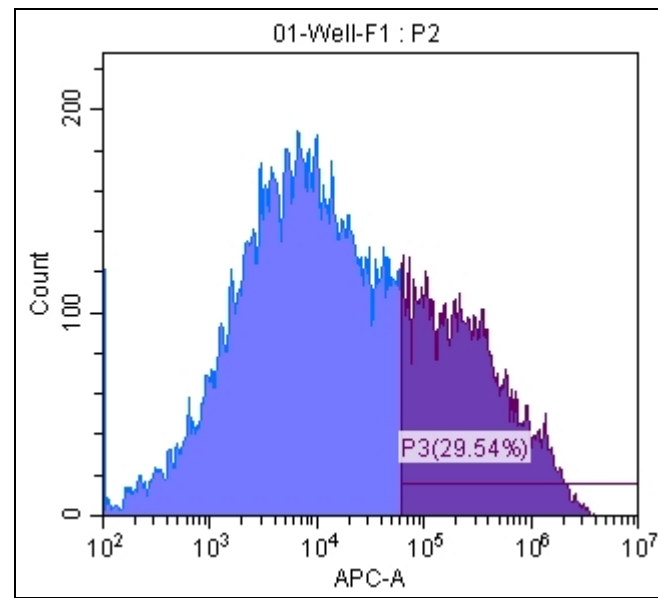

Tube Name: 01-Well-F1

Sample ID:

Record Time: 2022-11-03 13:06:11

| Population   | Events | % Total | % Parent | Mean APC-A | Median APC-A | rCV APC-A | rSD APC-A | CV APC-A | SD APC-A |
|--------------|--------|---------|----------|------------|--------------|-----------|-----------|----------|----------|
| ● All Events | 50000  | 100.00% | 100.00%  | 57417.8    | 3006.3       | 152.72%   | 4591.2    | 385.99%  | 221625.6 |
| ● P3         | 5988   | 11.98%  | 29.54%   | 408475.1   | 224483.5     | 88.33%    | 198289.8  | 119.11%  | 486547.8 |
| ● P2         | 20270  | 40.54%  | 99.91%   | 129168.3   | 13784.8      | 136.30%   | 18788.5   | 248.19%  | 320585.4 |
| ● P1         | 20289  | 40.58%  | 40.58%   | 129342.3   | 13790.7      | 136.33%   | 18801.3   | 248.48%  | 321394.8 |

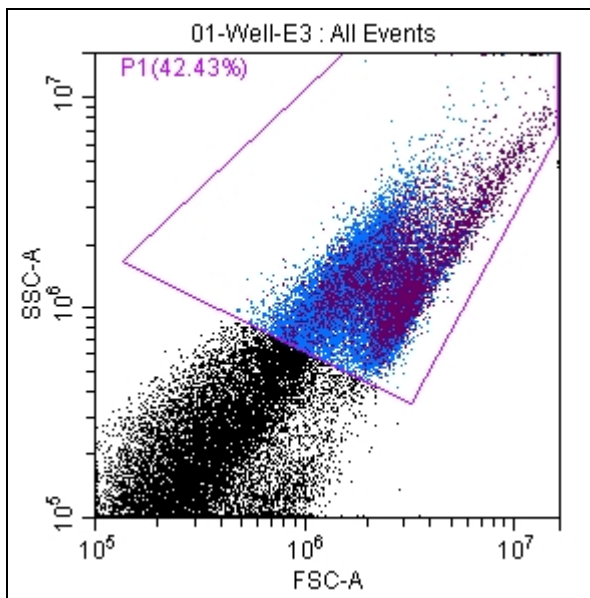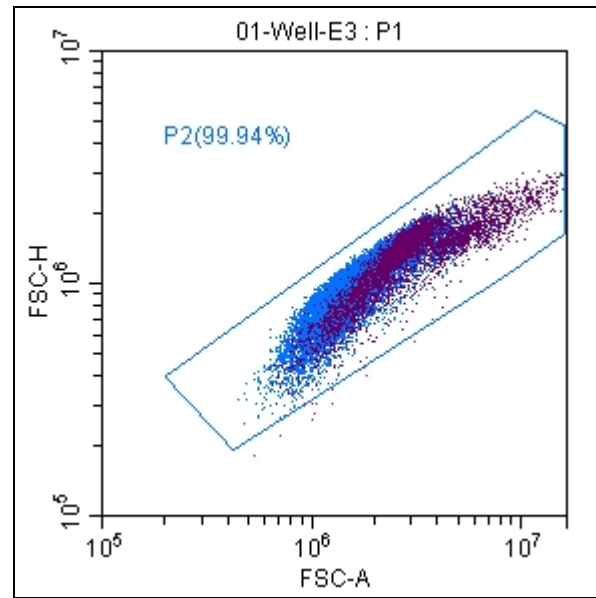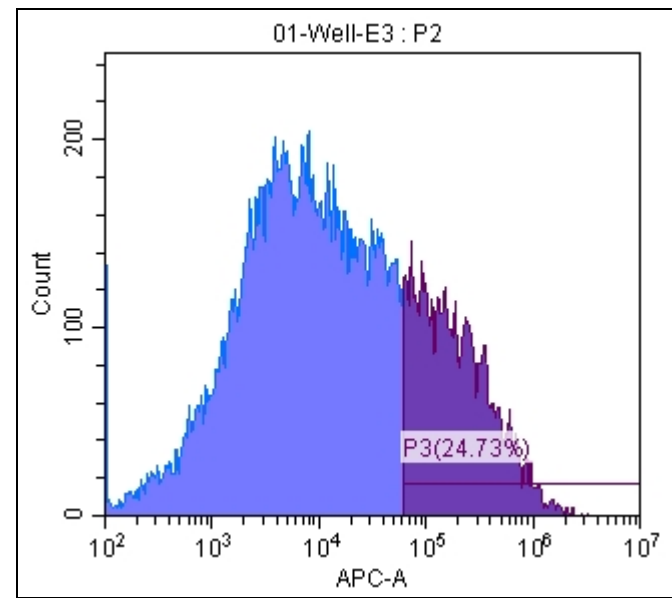

Tube Name: 01-Well-E3

Sample ID:

Record Time: 2022-08-31 13:05:41

| Population   | Events | % Total | % Parent | Median APC-A | Mean APC-A |
|--------------|--------|---------|----------|--------------|------------|
| ● All Events | 50000  | 100.00% | 100.00%  | 2354.2       | 34720.2    |
| ● P3         | 5244   | 10.49%  | 24.73%   | 169316.6     | 269644.0   |
| ● P2         | 21202  | 42.40%  | 99.94%   | 11348.7      | 75669.9    |
| ● P1         | 21214  | 42.43%  | 42.43%   | 11350.2      | 75654.0    |

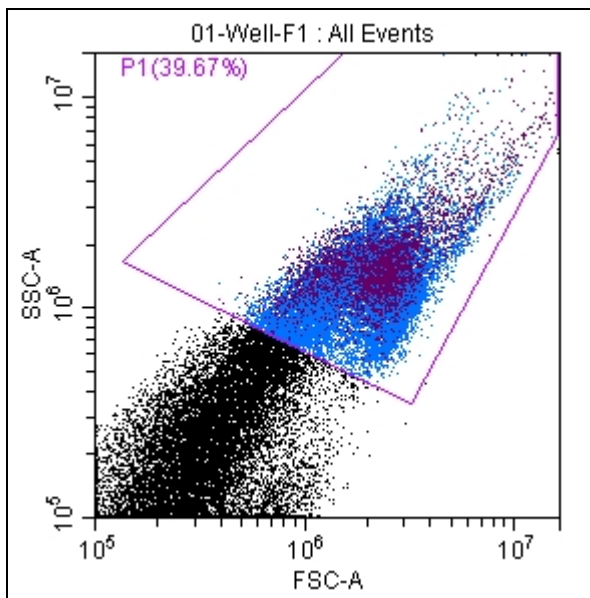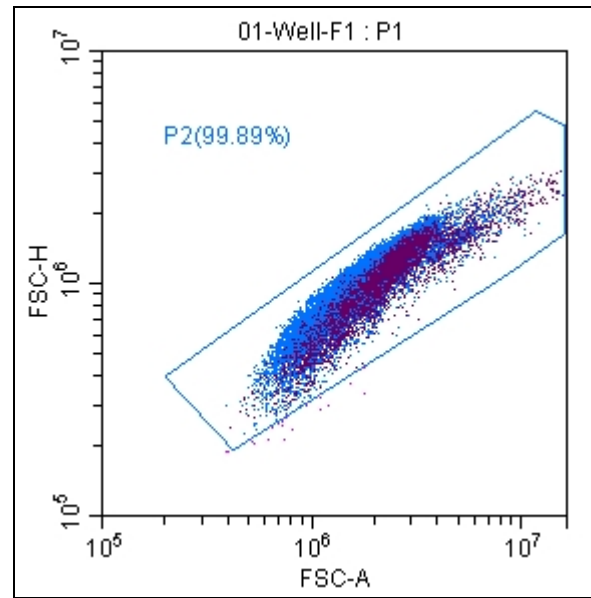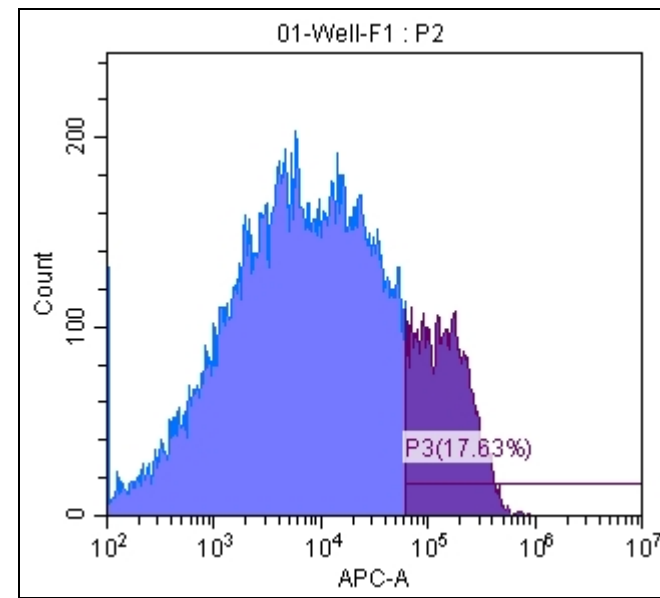

Tube Name: 01-Well-F1

Sample ID:

Record Time: 2022-08-31 12:58:33

| Population   | Events | % Total | % Parent | Median APC-A | Mean APC-A |
|--------------|--------|---------|----------|--------------|------------|
| ● All Events | 50000  | 100.00% | 100.00%  | 1214.1       | 16635.8    |
| ● P3         | 3494   | 6.99%   | 17.63%   | 137505.8     | 164106.7   |
| ● P2         | 19814  | 39.63%  | 99.89%   | 8578.1       | 38332.6    |
| ● P1         | 19836  | 39.67%  | 39.67%   | 8585.0       | 38355.9    |

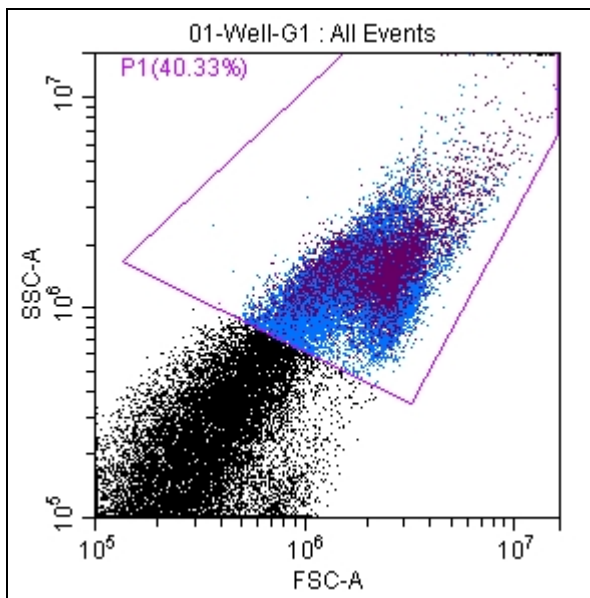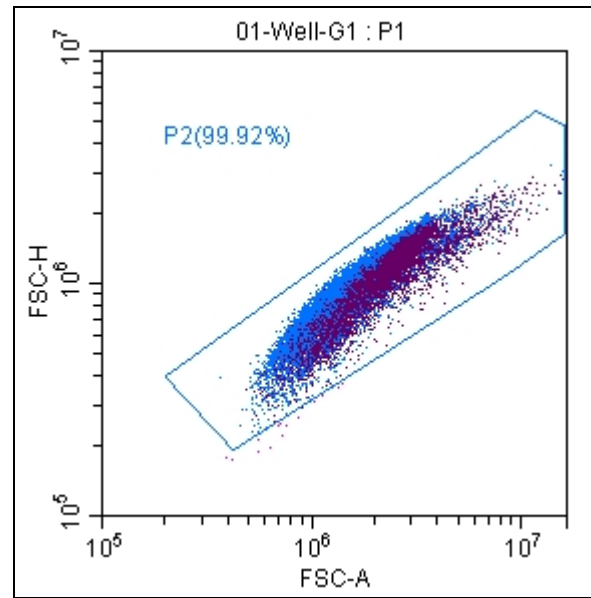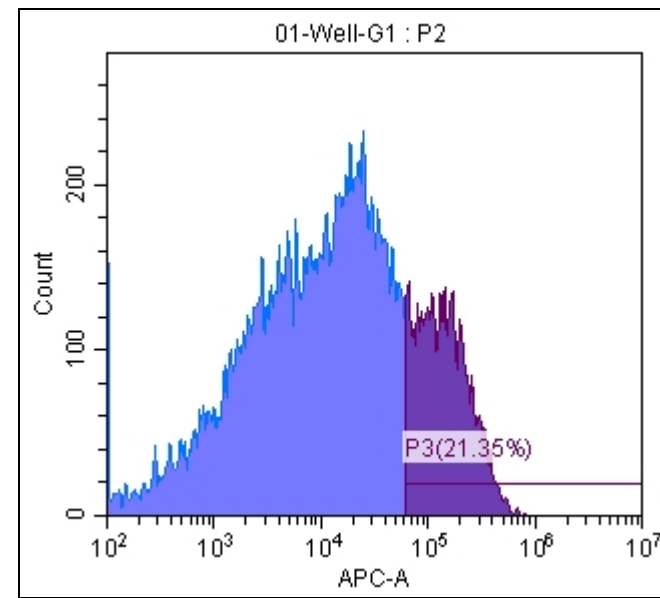

Tube Name: 01-Well-G1

Sample ID:

Record Time: 2022-08-31 12:59:12

| Population   | Events | % Total | % Parent | Median APC-A | Mean APC-A |
|--------------|--------|---------|----------|--------------|------------|
| ● All Events | 50000  | 100.00% | 100.00%  | 1690.9       | 20252.4    |
| ● P3         | 4301   | 8.60%   | 21.35%   | 134568.4     | 163567.3   |
| ● P2         | 20147  | 40.29%  | 99.92%   | 14030.1      | 45654.2    |
| ● P1         | 20163  | 40.33%  | 40.33%   | 14040.8      | 45642.4    |



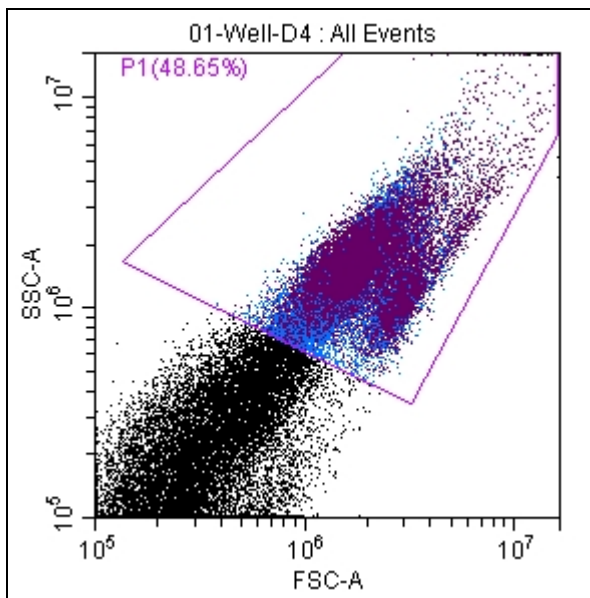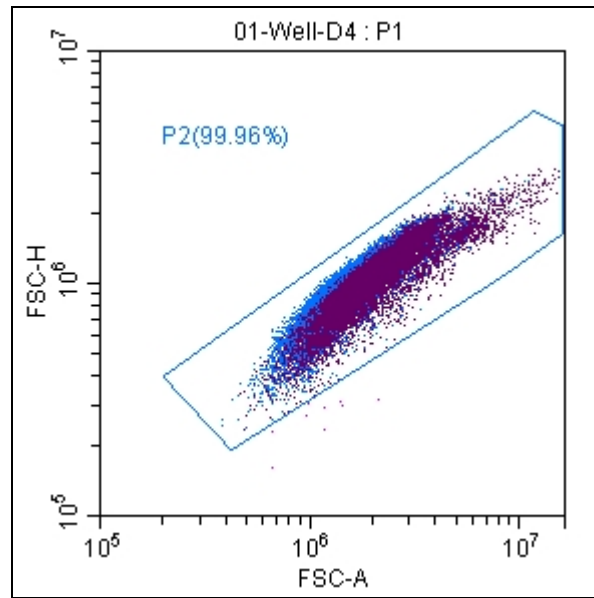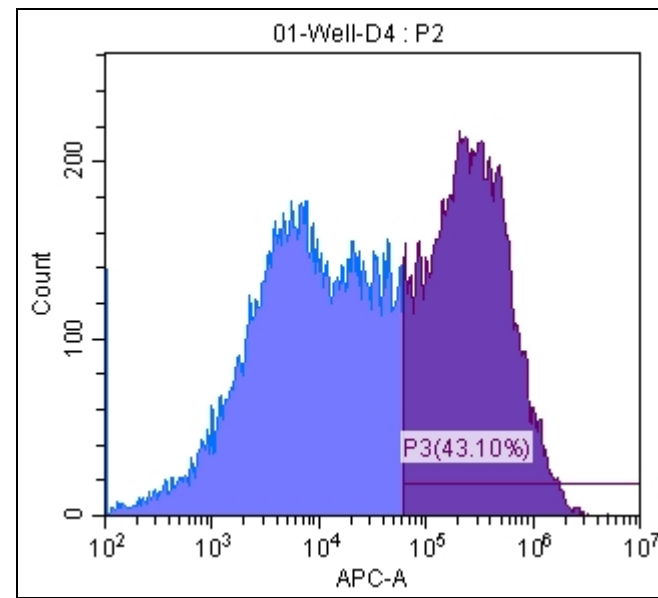

Tube Name: 01-Well-D4

Sample ID:

Record Time: 2022-08-31 13:08:53

| Population   | Events | % Total | % Parent | Median APC-A | Mean APC-A |
|--------------|--------|---------|----------|--------------|------------|
| ● All Events | 50000  | 100.00% | 100.00%  | 4774.0       | 82726.3    |
| ● P3         | 10479  | 20.96%  | 43.10%   | 250985.3     | 355609.8   |
| ● P2         | 24314  | 48.63%  | 99.96%   | 33811.4      | 160553.6   |
| ● P1         | 24324  | 48.65%  | 48.65%   | 33822.4      | 160544.8   |

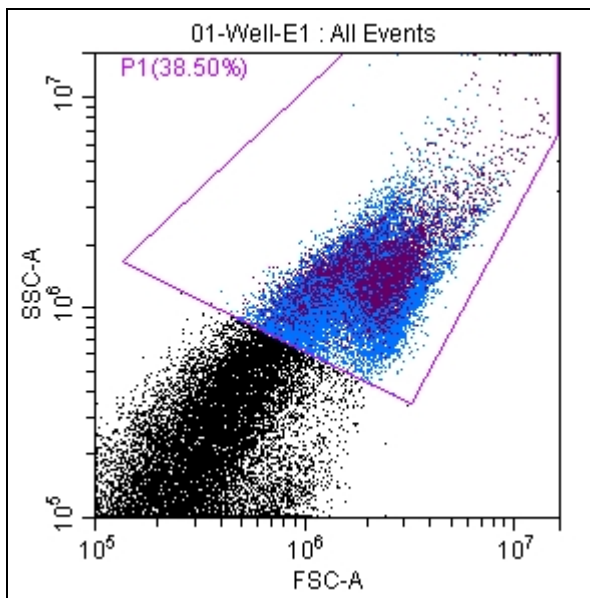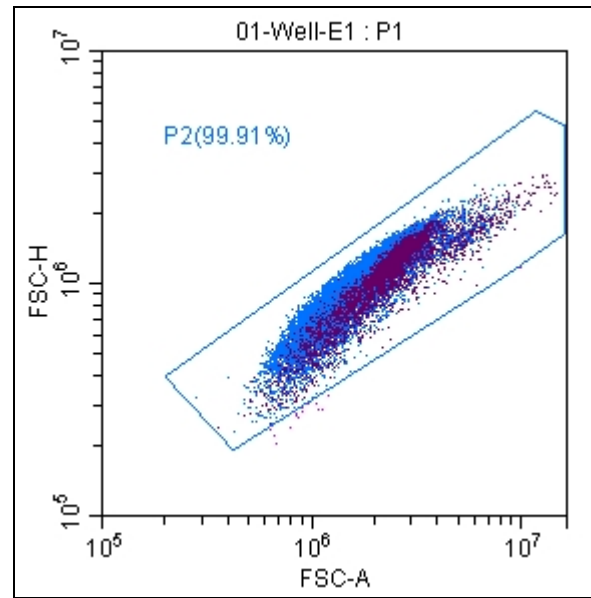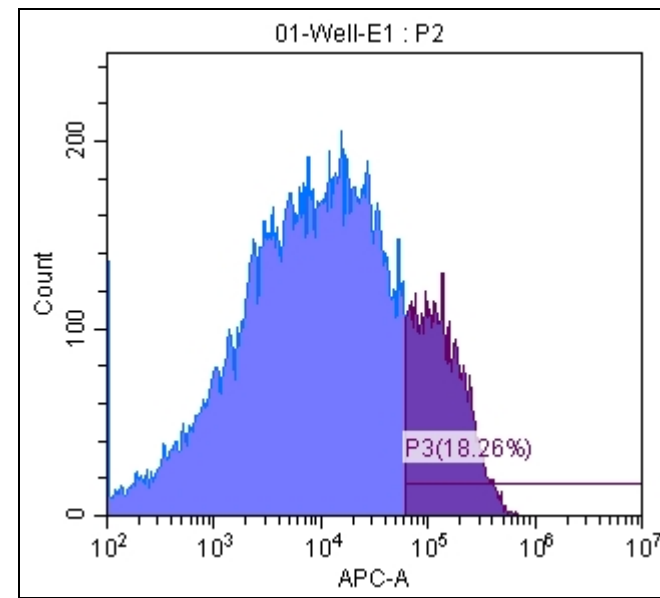

Tube Name: 01-Well-E1

Sample ID:

Record Time: 2022-08-31 12:57:53

| Population   | Events | % Total | % Parent | Median APC-A | Mean APC-A |
|--------------|--------|---------|----------|--------------|------------|
| ● All Events | 50000  | 100.00% | 100.00%  | 1366.8       | 16082.1    |
| ● P3         | 3512   | 7.02%   | 18.26%   | 124777.3     | 151007.0   |
| ● P2         | 19234  | 38.47%  | 99.91%   | 10722.9      | 37816.0    |
| ● P1         | 19252  | 38.50%  | 38.50%   | 10722.9      | 37823.8    |

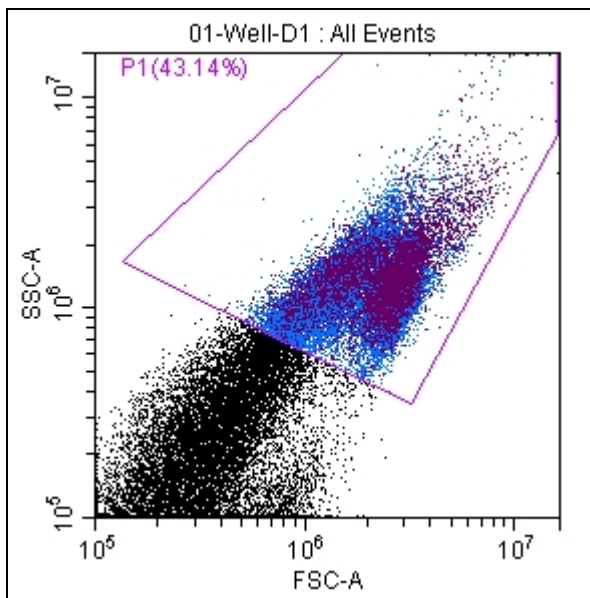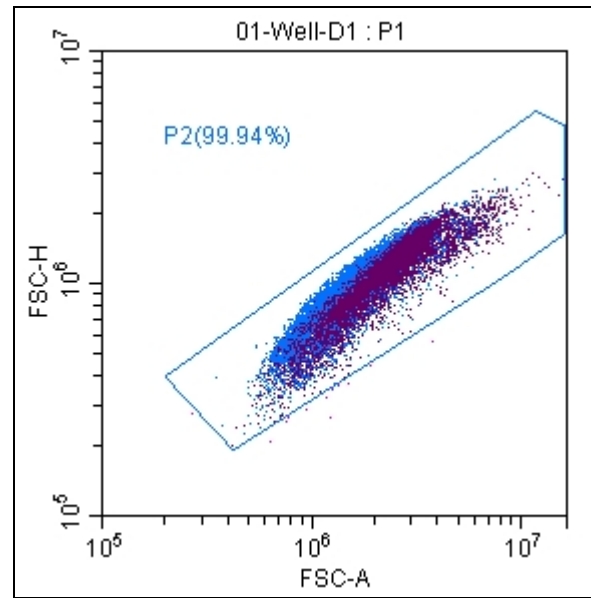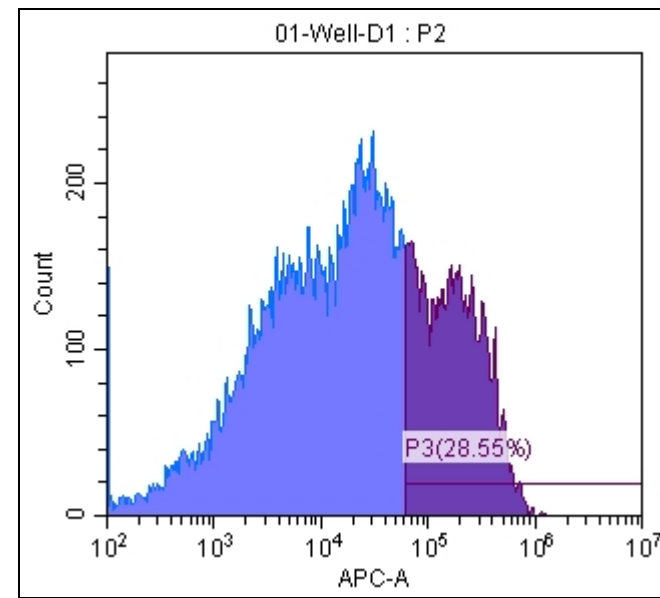

Tube Name: 01-Well-D1

Sample ID:

Record Time: 2022-08-31 12:57:14

| Population   | Events | % Total | % Parent | Median APC-A | Mean APC-A |
|--------------|--------|---------|----------|--------------|------------|
| ● All Events | 50000  | 100.00% | 100.00%  | 2837.4       | 32786.8    |
| ● P3         | 6156   | 12.31%  | 28.55%   | 162993.5     | 207813.4   |
| ● P2         | 21559  | 43.12%  | 99.94%   | 20408.3      | 70059.5    |
| ● P1         | 21572  | 43.14%  | 43.14%   | 20409.9      | 70058.0    |

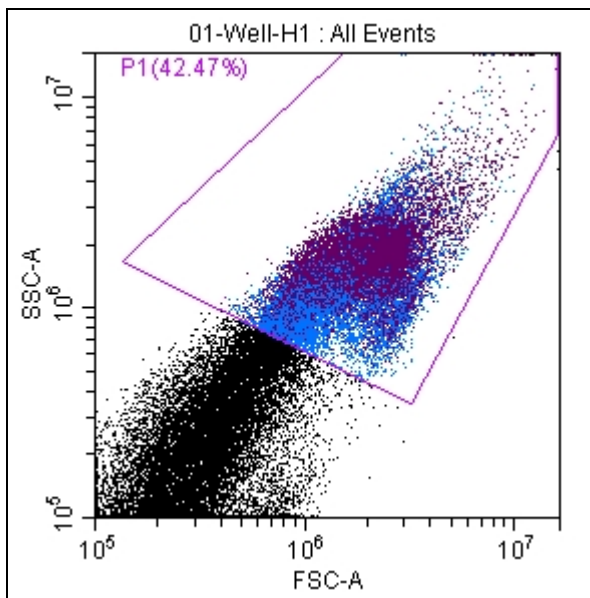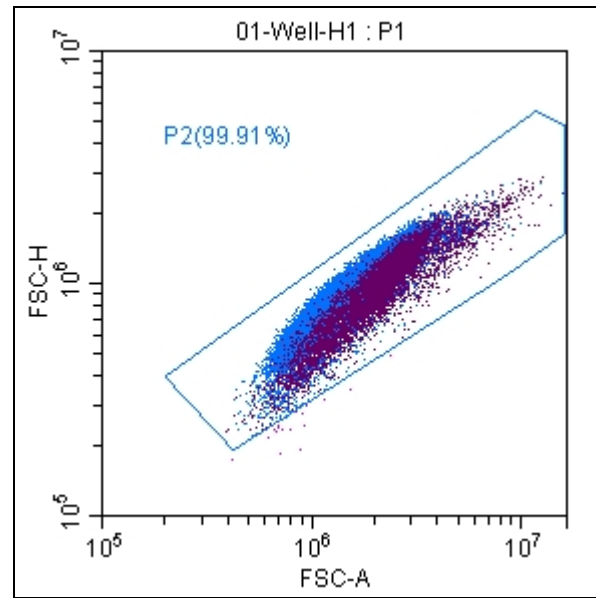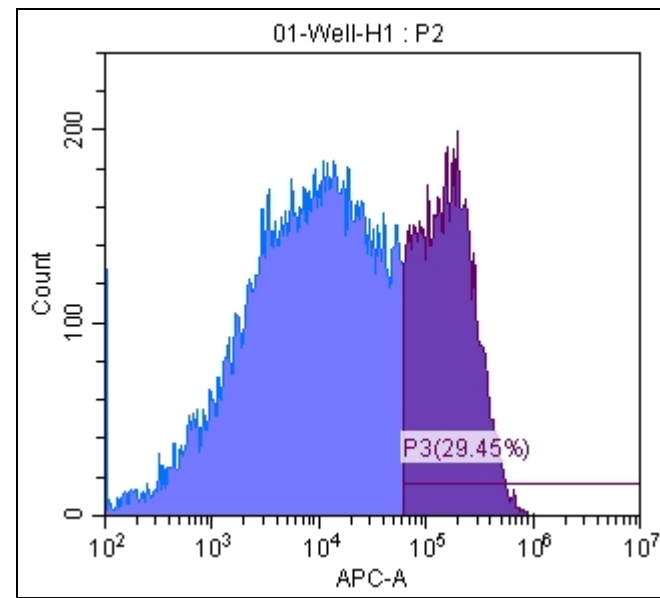

Tube Name: 01-Well-H1

Sample ID:

Record Time: 2022-08-31 12:59:52

| Population   | Events | % Total | % Parent | Median APC-A | Mean APC-A |
|--------------|--------|---------|----------|--------------|------------|
| ● All Events | 50000  | 100.00% | 100.00%  | 2093.1       | 28467.3    |
| ● P3         | 6247   | 12.49%  | 29.45%   | 152280.7     | 182314.4   |
| ● P2         | 21215  | 42.43%  | 99.91%   | 15909.2      | 62816.8    |
| ● P1         | 21234  | 42.47%  | 42.47%   | 15919.3      | 62813.0    |

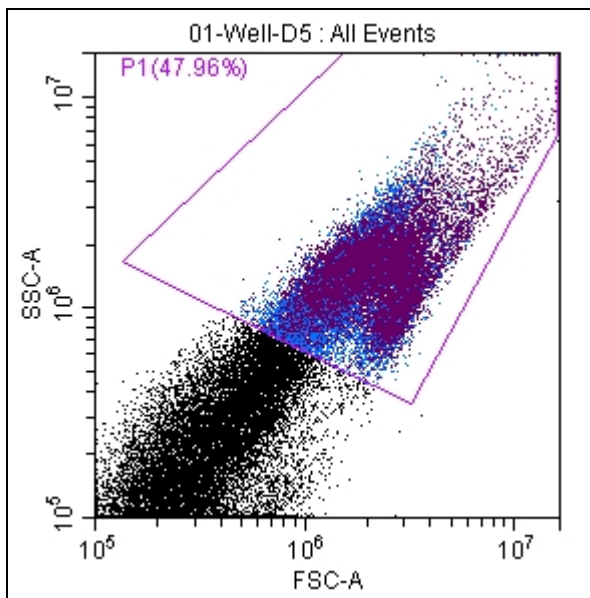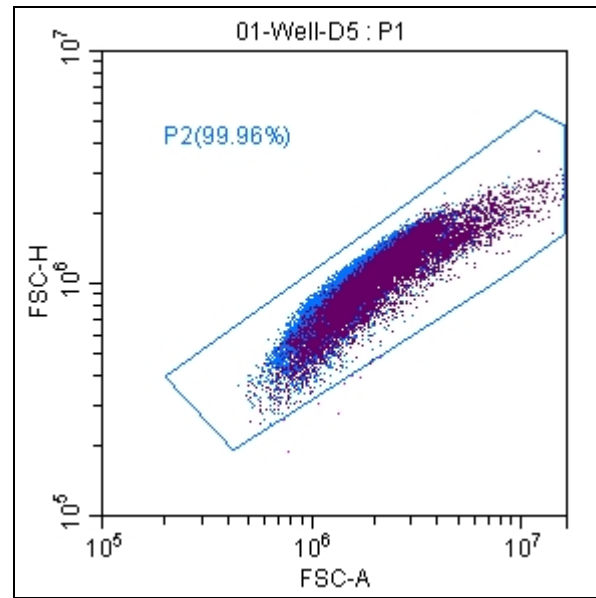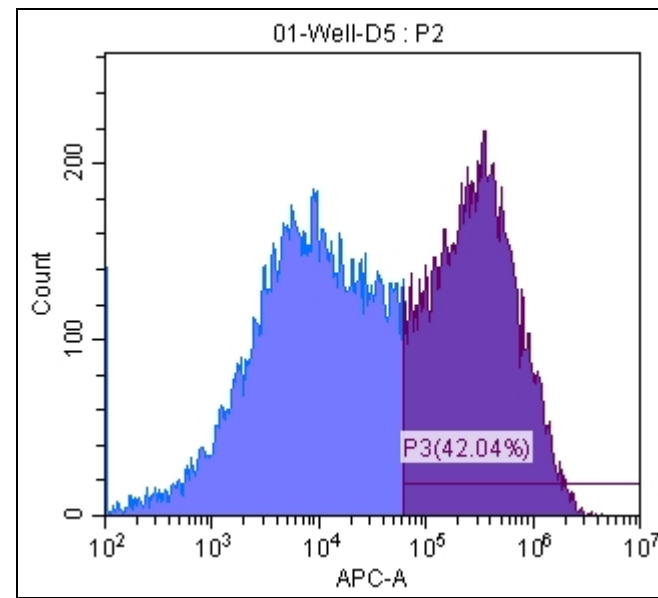

Tube Name: 01-Well-D5

Sample ID:

Record Time: 2022-08-31 13:12:47

| Population   | Events | % Total | % Parent | Median APC-A | Mean APC-A |
|--------------|--------|---------|----------|--------------|------------|
| ● All Events | 50000  | 100.00% | 100.00%  | 4997.5       | 90823.6    |
| ● P3         | 10076  | 20.15%  | 42.04%   | 286852.2     | 409235.4   |
| ● P2         | 23969  | 47.94%  | 99.96%   | 30455.9      | 179230.4   |
| ● P1         | 23979  | 47.96%  | 47.96%   | 30455.9      | 179207.5   |

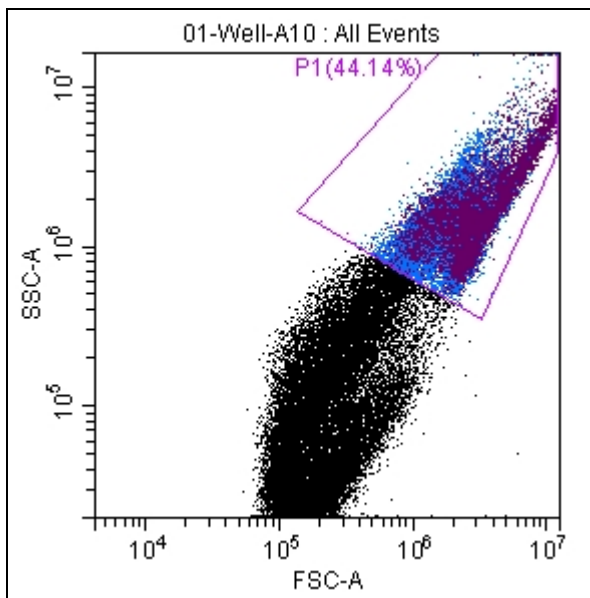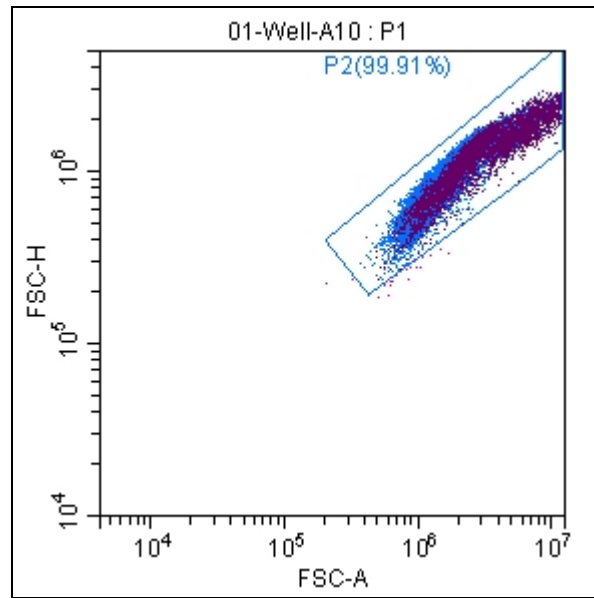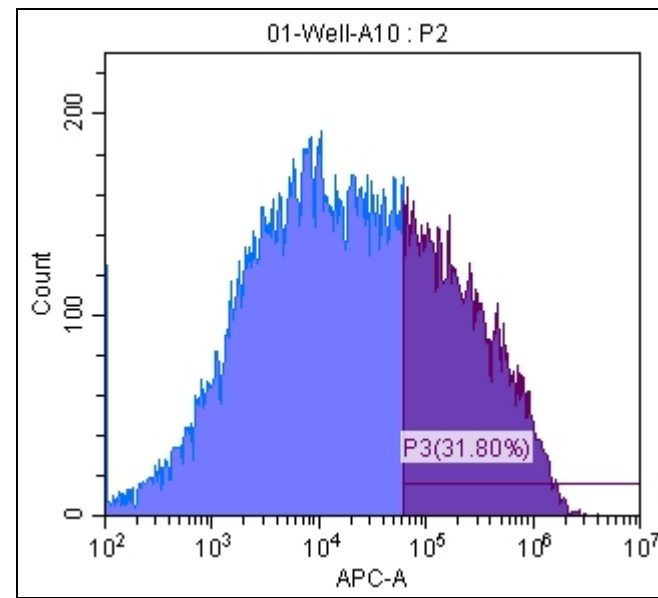

Tube Name: 01-Well-A10

Sample ID:

Record Time: 2023-02-11 12:47:38

| Population   | Events | % Total | % Parent | Mean APC-A | Median APC-A | rSD APC-A | SD APC-A |
|--------------|--------|---------|----------|------------|--------------|-----------|----------|
| ● All Events | 50000  | 100.00% | 100.00%  | 53538.6    | 2967.6       | 4621.8    | 175454.2 |
| ● P3         | 7013   | 14.03%  | 31.80%   | 328739.7   | 194899.1     | 162749.7  | 351320.3 |
| ● P2         | 22053  | 44.11%  | 99.91%   | 113739.3   | 18719.1      | 25923.0   | 246897.3 |
| ● P1         | 22072  | 44.14%  | 44.14%   | 113663.0   | 18715.8      | 25917.0   | 246806.8 |
